# Supplementary material for: One-minute and five-minute Apgar scores and child developmental health at 5 years of age: a population-based cohort study in British Columbia, Canada
Source: PubMed Central journal article supplement — BMJ Open. 2019 May 9;9(5):e027655. doi: 10.1136/bmjopen-2018-027655 (PMC6528022; doi:10.1136/bmjopen-2018-027655), 2019-05-09
Supplement: bmjopen-2018-027655.draft_revisions.pdf [file bmjopen-2018-027655.draft_revisions.pdf]

# BMJ Open

BMJ Open is committed to open peer review. As part of this commitment we make the peer review history of every article we publish publicly available.

When an article is published we post the peer reviewers' comments and the authors' responses online. We also post the versions of the paper that were used during peer review. These are the versions that the peer review comments apply to.

The versions of the paper that follow are the versions that were submitted during the peer review process. They are not the versions of record or the final published versions. They should not be cited or distributed as the published version of this manuscript.

BMJ Open is an open access journal and the full, final, typeset and author-corrected version of record of the manuscript is available on our site with no access controls, subscription charges or pay-per-view fees (<http://bmjopen.bmj.com>).

If you have any questions on BMJ Open's open peer review process please email [info.bmjopen@bmj.com](mailto:info.bmjopen@bmj.com)

# BMJ Open

## 1 and 5-minute Apgar scores and child developmental health at 5 years of age, a population-based cohort study

|                               |                                                                                                                                                                                                                                                                                                                                                                           |
|-------------------------------|---------------------------------------------------------------------------------------------------------------------------------------------------------------------------------------------------------------------------------------------------------------------------------------------------------------------------------------------------------------------------|
| Journal:                      | <i>BMJ Open</i>                                                                                                                                                                                                                                                                                                                                                           |
| Manuscript ID                 | bmjopen-2018-027655                                                                                                                                                                                                                                                                                                                                                       |
| Article Type:                 | Research                                                                                                                                                                                                                                                                                                                                                                  |
| Date Submitted by the Author: | 02-Nov-2018                                                                                                                                                                                                                                                                                                                                                               |
| Complete List of Authors:     | Razaz, Neda; Karolinska Institutet, Cnattingius, Sven; Karolinska Institute, Department of Medicine, Solna Persson, Martina; Karolinska Institute Tedroff, Kristina; Karolinska Institutet, Women's and Children's Health Lisonkova, Sarka; University British Columbia, Obstetrics and Gynaecology Joseph, K; University of British Columbia, Obstetrics and Gynaecology |
| Keywords:                     | NEONATOLOGY, EPIDEMIOLOGY, Fetal medicine < OBSTETRICS, PAEDIATRICS, Developmental neurology & neurodisability < PAEDIATRICS                                                                                                                                                                                                                                              |
|                               |                                                                                                                                                                                                                                                                                                                                                                           |

SCHOLARONE™  
Manuscripts

1  
2  
3 **1 and 5-minute Apgar scores and child developmental health at 5 years of age, a population-**  
4 **based cohort study**  
5  
6

7  
8 Neda Razaz, MPH, PhD;<sup>1</sup> Sven Cnattingius, MD, PhD;<sup>1</sup> Martina Persson, MD, PhD;<sup>1</sup> Kristina  
9 Tedroff, MD, PhD;<sup>2</sup> Sarka Lisonkova, MD, PhD;<sup>3</sup> K.S. Joseph, MD, PhD<sup>3</sup>  
10

11 **Affiliation:** <sup>1</sup> Department of Medicine, Solna, Clinical Epidemiology Unit, Karolinska Institutet,  
12 Stockholm, Sweden. <sup>2</sup> Department of Women's and Children's Health, Neuropediatric unit,  
13 Karolinska Institutet, Stockholm, Sweden. <sup>3</sup> Department of Obstetrics & Gynaecology, School of  
14 Population and Public Health, University of British Columbia and the Children's and Women's  
15 Hospital of British Columbia  
16

17  
18 **Address correspondence to:** Dr. Neda Razaz, Clinical Epidemiology Unit, Department of  
19 Medicine Solna, Karolinska University Hospital, Karolinska Institutet, SE-171 76 Stockholm,  
20 Sweden. [[neda.razaz@gmail.com](mailto:neda.razaz@gmail.com)] +46 851776181  
21

22  
23 **Funding statement:** No funding. NR is supported by a postdoctoral fellowship award from the  
24 Canadian Institutes of Health Research (CIHR). KSJ is supported by the BC Children's Hospital  
25 Research Institute and a Chair award from the CIHR (APR-126338).  
26

27 **Role of the funder:** None.  
28

29  
30 **Financial Disclosure:** The authors have no financial relationships relevant to this article to  
31 disclose.  
32

33 **Conflict of interest:** The authors have no potential conflicts of interest to disclose.  
34  
35

36 **Short title:** Apgar scores and child developmental health  
37  
38  
39  
40  
41  
42  
43  
44  
45  
46  
47  
48  
49  
50  
51  
52  
53  
54  
55  
56  
57  
58  
59  
60

## ABSTRACT

**Objectives:** We investigated the associations between Apgar scores at 1 and 5-minutes, across the entire range of score values, and child developmental health at 5 years of age.

**Setting:** British Columbia, Canada.

**Participants:** All singleton term infants without major congenital anomalies born between 1993 and 2009, who had a developmental assessment in kindergarten between 1999 and 2014.

**Main outcomes and measures:** Developmental vulnerability on 1 or more domains of the Early Development Instrument and special needs requirements. Adjusted rate ratios (aRRs) and 95% confidence intervals (CIs) were estimated using log-linear regression.

**Results:** Of the 150,081 children in the study, 45,334 (30.2%) were developmentally vulnerable and 3,644 (2.5%) had special needs. There was an increasing trend in developmental vulnerability and special needs with decreasing 1-minute and 5-minute Apgar scores. Compared with children with an Apgar score of 10 at 5-minute, the rate ratio for developmental vulnerability increased steadily with decreasing Apgar score from 1.02 (95%CI 1.00-1.04) for an Apgar score of 9 to 1.88 (95%CI 1.27-2.77) for an Apgar score of 1. Among children with 1 minute Apgar scores in the 7-10 range, changes in Apgar scores between 1 and 5-minutes were associated with significant differences in developmental vulnerability. Compared with children who had an Apgar score of 9 at 1-minute and 10 at 5-minutes, children with an Apgar score of 9 at both 1 and 5-minutes had higher rates of developmental vulnerability (aRR 1.03, 95%CI 1.01-1.05). Compared with infants with an Apgar of 10 at both 1 and 5-minutes, infants with a 1-minute score of 10 and a 5-minute score of <10 had higher rates of developmental vulnerability (aRR 1.53, 95%CI 1.08-2.17).

**Conclusion:** Risks of adverse developmental health and having special needs at 5 years of age are inversely associated with 1 minute and 5-minute Apgar scores across their entire range.

1  
2  
3 **Article Summary:**  
4

5 **Strengths and limitations of this study:**  
6

- 7
- 8 • Ability to access comprehensive health and education-related databases at the population  
9 level.  
10
  - 11 • Using a teacher reported instrument, no reliance was placed on parent or self-report of  
12 developmental health.  
13
  - 14 • There may be some individual differences in teachers' ability to evaluate developmental  
15 health on the EDI.  
16
  - 17 • Study was restricted to the comparatively healthy subset of all term live births, as children  
18 with disabilities may not have enrolled in kindergarten.  
19  
20  
21  
22  
23  
24  
25  
26  
27  
28  
29  
30  
31  
32  
33  
34  
35  
36  
37  
38  
39  
40  
41  
42  
43  
44  
45  
46  
47  
48  
49  
50  
51  
52  
53  
54  
55  
56  
57  
58  
59  
60

## INTRODUCTION

In 1953, Virginia Apgar proposed a scoring system that enabled a rapid assessment of the clinical status of the newborn infant and identified infants requiring resuscitation on the basis of heart rate, respiration, color, muscle tone and reflex irritability.<sup>1</sup> Initially, the Apgar score at 1 minute was used to assess the need for immediate resuscitation. Subsequently, the Apgar score at 5-minute was shown to be a better predictor of neonatal survival than the Apgar score at 1 minute. Although the value of a low Apgar score for predicting adverse neonatal outcomes has been questioned,<sup>2</sup> low Apgar scores are well correlated with both short-term<sup>3</sup> and long-term outcomes, in both preterm and term infants.<sup>4-10</sup>

Only the lowest and more compromised Apgar scores have been conventionally regarded as predictive of maladaptive development and morbidity. Nevertheless, a few population-based studies have shown that risks of cerebral palsy, epilepsy, early developmental health status and need for special education are inversely associated with 5 minute-Apgar scores in a dose-dependent manner across the entire range of scores.<sup>11-13</sup> Even children with an Apgar score of 9 at 5 or 10 minutes have an increased risk of adverse neurological outcomes compared with children with 5 or 10 minutes Apgar scores of 10.<sup>11,12</sup> Approximately 65% to 85% of newborns receive a 1 minute or a 5-minute Apgar score in the 7 to 9 range,<sup>12</sup> yet, there is a dearth of information on how this impacts a child's developmental health.

Changes in Apgar score values between 1 and 5 minutes, and between 5 and 10 minutes are known to influence risks of cerebral palsy and epilepsy.<sup>11,14,15</sup> Our recent population-based study demonstrated elevated risks of cerebral palsy and epilepsy among children with a 5-minute Apgar

1  
2  
3 score of 7 or 8, even if their 10-minute Apgar score was 9 or 10.<sup>11</sup> Although it is recognized that  
4  
5 changes in Apgar scores between 1 and 5 minutes are a useful measure of the response to  
6  
7 resuscitation, the long-term significance of changes in such Apgar scores within the “normal”  
8  
9 range (i.e., 7-10) is not clear.  
10  
11

12  
13  
14 In this population-based study, we investigated the associations between Apgar scores at 1 and 5  
15  
16 minutes across the entire range of score values, and developmental health at 5 years of age. We  
17  
18 also analyzed the effect of a change in Apgar scores from 1 to 5 minutes, including changes within  
19  
20 the normal range of Apgar scores. Specifically, we were interested in developmental health among  
21  
22 children with 1 minute Apgar score in the 7-9 range who received a score less than 10 at 5 minutes.  
23  
24  
25  
26  
27

## 28 **METHODS**

29  
30 Information on the study population was obtained from several population-based linked health and  
31  
32 demographic databases in British Columbia. The anonymized linked data used in this study  
33  
34 included information from the Discharge Abstract Database<sup>16</sup> that comprised hospital admission  
35  
36 and discharge records; the Vital Statistics Birth and Clinical Births<sup>17</sup> databases, which contained  
37  
38 information on all births in the province, along with delivery and neonatal health status, including  
39  
40 diagnoses based on International Classification of Diseases (ICD 9 or ICD-10CA) codes; Census  
41  
42 GeoData, which provided socioeconomic status (SES) data expressed as average neighbourhood  
43  
44 income quintiles (based on Census information from Statistics Canada and quantified using postal  
45  
46 codes);<sup>18</sup> the Consolidation File,<sup>19</sup> which provided demographic information on study subjects and  
47  
48 confirmed residency in the province; and the Early Development Instrument (EDI)<sup>20</sup> data, which  
49  
50 provided information on early childhood developmental health, and were accessed through linkage  
51  
52  
53  
54  
55  
56  
57  
58  
59  
60

1  
2  
3 with the Human Early Learning Partnership.<sup>21</sup> Teachers completed the EDI for each child in their  
4 kindergarten class (age range 5-7 years) in February. The EDI is designed to tap five core areas of  
5 early childhood development:<sup>20,22</sup> physical health and well-being; social competence; emotional  
6 maturity; language and cognitive development; and communication skills and general knowledge  
7 (Supplementary Table 1).<sup>20</sup> It consists of 104 binary and Likert-scale items, from which scores  
8 between 0 and 10 are calculated for each domain. The EDI also records demographic information  
9 on each child and whether the child has identified special needs.  
10  
11  
12  
13  
14  
15  
16  
17  
18  
19  
20

21 The study population included all singleton term ( $\geq 37$  weeks' gestation) infants born between April  
22 1, 1993 and December 31, 2009, who had documented 1 minute and 5-minute Apgar scores as well  
23 as a completed EDI assessment in kindergarten. Inclusion of infants with these birth dates meant  
24 that children were 5 to 7 years of age between 1999 and 2014 and part of the EDI assessment. The  
25 study population was restricted to infants without major congenital anomalies, identified using  
26 diagnosis codes from linked hospital records in the year after birth.  
27  
28  
29  
30  
31  
32  
33  
34  
35  
36  
37

38 Apgar scores at 1 and 5 minutes were considered as the main exposures and examined both as  
39 discrete values from 0 to 10 and also as grouped categories (Apgar values of 0-3, 4-6, 7, 8, 9, and  
40 10). Children with an Apgar score of 0 at 1 or 5 minutes who did not have a diagnostic code for  
41 birth asphyxia [ICD-9: 768.5, 768.6 and 768.9; ICD-10: P21], or an intervention code for either  
42 resuscitation or ventilation (Canadian Classification of health interventions: 1.GZ.30, 1.GZ31,  
43 1.HZ.30, 1361, 1362, 1363, 1373, 1379, 1004) were excluded from the study (n=470), as  
44 information on these cases likely resulted from transcription errors.  
45  
46  
47  
48  
49  
50  
51  
52  
53  
54  
55  
56  
57  
58  
59  
60



1  
2  
3 Developmental health included whether a child had special needs or was developmentally  
4 vulnerable as measured by the EDI. Children were categorized as being developmentally  
5 vulnerable if their scores on the EDI fell below the 10<sup>th</sup> percentile value<sup>23</sup> in any of the five  
6 domains, based on the national EDI cut-off scores.<sup>24</sup> The 10<sup>th</sup> percentile cut-off has been  
7 recommended because it is usually higher than clinical cut-off points of 3% or 5% for clinically  
8 diagnosing behaviour<sup>20</sup> and should therefore include children who may be more difficult to  
9 diagnose.<sup>25</sup> Children with special needs were defined as requiring special assistance because of  
10 chronic medically, physically, or intellectually disabling conditions.  
11  
12  
13  
14  
15  
16  
17  
18  
19  
20  
21  
22  
23

24 Other independent variables included infant sex (male vs female), birth weight-for-gestational age,  
25 age of the child in years at the time of EDI assessment, gestational age at birth in completed weeks  
26 (37, 38, 39, 40, 41, and  $\geq 42$ ), birth order (1, 2, 3, and +4), marital status (married vs not married)  
27 and socioeconomic status (SES). Birth weight-for-gestational age was categorized as: small (<10<sup>th</sup>  
28 percentile), appropriate (10<sup>th</sup>-90<sup>th</sup> percentile) and large (>90<sup>th</sup> percentile) for gestational age.<sup>26</sup> Each  
29 child's family income was derived from the median household income in the child's residential  
30 area (based on postal code) obtained from the 2006 Canadian Census data.<sup>27-29</sup>  
31  
32  
33  
34  
35  
36  
37  
38  
39  
40  
41  
42  
43  
44  
45  
46  
47  
48  
49  
50  
51  
52  
53  
54  
55  
56  
57  
58  
59  
60

The frequency of each 5-minute Apgar score value was calculated within categories of maternal  
and infant characteristics. Multivariable log-linear regression models with robust variance  
estimates<sup>30</sup> was used to examine the association between Apgar score at 1 and 5 minutes and  
developmental vulnerability and special needs. Results were expressed as rate ratios (RRs) with  
95% confidence intervals (CIs). Other variables included in the final models were based on the  
literature<sup>23,31</sup> or statistical significance (P value <0.1). The full model included child's sex, child's

1  
2  
3 age at EDI completion, socioeconomic status, child's first language, birth weight-for-gestational  
4  
5 age, birth order, and gestational age. Interactions between Apgar scores and other determinants  
6  
7 were examined and stratified analyses were carried out when a significant interaction was present.  
8  
9  
10 The University of British Columbia's Clinical Research Ethics Board approved the study.  
11  
12  
13

### 14 **Patient and public involvement**

15  
16  
17 No patients were involved in setting the research question or the outcome measures, nor were they  
18  
19 involved in developing plans for or implementation of the study. No patients were asked to advise  
20  
21 on interpretation or writing up of results. There are no plans to disseminate the results of the  
22  
23 research to study participants or the relevant patient community.  
24  
25  
26  
27

### 28 **RESULTS**

29  
30  
31 There were 150,081 children (mean age = 5.7 years) with a gestational age at birth of  $\geq 37$  weeks,  
32  
33 without major malformations and complete Apgar and EDI data included in the study. Five-minute  
34  
35 Apgar scores showed a U-shaped association with gestational age at birth, with low scores more  
36  
37 frequent at 37 weeks and  $\geq 42$  weeks (Table 1). Low 5-minute Apgar scores were comparable for  
38  
39 most characteristics but more frequent among males, small-for-gestational age live births, children  
40  
41 of mothers who were nulliparous, not married and those with a low SES.  
42  
43  
44  
45

46  
47 Overall, the prevalence of vulnerability in one or more domains of the EDI was 30.2%, with  
48  
49 physical and social domains having the highest rates of vulnerability at 15.2% and 12.7%,  
50  
51 respectively (Figure 1). There was an increasing trend in the rate of developmental vulnerability  
52  
53 with decreasing 1 minute and 5-minute Apgar scores (P for trend  $< 0.001$ ; Table 2). However, this  
54  
55  
56  
57  
58  
59

1  
2  
3 association was much more pronounced for the 5-minute Apgar score. Compared with children  
4 with an Apgar score of 10 at 5-minute, children with a 5-minute Apgar score of 2 had 1.57 times  
5 higher rates of developmental vulnerability (95% CI 1.03-2.39). Similarly, children with a 5-  
6 minute Apgar score of 7, 8 or 9 had significantly higher rates of developmental vulnerability  
7 compared with children with a 5-minute Apgar score of 10 (adjusted rate ratios 1.08, 1.06 and 1.02  
8 for Apgar 7, 8 and 9, respectively; Table 2). The association between 5-minute Apgar scores and  
9 developmental vulnerability was mainly due to the higher rates of vulnerability in the language and  
10 emotional domains of the EDI (Supplementary Table 2).  
11  
12  
13  
14  
15  
16  
17  
18  
19  
20  
21  
22  
23

24 In total, 3,644 (2.5%) children had special needs (Table 3). The proportion of children with special  
25 needs increased linearly with decreasing 1 minute and 5-minute Apgar scores (P for trend <0.001).  
26 Compared with children who had a 1 minute Apgar score of 10, those with an Apgar score of 2 at 1  
27 minute had significantly higher adjusted rates of having special needs (adjusted rate ratio 1.72,  
28 95% CI 1.19-2.48), while those with an Apgar score of 5 at 1 minute had 1.39 times higher rates of  
29 having special needs (95% CI 1.05-1.85). Children with score of 7 to 9 at 1 minute were not more  
30 likely to have special needs. However, children with 5-minute Apgar scores in the 1 to 8 range had  
31 elevated adjusted rate ratios for having special needs which consistently increased with decreasing  
32 5-minute Apgar score values: from 1.20 in children with an Apgar score of 8 at 5 minutes to 5.13  
33 among those with an Apgar score of 1 at 5 minutes.  
34  
35  
36  
37  
38  
39  
40  
41  
42  
43  
44  
45  
46  
47  
48

49 Table 4 shows rates of developmental vulnerability in relation to changes in Apgar score from 1 to  
50 5 minutes, among children whose 1 minute Apgar score was in the normal range (7 to 10). Among  
51 children with a 1 minute Apgar score of 7, the rate of developmental vulnerability decreased in a  
52  
53  
54  
55  
56  
57  
58  
59  
60

1  
2  
3 dose-response manner with greater improvement in the Apgar score from 1 to 5 minutes (P value  
4 for dose response = 0.02). Larger reductions in developmental vulnerability with greater  
5  
6 improvements in 1 to 5-minute Apgar scores were also evident among children with a 1 minute  
7  
8 Apgar score of 9 (P value for trend 0.009) but not among children with a 1 minute Apgar score of 8  
9  
10 (P for trend 0.36). Children with an Apgar score of 9 at 1 minute and 9 at 5-minute had higher rates  
11  
12 of developmental vulnerability compared with those who had an Apgar score of 9 at 1 minute and  
13  
14 10 at 5-minute (adjusted rate ratio 1.03, 95% CI 1.01-1.05). Furthermore, compared with children  
15  
16 who had Apgar scores of 10 at both 1 and 5 minutes, children whose 1 minute Apgar score  
17  
18 decreased from 10 to a 5-minute Apgar score of <10, had 1.53 times higher rates of developmental  
19  
20 vulnerability (adjusted rate ratio 1.53, 95% CI 1.08-2.17).  
21  
22  
23  
24  
25  
26  
27

## 28 **DISCUSSION**

29  
30  
31 In this population-based study, we found graded, continuously increasing risks of developmental  
32  
33 vulnerability and special needs at 5 years of age with decreasing 1 and 5-minute Apgar scores. In  
34  
35 particular, children with “normal” 5-minute Apgar scores of 7, 8 and 9 were more likely to have  
36  
37 developmental vulnerability compared with children with 5-minute Apgar scores of 10. Similarly,  
38  
39 children who had Apgar scores of 7 or 8 at 5-minute had higher risks of having special needs  
40  
41 compared with those with a 5-minute Apgar score of 10. Furthermore, children with a 1 minute  
42  
43 Apgar score in the normal range (7 or 9) had an increased risk of developmental vulnerability, if  
44  
45 their Apgar score at 5-minute was <10. Finally, a reduction in the Apgar score from 10 at 1 minute  
46  
47 to 7-9 at 5-minute, substantially increased the risk of developmental vulnerability.  
48  
49  
50  
51  
52  
53

54 Our results confirm previous findings from a smaller cohort, which showed that developmental  
55  
56  
57  
58  
59  
60

1  
2  
3 adversity extended in a linear fashion across the full range of Apgar scores.<sup>12</sup> Both research and  
4  
5 clinical practice generally emphasize the increased risks of adverse outcomes associated with very  
6  
7 low and less common Apgar scores (i.e., <7 or <4). Our results suggest that the negative  
8  
9 association between Apgar score and developmental adversity or special needs extends across the  
10  
11 full range of scores. Consistent with our findings, previous studies have shown a significant linear  
12  
13 relationship between each one-point decrease in 5- and 10-minute Apgar scores and increasing risk  
14  
15 of epilepsy, cerebral palsy, and needing education in a special school.<sup>11,13</sup> While profound perinatal  
16  
17 events can cause death or obvious neurological deficits, milder insults may sometimes cause subtle  
18  
19 cognitive impairment only detectable as the child grows older.  
20  
21  
22  
23  
24  
25

26 Our study also showed that changes in Apgar scores from 1 to 5 minutes were associated with  
27  
28 developmental vulnerability. This is in agreement with previous studies showing that changes in  
29  
30 Apgar scores immediately after birth influence risks of cerebral palsy and epilepsy.<sup>11,14,15</sup> To our  
31  
32 knowledge, this is the first study that examined risks of developmental adversity in relation to  
33  
34 changes in Apgar scores from 1 to 5 minutes. Current guidelines define “normal” Apgar scores as 7  
35  
36 or more at 1 minute and 8 or more at 5-minute, indicating that the baby does not require assistance  
37  
38 if scores are within these ranges.<sup>32</sup> However, our results reveal that small changes within the  
39  
40 normal range (7-9) or even a slight reduction in score from 10 at 1 minute to 9 at 5-minute can  
41  
42 significantly increase the risk of developmental vulnerability. Similarly, infants who have low  
43  
44 Apgar scores for prolonged, or even brief periods are reported to have a higher risk of poor IQ  
45  
46 scores at age 18, even if the infants recover subsequently.<sup>5</sup> These findings provide justification for  
47  
48 monitoring all infants with 1 minute Apgar scores of 10 (to identify those whose scores may be  
49  
50  
51  
52  
53  
54  
55  
56  
57  
58  
59  
60

1  
2  
3 declining) and providing appropriate support to infants with normal Apgar scores between 7 and 9  
4  
5 at 1 minute (to ensure that they achieve a more optimal 5-minute score).  
6  
7  
8  
9

10 The strengths of our study included the ability to access comprehensive health and education-  
11 related databases at the population level. By using a teacher reported instrument, no reliance was  
12 placed on parent or self-report of developmental health. Nonetheless, there may be some individual  
13 differences in teachers' ability to evaluate developmental health on the EDI.<sup>24</sup> Further, our study  
14 was restricted to the comparatively healthy subset of all term live births, as children with  
15 disabilities may not have enrolled in kindergarten or may have enrolled in special needs schools.  
16 We acknowledge that the Apgar score as recorded in medical charts represents routine clinical  
17 practice,<sup>33</sup> and it is prone to interobserver variability,<sup>33</sup> specifically in intubated newborn babies.<sup>34</sup>  
18 However, the quality of Apgar score values should not differ between children with and without  
19 later diagnosed developmental vulnerability.  
20  
21  
22  
23  
24  
25  
26  
27  
28  
29  
30  
31  
32  
33  
34

35 In summary, our study showed that the risk of developmental vulnerability and special needs at 5  
36 years of age was inversely associated with 1 and 5 minutes Apgar scores across their entire range.  
37 Furthermore, improvements in Apgar scores between 1 and 5 minutes among children with a 1  
38 minute Apgar score of 7 or 9 resulted in lower risk of developmental vulnerability. These results  
39 provide clinicians with valuable prognostic information and justification to monitor and to provide  
40 appropriate support to infants who are even mildly compromised at 1 and 5 minutes.  
41  
42  
43  
44  
45  
46  
47  
48  
49  
50  
51  
52  
53  
54  
55  
56  
57  
58  
59  
60

## Acknowledgment

**Funding support:** No funding. NR is supported by a postdoctoral fellowship award from the Canadian Institutes of Health Research (CIHR). KSJ is supported by the BC Children's Hospital Research Institute and a Chair award from the CIHR (APR-126338)

**Role of the funder:** None.

### Contributor's statement:

Neda Razaz conceptualized and designed the study, analyzed the data, drafted the initial manuscript, and finalized the manuscript based on coauthor feedback. She had full access to all the data in the study and takes responsibility for the integrity of the data and the accuracy of the data analysis.

Sven Cnattingius, Martina Persson, Kristina Tedroff, and Sarka Lisonkova, reviewed and commented on the initial and final analyses, provided feedback on the initial draft of the manuscript and approved the final version of the manuscript.

KS Joseph assisted with conceptualization and design of the study, and reviewed and commented on the initial and final analyses, provided feedback on the initial draft of the manuscript and approved the final version of the manuscript.

**Financial disclosure:** None

**Conflict of interest:** None

**A data sharing statement:** No additional data available

**Disclosure:** All inferences, opinions, and conclusions drawn in this journal article are those of the authors, and do not reflect the opinions or policies of the Data Steward(s).

1  
2  
3 **What is already known on this topic:** Risks of cerebral palsy, epilepsy, early developmental  
4 health status and need for special education are inversely associated with 5 minute-Apgar scores in  
5 a dose-dependent manner across the entire range of scores. Even children with an Apgar score of 9  
6 at 5 or 10 minutes have an increased risk of adverse neurological outcomes compared with children  
7 with 5 or 10 minutes Apgar scores of 10.  
8  
9  
10  
11  
12  
13  
14  
15  
16

17 **What this study adds:** Risk of adverse developmental health and having special needs at 5 years  
18 of age were inversely associated with 1 and 5 minutes Apgar scores across its entire range.  
19 Changes in Apgar scores between 1 and 5 minutes among children with 1-minute Apgar scores in  
20 the normal range (7 to 10) were associated with significant differences in rates of adverse  
21 developmental health. These findings provide justification for monitoring infants with 1 minute  
22 Apgar of 10 and providing appropriate support to infants with normal Apgar scores between 7 and  
23 9 at 1 minute.  
24  
25  
26  
27  
28  
29  
30  
31  
32  
33  
34  
35  
36  
37  
38  
39  
40  
41  
42  
43  
44  
45  
46  
47  
48  
49  
50  
51  
52  
53  
54  
55  
56  
57  
58  
59  
60



**REFERENCE:**

1. Apgar V. A proposal for a new method of evaluation of the newborn. *Current Research Anaesth* 1953;32:260-267.
2. Bharti B, Bharti S. A review of the Apgar score indicated that contextualization was required within the contemporary perinatal and neonatal care framework in different settings. *J Clin Epidemiol* 2005;58:121-129.
3. Li J, Cnattingus S, Gissler M, Vestergaard M, Obel C, Ahrensberg J, Olsen J. The 5-minute Apgar score as a predictor of childhood cancer: a population-based cohort study in five million children. *BMJ open* 2012;2.
4. Moore EA, Harris F, Laurens KR, Green MJ, Brinkman S, Lenroot RK, Carr VJ. Birth outcomes and academic achievement in childhood: A population record linkage study. *Journal of Early Childhood Research* 2014:1476718X13515425.
5. Odd DE, Rasmussen F, Gunnell D, Lewis G, Whitelaw A. A cohort study of low Apgar scores and cognitive outcomes. *Archives of Disease in Childhood-Fetal and Neonatal Edition* 2008;93:F115-F120.
6. Ehrenstein V, Pedersen L, Grijota M, Nielsen GL, Rothman KJ, Sørensen HT. Association of Apgar score at five minutes with long-term neurologic disability and cognitive function in a prevalence study of Danish conscripts. *BMC Pregnancy Childbirth* 2009;9:14.
7. Moster D, Lie R, Markestad T. Joint association of Apgar scores and early neonatal symptoms with minor disabilities at school age. *Archives of Disease in Childhood-Fetal and Neonatal Edition* 2002;86:F16-F21.
8. Marschik PB, Einspieler C, Garzarolli B, Prechtl HF. Events at early development: Are they associated with early word production and neurodevelopmental abilities at the preschool age? *Early Hum Dev* 2007;83:107-114.
9. Krebs L, Langhoff-Roos J, Thorngren-Jerneck K. Long-term outcome in term breech infants with low Apgar score—a population-based follow-up. *European Journal of Obstetrics & Gynecology and Reproductive Biology* 2001;100:5-8.
10. Cnattingus S, Norman M, Granath F, Petersson G, Stephansson O, Frisell T. Apgar Score Components at 5 Minutes: Risks and Prediction of Neonatal Mortality. *Paediatr Perinat Epidemiol* 2017;31:328-337.
11. Persson M, Razaz N, Tedroff K, Joseph KS, Cnattingus S. Five and 10 minute Apgar scores and risks of cerebral palsy and epilepsy: population based cohort study in Sweden. *BMJ* 2018;360.
12. Razaz N, Boyce WT, Brownell M, Jutte D, Tremlett H, Marrie RA, Joseph KS. Five-minute Apgar score as a marker for developmental vulnerability at 5 years of age. *Archives of Disease in Childhood - Fetal and Neonatal Edition* 2016;101:F114-F120.
13. Stuart A, Olausson PO, Källen K. Apgar scores at 5 minutes after birth in relation to school performance at 16 years of age. *Obstet Gynecol* 2011;118:201-208.
14. Sun Y, Vestergaard M, Pedersen CB, Christensen J, Olsen J. Apgar scores and long-term risk of epilepsy. *Epidemiology (Cambridge, Mass)* 2006;17:296-301.
15. Moster D, Lie RT, Irgens LM, Bjerkedal T, Markestad T. The association of Apgar score with subsequent death and cerebral palsy: A population-based study in term infants. *The Journal of pediatrics* 2001;138:ned798-803.

16. British Columbia Ministry of Health [creator] [2012]: Discharge Abstract Database (Hospital Separations). Population Data BC [publisher];Data Extract. MOH (2012).
17. British Columbia Vital Statistics Agency [creator] (2012): Vital Statistics Births. Population Data BC [publisher];Data Extract BC Vital Statistics Agency (2012).
18. Statistics Canada [creator] (2009): Statistics Canada Income Band Data. Catalogue Number: 13C0016. Population Data BC [publisher]; Population Data BC (2017).
19. British Columbia Ministry of Health [creator] [2012]: Consolidation File (MSP Registration & Premium Billing). Population Data BC [publisher];Data Extract. MOH (2012).
20. Janus M, Offord DR. Development and psychometric properties of the early development instrument (EDI): A measure of children's school readiness. *Can J Behav Sci* 2007;39:1-22.
21. Human Early Learning Partnership [creator] (2012): Early Development Instrument. Population Data BC [publisher];Data Extract. Human Early Learning Partnership. Vancouver, BC: University of British Columbia, School of Population and Public Health (2012).
22. Duncan GJ, Dowsett CJ, Claessens A, Magnuson K, Huston AC, Klebanov P, Pagani LS, Feinstein L, Engel M, Brooks-Gunn J. School readiness and later achievement. *Dev Psychol* 2007;43:1428.
23. Janus M, Duku E. The School Entry Gap: Socioeconomic, Family, and Health Factors Associated with Children's School Readiness to Learn. *Early Education* 2007;18:375-403.
24. Measuring in support of early childhood development: The Normative II report [online] 2012; The Offord Centre for Child Studies Available at: [http://www.offordcentre.com/readiness/files/updated\\_normative\\_II.pdf](http://www.offordcentre.com/readiness/files/updated_normative_II.pdf). Accessed April 1, 2013.
25. Brinkman S, Sayers M, Goldfeld S, Kline J. Population monitoring of language and cognitive development in Australia: The Australian Early Development Index. *Int J Speech Lang Pathol* 2009;11:419-430.
26. Kramer MS, Platt RW, Wen SW, Joseph K, Allen A, Abrahamowicz M, Blondel B, Bréart G. A new and improved population-based Canadian reference for birth weight for gestational age. *Pediatrics* 2001;108:e35-e35.
27. Martens P. Health Inequities in Manitoba: Is the Socioeconomic Gap in Health Widening Or Narrowing Over Time? Winnipeg: Manitoba Centre for Health Policy, University of Manitoba, 2010.
28. Mustard C, Derksen S, Berthelot J, Wolfson M. Assessing ecological proxies for household income: a comparison of household income and neighborhood level income measures in the study of population health status. *Health and Place* 1999;5:157-171.
29. Krieger N. Overcoming the absence of socioeconomic data in medical records: Validation and application of a census-based methodology. *Am J Public Health* 1992;82:703-710.
30. Zou G. A Modified Poisson Regression Approach to Prospective Studies with Binary Data. *Am J Epidemiol* 2004;159:702-706.
31. Santos R, Brownell MD, Ekuma O, Mayer T, Soodeen RA. The Early Development Instrument (EDI) in Manitoba: Linking Socioeconomic Adversity and Biological Vulnerability at Birth to Children's Outcomes at Age 5. Winnipeg, MB: Manitoba Centre for Health Policy, University of Manitoba, 2012.
32. Pediatrics AAo. The APGAR score. *Adv Neonatal Care* 2006;6:220-223.
33. O'Donnell CP, Kamlin COF, Davis PG, Carlin JB, Morley CJ. Interobserver variability of the 5-minute Apgar score. *The Journal of pediatrics* 2006;149:486-489.
34. Lopriore E, van Burk GF, Walther FJ, de Beaufort AJ. Correct use of the Apgar score for resuscitated and intubated newborn babies: questionnaire study. *BMJ* 2004;329:143-144.

1  
2  
3  
4  
5  
6  
7  
8  
9  
10  
11  
12  
13  
14  
15  
16  
17  
18  
19  
20  
21  
22  
23  
24  
25  
26  
27  
28  
29  
30  
31  
32  
33  
34  
35  
36  
37  
38  
39  
40  
41  
42  
43  
44  
45  
46  
47  
48  
49  
50  
51  
52

For peer review only

53 **Table 1. Maternal and birth characteristics according to Apgar score at five minutes among singleton term live births,**  
54 **British Columbia, 1993-2009**  
55

---

56  
57  
58  
59  
60

| Maternal and birth characteristics | Total          | Apgar 0-3  | Apgar 4-6   | Apgar 7     | Apgar 8     | Apgar 9        | Apgar 10      |
|------------------------------------|----------------|------------|-------------|-------------|-------------|----------------|---------------|
|                                    | No. (%)        | No. (%)    | No. (%)     | No. (%)     | No. (%)     | No. (%)        | No. (%)       |
| Total                              | 150081 (100)   | 147 (0.10) | 1328 (0.88) | 2375 (1.58) | 7666 (5.11) | 101191 (67.42) | 37374 (24.90) |
| Maternal age (years)               |                |            |             |             |             |                |               |
| ≤19                                | 6170 (4.11)    | 9 (0.15)   | 87 (1.41)   | 119 (1.93)  | 358 (5.80)  | 3959 (64.17)   | 1638 (26.55)  |
| 20-24                              | 24637 (16.42)  | 23 (0.09)  | 273 (1.11)  | 435 (1.77)  | 1449 (5.88) | 15973 (64.83)  | 6484 (26.32)  |
| 25-29                              | 43832 (29.21)  | 44 (0.10)  | 384 (0.88)  | 719 (1.64)  | 2275 (5.19) | 29217 (66.66)  | 11193 (25.54) |
| 30-34                              | 47332 (31.54)  | 47 (0.10)  | 380 (0.80)  | 710 (1.50)  | 2254 (4.76) | 32398 (68.45)  | 11543 (24.39) |
| ≥35                                | 28081 (18.71)  | 24 (0.09)  | 203 (0.72)  | 391 (1.39)  | 1329 (4.73) | 19627 (69.89)  | 6507 (23.17)  |
| Missing                            | 29 (0.02)      | 0 (0)      | <5 (<17.24) | <5 (<17.24) | <5 (<17.24) | 17 (58.62)     | 9 (31.03)     |
| Socioeconomic status               |                |            |             |             |             |                |               |
| 5th quintile [highest]             | 27519 (18.34)  | 27 (0.10)  | 249 (0.90)  | 452 (1.64)  | 1377 (5.00) | 18406 (66.88)  | 7008 (25.47)  |
| 4th quintile                       | 31282 (20.84)  | 33 (0.11)  | 259 (0.83)  | 528 (1.69)  | 1682 (5.38) | 20894 (66.79)  | 7886 (25.21)  |
| 3rd quintile                       | 30939 (20.61)  | 32 (0.10)  | 266 (0.86)  | 510 (1.65)  | 1602 (5.18) | 20875 (67.47)  | 7654 (24.74)  |
| 2nd quintile                       | 31266 (20.83)  | 19 (0.06)  | 263 (0.84)  | 464 (1.48)  | 1589 (5.08) | 21177 (67.73)  | 7754 (24.80)  |
| 1st quintile [lowest]              | 28889 (19.25)  | 36 (0.12)  | 289 (1.00)  | 419 (1.45)  | 1410 (4.88) | 19716 (68.25)  | 7019 (24.30)  |
| Missing                            | 186 (0.12)     | 0 (0)      | <5 (<2.69)  | <5 (<2.69)  | 6 (3.23)    | 123 (66.13)    | 53 (28.49)    |
| Married                            |                |            |             |             |             |                |               |
| Yes                                | 103099 (68.70) | 88 (0.09)  | 807 (0.78)  | 1518 (1.47) | 4880 (4.73) | 70552 (68.43)  | 25254 (24.49) |
| No                                 | 43374 (28.90)  | 53 (0.12)  | 489 (1.13)  | 804 (1.85)  | 2608 (6.01) | 28163 (64.93)  | 11257 (25.95) |
| Missing                            | 3608 (2.40)    | 6 (0.17)   | 32 (0.89)   | 53 (1.47)   | 178 (4.93)  | 2476 (68.63)   | 863 (23.92)   |
| Infant's sex                       |                |            |             |             |             |                |               |
| Female                             | 73809 (49.18)  | 56 (0.08)  | 573 (0.78)  | 1075 (1.46) | 3626 (4.91) | 49576 (67.17)  | 18903 (25.61) |
| Male                               | 76272 (50.82)  | 91 (0.12)  | 755 (0.99)  | 1300 (1.70) | 4040 (5.30) | 51615 (67.67)  | 18471 (24.22) |
| Birth order                        |                |            |             |             |             |                |               |
| 1                                  | 67516 (44.99)  | 83 (0.12)  | 845 (1.25)  | 1408 (2.09) | 4136 (6.13) | 45859 (67.92)  | 15185 (22.49) |
| 2                                  | 56025 (37.33)  | 49 (0.09)  | 353 (0.63)  | 693 (1.24)  | 2419 (4.32) | 37822 (67.51)  | 14689 (26.22) |
| 3                                  | 19239 (12.82)  | 13 (0.07)  | 89 (0.46)   | 202 (1.05)  | 794 (4.13)  | 12825 (66.66)  | 5316 (27.63)  |
| ≥4                                 | 7301 (4.86)    | <5 (<0.07) | 41 (0.56)   | 72 (0.99)   | 317 (4.34)  | 4685 (64.17)   | 2184 (29.91)  |
| Gestational age                    |                |            |             |             |             |                |               |
| 37 weeks                           | 8966 (5.97)    | 9 (0.10)   | 97 (1.08)   | 181 (2.02)  | 617 (6.88)  | 6099 (68.02)   | 1963 (21.89)  |
| 38 weeks                           | 25821 (17.20)  | 13 (0.05)  | 192 (0.74)  | 353 (1.37)  | 1205 (4.67) | 17612 (68.21)  | 6446 (24.96)  |
| 39 weeks                           | 37408 (34.03)  | 34 (0.09)  | 286 (0.76)  | 494 (1.32)  | 1630 (4.36) | 25652 (68.57)  | 9312 (24.89)  |
| 40 weeks                           | 51079 (34.03)  | 50 (0.10)  | 419 (0.82)  | 842 (1.65)  | 2577 (5.05) | 33871 (66.31)  | 13320 (26.08) |

|    |                                            |                |             |             |             |             |               |               |
|----|--------------------------------------------|----------------|-------------|-------------|-------------|-------------|---------------|---------------|
| 1  |                                            |                |             |             |             |             |               |               |
| 2  |                                            |                |             |             |             |             |               |               |
| 3  |                                            |                |             |             |             |             |               |               |
| 4  | 41 weeks                                   | 25040 (16.68)  | 38 (0.15)   | 306 (1.22)  | 468 (1.87)  | 1522 (6.08) | 16873 (67.38) | 5833 (23.29)  |
| 5  | 42-44 weeks                                | 1767 (1.18)    | <5 (<0.28)  | 28 (1.58)   | 37 (2.09)   | 115 (6.51)  | 1084 (61.35)  | 500 (28.3)    |
| 6  |                                            |                |             |             |             |             |               |               |
| 7  | Birth weight-for-gestational age           |                |             |             |             |             |               |               |
| 8  | Appropriate                                | 121035 (80.65) | 110 (0.09)  | 1022 (0.84) | 1832 (1.51) | 5998(4.96)  | 81599 (67.42) | 30474 (25.18) |
| 9  | Small                                      | 11581 (7.72)   | 22 (0.19)   | 156 (1.35)  | 255 (2.20)  | 713 (6.16)  | 7764 (67.04)  | 2671 (23.06)  |
| 10 | Large                                      | 17445 (11.62)  | 14 (0.08)   | 149 (0.85)  | 288 (1.65)  | 955 (5.47)  | 11820 (67.76) | 4219 (24.18)  |
| 11 | Missing                                    | 20 (0.01)      | <5 (<25.00) | <5 (<25.00) | 0 (0)       | 0 (0)       | 8 (40.00)     | 10 (50.00)    |
| 12 |                                            |                |             |             |             |             |               |               |
| 13 |                                            |                |             |             |             |             |               |               |
| 14 | Child's age at EDI data collection (years) |                |             |             |             |             |               |               |
| 15 | Means (SD)                                 | 5.70 (0.32)    | 5.67 (0.30) | 5.65 (0.30) | 5.66 (0.30) | 5.66 (0.30) | 5.65 (0.30)   | 5.65 (0.30)   |
| 16 |                                            |                |             |             |             |             |               |               |
| 17 |                                            |                |             |             |             |             |               |               |
| 18 |                                            |                |             |             |             |             |               |               |
| 19 |                                            |                |             |             |             |             |               |               |
| 20 |                                            |                |             |             |             |             |               |               |
| 21 |                                            |                |             |             |             |             |               |               |
| 22 |                                            |                |             |             |             |             |               |               |
| 23 |                                            |                |             |             |             |             |               |               |
| 24 |                                            |                |             |             |             |             |               |               |
| 25 |                                            |                |             |             |             |             |               |               |
| 26 |                                            |                |             |             |             |             |               |               |
| 27 |                                            |                |             |             |             |             |               |               |
| 28 |                                            |                |             |             |             |             |               |               |
| 29 |                                            |                |             |             |             |             |               |               |
| 30 |                                            |                |             |             |             |             |               |               |
| 31 |                                            |                |             |             |             |             |               |               |
| 32 |                                            |                |             |             |             |             |               |               |
| 33 |                                            |                |             |             |             |             |               |               |
| 34 |                                            |                |             |             |             |             |               |               |
| 35 |                                            |                |             |             |             |             |               |               |
| 36 |                                            |                |             |             |             |             |               |               |
| 37 |                                            |                |             |             |             |             |               |               |
| 38 |                                            |                |             |             |             |             |               |               |
| 39 |                                            |                |             |             |             |             |               |               |
| 40 |                                            |                |             |             |             |             |               |               |
| 41 |                                            |                |             |             |             |             |               |               |
| 42 |                                            |                |             |             |             |             |               |               |
| 43 |                                            |                |             |             |             |             |               |               |
| 44 |                                            |                |             |             |             |             |               |               |
| 45 |                                            |                |             |             |             |             |               |               |
| 46 |                                            |                |             |             |             |             |               |               |
| 47 |                                            |                |             |             |             |             |               |               |
| 48 |                                            |                |             |             |             |             |               |               |
| 49 |                                            |                |             |             |             |             |               |               |
| 50 |                                            |                |             |             |             |             |               |               |
| 51 |                                            |                |             |             |             |             |               |               |
| 52 |                                            |                |             |             |             |             |               |               |
| 53 |                                            |                |             |             |             |             |               |               |
| 54 |                                            |                |             |             |             |             |               |               |
| 55 |                                            |                |             |             |             |             |               |               |
| 56 |                                            |                |             |             |             |             |               |               |
| 57 |                                            |                |             |             |             |             |               |               |
| 58 |                                            |                |             |             |             |             |               |               |
| 59 |                                            |                |             |             |             |             |               |               |
| 60 |                                            |                |             |             |             |             |               |               |

**Table 2. Apgar scores at one and five minutes and rate ratios for developmental vulnerability among singleton term live births, British Columbia, Canada**

| Apgar Score           | Total No. of children | No. with outcome | %           | Developmental vulnerability |                  |
|-----------------------|-----------------------|------------------|-------------|-----------------------------|------------------|
|                       |                       |                  |             | Crude                       | Adjusted*        |
|                       |                       |                  |             | Rate Ratio (95% CI)         |                  |
| <b>1-Min Apgar</b>    | <b>150081</b>         | <b>45334</b>     | <b>30.2</b> |                             |                  |
| 0                     | 24                    | 9                | 37.5        | 1.25 (0.74–2.10)            | 1.08 (0.64–1.83) |
| 1                     | 469                   | 161              | 34.3        | 1.15 (1.00–1.31)            | 1.16 (1.02–1.32) |
| 2                     | 1060                  | 329              | 31.0        | 1.04 (0.93–1.15)            | 1.03 (0.93–1.14) |
| 3                     | 1760                  | 546              | 31.0        | 1.04 (0.95–1.13)            | 1.03 (0.95–1.13) |
| 4                     | 2582                  | 814              | 31.5        | 1.05 (0.97–1.14)            | 1.07 (0.99–1.15) |
| 5                     | 4069                  | 1261             | 31.0        | 1.03 (0.96–1.11)            | 1.05 (0.98–1.12) |
| 6                     | 6975                  | 2124             | 30.5        | 1.02 (0.95–1.08)            | 1.04 (0.98–1.11) |
| 7                     | 12019                 | 3648             | 30.4        | 1.01 (0.95–1.08)            | 1.03 (0.97–1.09) |
| 8                     | 38671                 | 11666            | 30.2        | 1.01 (0.95–1.06)            | 1.02 (0.96–1.08) |
| 9                     | 79369                 | 23852            | 30.1        | 1.00 (0.95–1.06)            | 1.00 (0.95–1.06) |
| 10                    | 3083                  | 924              | 30.0        | 1.00 (Reference)            | 1.00 (Reference) |
| P for trend           |                       |                  |             |                             | <0.001           |
| Per one unit of Apgar |                       |                  |             |                             | 0.99 (0.98-0.99) |
| <b>5-Min Apgar</b>    |                       |                  |             |                             |                  |
| 0                     | 20                    | 7                | 35.0        | 1.18 (0.65–2.15)            | 1.16 (0.62–2.17) |
| 1                     | 16                    | 9                | 56.3        | 1.90 (1.24–2.93)            | 1.88 (1.27–2.77) |
| 2                     | 28                    | 13               | 46.4        | 1.57 (1.05–2.34)            | 1.57 (1.03–2.39) |
| 3                     | 83                    | 30               | 36.2        | 1.22 (0.92–1.63)            | 1.25 (0.93–1.67) |
| 4                     | 106                   | 43               | 40.6        | 1.37 (1.09–1.73)            | 1.33 (1.06–1.67) |
| 5                     | 290                   | 85               | 29.3        | 0.99 (0.83–1.19)            | 0.98 (0.82–1.17) |
| 6                     | 932                   | 306              | 32.8        | 1.11 (1.01–1.22)            | 1.08 (0.99–1.18) |
| 7                     | 2375                  | 740              | 31.2        | 1.05 (0.99–1.12)            | 1.08 (1.01–1.14) |
| 8                     | 7666                  | 2387             | 31.1        | 1.05 (1.02–1.09)            | 1.06 (1.02–1.10) |
| 9                     | 101191                | 30668            | 30.3        | 1.03 (1.01–1.04)            | 1.02 (1.00–1.04) |
| 10                    | 37374                 | 11046            | 29.6        | 1.00 (Reference)            | 1.00 (Reference) |
| P for trend           |                       |                  |             |                             | <0.001           |
| Per one unit of Apgar |                       |                  |             |                             | 0.98 (0.97-0.99) |

\*Adjusted for child's sex (male vs female), child's age at EDI completion (years), socioeconomic status (1st quintile, 2nd quintile, 3rd quintile, 4th quintile vs 5th quintile) child's first language (other vs English), birth order (2, 3, +4 vs 1), birth weight-for-gestational age (large, small vs appropriate), gestational age (weeks).

**Table 3. Apgar score at one and five minutes and rate ratios for special needs status among singleton term live births in British Columbia, Canada**

| Apgar Score           | Total No. of children | No. with outcome | %          | Special Needs       |                  |
|-----------------------|-----------------------|------------------|------------|---------------------|------------------|
|                       |                       |                  |            | Rate Ratio (95% CI) |                  |
|                       |                       |                  |            | Crude               | Adjusted*        |
| <b>1-Min Apgar</b>    | <b>148699</b>         | <b>3644</b>      | <b>2.5</b> |                     |                  |
| 0                     | 22                    | <5               | 4.6        | 1.94 (0.28–13.4)    | 1.44 (0.23–8.97) |
| 1                     | 463                   | 26               | 5.6        | 2.40 (1.55–3.72)    | 2.23 (1.44–3.46) |
| 2                     | 1054                  | 45               | 4.3        | 1.82 (1.26–2.63)    | 1.72 (1.19–2.48) |
| 3                     | 1743                  | 53               | 3.0        | 1.30 (0.91–1.84)    | 1.23 (0.86–1.74) |
| 4                     | 2554                  | 69               | 2.7        | 1.15 (0.83–1.60)    | 1.09 (0.79–1.52) |
| 5                     | 4032                  | 136              | 3.4        | 1.44 (1.09–1.91)    | 1.39 (1.05–1.85) |
| 6                     | 6894                  | 191              | 2.8        | 1.18 (0.90–1.55)    | 1.16 (0.89–1.52) |
| 7                     | 11903                 | 298              | 2.5        | 1.07 (0.83–1.38)    | 1.06 (0.82–1.37) |
| 8                     | 38300                 | 946              | 2.5        | 1.06 (0.83–1.34)    | 1.07 (0.84–1.35) |
| 9                     | 78701                 | 1808             | 2.3        | 0.98 (0.78–1.24)    | 1.00 (0.79–1.26) |
| 10                    | 3033                  | 71               | 2.3        | 1.00 (Reference)    | 1.00 (Reference) |
| P for trend           |                       |                  |            |                     | <0.001           |
| Per one unit of Apgar |                       |                  |            |                     | 0.99 (0.98-0.99) |
| <b>5-Min Apgar</b>    |                       |                  |            |                     |                  |
| 0                     | 17                    | <5               | <29.4      | 2.51 (0.37–16.8)    | 2.59 (0.41–16.3) |
| 1                     | 15                    | <5               | <33.3      | 5.69 (1.56–20.7)    | 5.13 (1.45–18.1) |
| 2                     | 28                    | <5               | <17.9      | 6.10 (2.46–15.2)    | 5.17 (2.01–13.3) |
| 3                     | 83                    | 9                | 10.8       | 4.63 (2.49–8.61)    | 3.78 (2.03–7.02) |
| 4                     | 103                   | 7                | 6.8        | 2.90 (1.41–5.95)    | 2.59 (1.25–5.35) |
| 5                     | 289                   | 8                | 2.8        | 1.18 (0.59–2.35)    | 1.10 (0.56–2.16) |
| 6                     | 928                   | 36               | 3.9        | 1.66 (1.19–2.30)    | 1.49 (1.07–2.06) |
| 7                     | 2342                  | 74               | 3.2        | 1.35 (1.07–1.70)    | 1.28 (1.01–1.61) |
| 8                     | 7597                  | 225              | 3.0        | 1.26 (1.09–1.46)    | 1.20 (1.03–1.38) |
| 9                     | 100281                | 2411             | 2.4        | 1.03 (0.95–1.11)    | 1.01 (0.94–1.09) |
| 10                    | 37016                 | 867              | 2.3        | 1.00 (Reference)    | 1.00 (Reference) |
| P for trend           |                       |                  |            |                     | <0.001           |
| Per one unit of Apgar |                       |                  |            |                     | 0.98 (0.97-0.99) |

\*Adjusted for child's sex (male vs female), child's age at EDI completion (years), socioeconomic status (1st quintile, 2nd quintile, 3rd quintile, 4th quintile vs 5th quintile) child's first language (other vs English), birth order (2, 3, +4 vs 1), birth weight-for-gestational age (large, small vs appropriate), gestational age (weeks).



**Table 4. Rate ratios for developmental vulnerability according to combination of Apgar scores at one and five minutes, singleton term live births, British Columbia, Canada**

| 1-min Apgar | 5-min Apgar | Total No. of children | No. with outcome (%) | Developmental vulnerability |                  |             |
|-------------|-------------|-----------------------|----------------------|-----------------------------|------------------|-------------|
|             |             |                       |                      | Rate Ratio (95% CI)         |                  | P for trend |
|             |             |                       |                      | Crude                       | Adjusted*        |             |
| 7           | <7          | 20                    | 9 (45.0)             | 1.62 (0.99-2.65)            | 1.34 (0.80-2.25) |             |
| 7           | 7           | 172                   | 56 (32.6)            | 1.18 (0.93-1.48)            | 1.18 (0.94-1.47) |             |
| 7           | 8           | 1987                  | 629 (31.7)           | 1.14 (1.02-1.28)            | 1.12 (1.01-1.23) |             |
| 7           | 9           | 8700                  | 2637 (30.3)          | 1.09 (0.99-1.20)            | 1.08 (0.99-1.19) |             |
| 7           | 10          | 1140                  | 317 (27.8)           | 1.00 (Reference)            | 1.00 (Reference) | 0.024       |
| 8           | <8          | 66                    | 17 (25.8)            | 0.85 (0.56-1.28)            | 0.71 (0.47-1.07) |             |
| 8           | 8           | 1337                  | 420 (31.4)           | 1.03 (0.94-1.13)            | 1.01 (0.92-1.10) |             |
| 8           | 9           | 33255                 | 10007 (30.1)         | 0.99 (0.94-1.04)            | 0.97 (0.93-1.02) |             |
| 8           | 10          | 4013                  | 1222 (30.5)          | 1.00 (Reference)            | 1.00 (Reference) | 0.36        |
| 9           | <9          | 140                   | 48 (34.3)            | 1.17 (0.93-1.47)            | 1.10 (0.88-1.38) |             |
| 9           | 9           | 50976                 | 15501 (30.4)         | 1.03 (1.01-1.06)            | 1.03 (1.01-1.05) |             |
| 9           | 10          | 28253                 | 8303 (29.4)          | 1.00 (Reference)            | 1.00 (Reference) | 0.009       |
| 10          | <10         | 26                    | 13 (50.0)            | 1.68 (1.14-2.47)            | 1.53 (1.08-2.17) |             |
| 10          | 10          | 3057                  | 911 (29.8)           | 1.00 (Reference)            | 1.00 (Reference) | 0.016†      |

\*Adjusted for child's sex (male vs female), child's age at EDI completion (years), socioeconomic status (1st quintile, 2nd quintile, 3rd quintile, 4th quintile vs 5th quintile) child's first language (others vs English), birth order (2, 3, +4 vs 1), birth weight-for gestational age (large, small vs appropriate), gestational age (weeks).

† P value for difference in rates.



1  
2  
3  
4  
5  
6  
7  
8  
9  
10  
11  
12  
13  
14  
15  
16  
17  
18  
19  
20  
21  
22  
23  
24  
25  
26  
27  
28  
29  
30  
31  
32  
33  
34  
35  
36  
37  
38  
39  
40  
41  
42  
43  
44  
45  
46  
47  
48  
49  
50  
51  
52  
53  
54  
55  
56  
57  
58  
59  
60

**Figure 1 Legend:** Rates of vulnerability within the five Early Development Instrument domains by Apgar score at 5-minute, British Columbia, Canada

For peer review only

**Figure 1:** Rates of vulnerability within the five Early Development Instrument domains by Apgar score at 5-minute, British Columbia, Canada

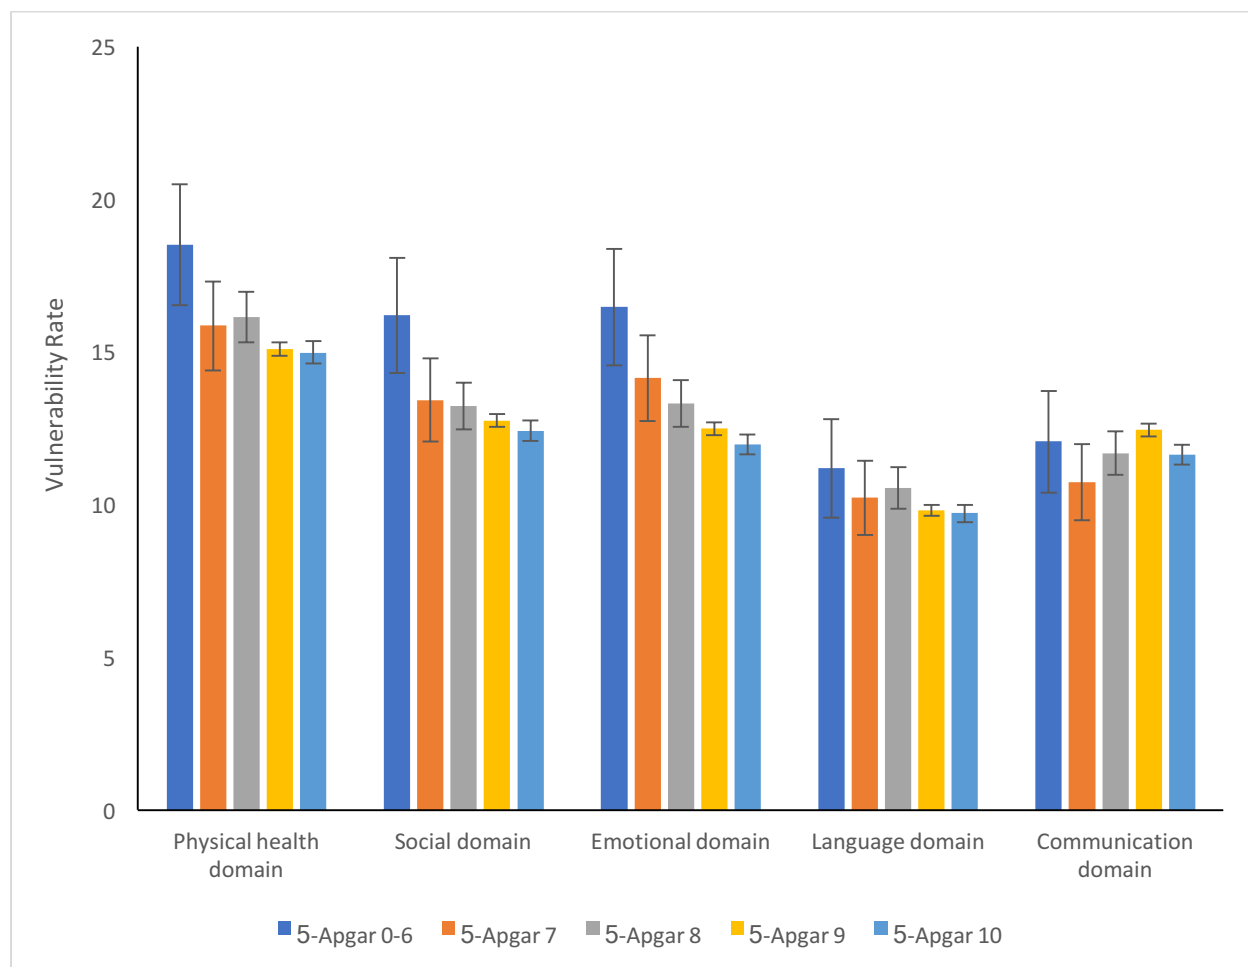

**Supplementary Table 1. Five domains of the Early Development Instrument**

| EDI domains                                | Characteristics addressed                                                                                                                                                                  |
|--------------------------------------------|--------------------------------------------------------------------------------------------------------------------------------------------------------------------------------------------|
| Physical health and well-being             | Children's fine and gross motor skills, energy levels, fatigue and clumsiness                                                                                                              |
| Social competence                          | Self-confidence, tolerance, ability to get along with other children, to accept responsibility for their own actions, to work independently                                                |
| Emotional maturity                         | Children's general emotional health and maturity. It also identifies minor problems with aggression, restlessness, distractibility or inattentiveness as well as excessive regular sadness |
| Language and cognitive skills              | Mastery of the basics of reading and writing, interest in books, and numerical skills                                                                                                      |
| Communication skills and general knowledge | Children's general knowledge, their ability to articulate clearly and their ability to understand and communicate in English                                                               |

**Supplementary Table 2. Apgar score at one and five minutes and rate ratios for vulnerability in each domain of the EDI, among singleton term live births in British Columbia, Canada**

| Apgar Score        | Physical health domain |        |                  | Social domain    |        |                  | Emotional domain |        |                  |
|--------------------|------------------------|--------|------------------|------------------|--------|------------------|------------------|--------|------------------|
|                    | No. with outcome       | %      | Adjusted*        | No. with outcome | %      | Adjusted*        | No. with outcome | %      | Adjusted*        |
| <b>1-Min Apgar</b> |                        |        |                  |                  |        |                  |                  |        |                  |
| 0                  | <5                     | <20.83 | 0.90 (0.37–2.19) | <5               | <20.83 | 1.01 (0.40–2.51) | <5               | <20.83 | 0.71 (0.25–1.96) |
| 1                  | 88                     | 18.76  | 1.24 (1.02–1.52) | 82               | 17.48  | 1.30 (1.05–1.61) | 83               | 17.7   | 1.25 (1.01–1.54) |
| 2                  | 179                    | 16.89  | 1.09 (0.93–1.27) | 142              | 13.40  | 0.97 (0.82–1.16) | 147              | 13.87  | 0.96 (0.81–1.14) |
| 3                  | 283                    | 16.08  | 1.06 (0.93–1.21) | 246              | 13.98  | 1.03 (0.89–1.19) | 273              | 15.51  | 1.09 (0.95–1.25) |
| 4                  | 410                    | 15.88  | 1.06 (0.94–1.19) | 349              | 13.52  | 1.02 (0.89–1.16) | 370              | 14.33  | 1.03 (0.91–1.18) |
| 5                  | 644                    | 15.83  | 1.04 (0.93–1.16) | 569              | 13.98  | 1.06 (0.94–1.19) | 563              | 13.84  | 1.01 (0.90–1.13) |
| 6                  | 1076                   | 15.43  | 1.02 (0.93–1.13) | 925              | 13.26  | 1.02 (0.92–1.14) | 932              | 13.36  | 1.00 (0.89–1.11) |
| 7                  | 1889                   | 15.72  | 1.03 (0.94–1.13) | 1555             | 12.94  | 1.00 (0.90–1.11) | 1500             | 12.48  | 0.94 (0.85–1.04) |
| 8                  | 5876                   | 15.19  | 1.01 (0.93–1.10) | 4993             | 12.91  | 1.01 (0.92–1.11) | 4836             | 12.51  | 0.96 (0.87–1.05) |
| 9                  | 11839                  | 14.92  | 0.99 (0.91–1.08) | 9858             | 12.42  | 0.97 (0.89–1.07) | 9608             | 12.11  | 0.94 (0.86–1.03) |
| 10                 | 472                    | 15.31  | 1.00 (Reference) | 393              | 12.75  | 1.00 (Reference) | 399              | 12.94  | 1.00 (Reference) |
| <b>5-Min Apgar</b> |                        |        |                  |                  |        |                  |                  |        |                  |
| 0                  | <5                     | <25.00 | 0.66 (0.17–2.60) | <5               | <25.00 | 1.13 (0.44–2.9)  | <5               | <25.00 | 1.13 (0.44–2.88) |
| 1                  | 6                      | 37.5   | 2.42 (1.28–4.59) | <5               | <31.25 | 1.42 (0.58–3.52) | <5               | <31.25 | 1.92 (0.89–4.11) |
| 2                  | 9                      | 32.14  | 2.22 (1.23–4.01) | 7                | 25.00  | 1.87 (0.99–3.53) | 6                | 21.43  | 1.60 (0.83–3.07) |
| 3                  | 21                     | 25.30  | 1.75 (1.22–2.51) | 15               | 18.07  | 1.37 (0.87–2.17) | 12               | 14.46  | 1.08 (0.65–1.78) |
| 4                  | 25                     | 23.58  | 1.56 (1.12–2.18) | 18               | 16.98  | 1.26 (0.84–1.90) | 18               | 16.98  | 1.19 (0.77–1.82) |
| 5                  | 46                     | 15.86  | 1.06 (0.81–1.37) | 34               | 11.72  | 0.86 (0.63–1.19) | 33               | 11.38  | 0.84 (0.61–1.17) |
| 6                  | 164                    | 17.60  | 1.13 (0.99–1.30) | 159              | 17.06  | 1.26 (1.10–1.44) | 167              | 17.92  | 1.33 (1.16–1.52) |
| 7                  | 377                    | 15.87  | 1.08 (0.98–1.19) | 319              | 13.43  | 1.05 (0.95–1.16) | 336              | 14.15  | 1.11 (1.00–1.23) |
| 8                  | 1237                   | 16.14  | 1.08 (1.02–1.14) | 1014             | 13.23  | 1.04 (0.97–1.10) | 1021             | 13.32  | 1.06 (1.00–1.13) |
| 9                  | 15272                  | 15.09  | 1.03 (1.00–1.06) | 12904            | 12.75  | 1.02 (0.99–1.06) | 12641            | 12.49  | 1.04 (1.01–1.07) |
| 10                 | 5601                   | 14.99  | 1.00 (Reference) | 4640             | 12.42  | 1.00 (Reference) | 4473             | 11.97  | 1.00 (Reference) |

**Supplementary Table 2 (cont.). Apgar score at one and five minutes and rate ratios for each domain of the EDI, among singleton term live births in British Columbia, Canada**

| Apgar Score        | Language domain  |        |                  | Communication domain |              |                  |
|--------------------|------------------|--------|------------------|----------------------|--------------|------------------|
|                    | No. with outcome | %      | Adjusted*        | No. with outcome     | %            | Adjusted*        |
| <b>1-Min Apgar</b> |                  |        |                  | <b>18335</b>         | <b>12.18</b> |                  |
| 0                  | 5                | 20.83  | 1.85 (0.81–4.25) | <5                   | <20.83       | 1.27 (0.50–3.22) |
| 1                  | 60               | 12.79  | 1.42 (1.10–1.82) | 54                   | 11.51        | 1.07 (0.83–1.39) |
| 2                  | 106              | 10.00  | 1.05 (0.86–1.29) | 131                  | 12.36        | 1.12 (0.93–1.35) |
| 3                  | 174              | 9.89   | 1.07 (0.90–1.27) | 203                  | 11.53        | 1.05 (0.90–1.23) |
| 4                  | 269              | 10.42  | 1.14 (0.98–1.32) | 291                  | 11.27        | 1.04 (0.90–1.19) |
| 5                  | 435              | 10.69  | 1.14 (1.00–1.31) | 486                  | 11.94        | 1.10 (0.97–1.24) |
| 6                  | 733              | 10.51  | 1.13 (1.00–1.28) | 803                  | 11.51        | 1.07 (0.96–1.20) |
| 7                  | 1255             | 10.44  | 1.10 (0.98–1.23) | 1440                 | 11.98        | 1.08 (0.97–1.20) |
| 8                  | 3830             | 9.90   | 1.04 (0.93–1.16) | 4711                 | 12.18        | 1.04 (0.95–1.15) |
| 9                  | 7621             | 9.60   | 0.99 (0.89–1.10) | 9779                 | 12.32        | 1.00 (0.91–1.10) |
| 10                 | 305              | 9.89   | 1.00 (Reference) | 372                  | 12.07        | 1.00 (Reference) |
| <b>5-Min Apgar</b> |                  |        |                  |                      |              |                  |
| 0                  | 6                | 30.00  | 3.13 (1.52–6.44) | <5                   | <25.00       | 1.27 (0.43–3.70) |
| 1                  | <5               | <31.25 | 1.23 (0.38–3.92) | <5                   | <31.25       | 1.75 (0.74–4.13) |
| 2                  | 5                | 17.86  | 1.95 (0.86–4.43) | 7                    | 25.00        | 2.19 (1.09–4.41) |
| 3                  | 13               | 15.66  | 1.79 (1.11–2.91) | 14                   | 16.87        | 1.63 (1.00–2.68) |
| 4                  | 14               | 13.21  | 1.44 (0.89–2.34) | 15                   | 14.15        | 1.33 (0.84–2.12) |
| 5                  | 29               | 10.00  | 1.11 (0.78–1.57) | 29                   | 10.00        | 0.94 (0.67–1.33) |
| 6                  | 96               | 10.30  | 1.09 (0.90–1.31) | 107                  | 11.48        | 1.03 (0.87–1.23) |
| 7                  | 243              | 10.23  | 1.14 (1.01–1.29) | 255                  | 10.74        | 1.04 (0.92–1.16) |
| 8                  | 809              | 10.55  | 1.13 (1.06–1.22) | 895                  | 11.67        | 1.07 (1.00–1.14) |
| 9                  | 9939             | 9.82   | 1.04 (1.00–1.07) | 12595                | 12.45        | 1.03 (1.00–1.06) |
| 10                 | 3637             | 9.73   | 1.00 (Reference) | 4351                 | 11.64        | 1.00 (Reference) |

\*Adjusted for child's sex (male vs female), child's age at EDI completion (years), socioeconomic status (1st quintile, 2nd quintile, 3rd quintile, 4th quintile vs 5th quintile) child's first language (others vs English), birth order (2, 3, +4 vs 1), birth weight-for-gestational age (large, small vs appropriate), gestational age (weeks).

## STROBE Statement—checklist of items that should be included in reports of observational studies

|                              | Item No | Recommendation                                                                                                                                                                                                                                                                                                                                                                                                                                                                                                                                                                                                                                                                                                       |
|------------------------------|---------|----------------------------------------------------------------------------------------------------------------------------------------------------------------------------------------------------------------------------------------------------------------------------------------------------------------------------------------------------------------------------------------------------------------------------------------------------------------------------------------------------------------------------------------------------------------------------------------------------------------------------------------------------------------------------------------------------------------------|
| <b>Title and abstract</b>    | 1       | (a) Indicate the study's design with a commonly used term in the title or the abstract (Page 1 and 2)<br>(b) Provide in the abstract an informative and balanced summary of what was done and what was found (Page 2)                                                                                                                                                                                                                                                                                                                                                                                                                                                                                                |
| <b>Introduction</b>          |         |                                                                                                                                                                                                                                                                                                                                                                                                                                                                                                                                                                                                                                                                                                                      |
| Background/rationale         | 2       | Explain the scientific background and rationale for the investigation being reported (Page 3, paragraph 1 and 2)                                                                                                                                                                                                                                                                                                                                                                                                                                                                                                                                                                                                     |
| Objectives                   | 3       | State specific objectives, including any prespecified hypotheses (Page 4, paragraph 2)                                                                                                                                                                                                                                                                                                                                                                                                                                                                                                                                                                                                                               |
| <b>Methods</b>               |         |                                                                                                                                                                                                                                                                                                                                                                                                                                                                                                                                                                                                                                                                                                                      |
| Study design                 | 4       | Present key elements of study design early in the paper (Page 4, para 1)                                                                                                                                                                                                                                                                                                                                                                                                                                                                                                                                                                                                                                             |
| Setting                      | 5       | Describe the setting, locations, and relevant dates, including periods of recruitment, exposure, follow-up, and data collection (Page 6 to 9)                                                                                                                                                                                                                                                                                                                                                                                                                                                                                                                                                                        |
| Participants                 | 6       | (a) <i>Cohort study</i> —Give the eligibility criteria, and the sources and methods of selection of participants. Describe methods of follow-up (Page 4 to 7)<br><i>Case-control study</i> —Give the eligibility criteria, and the sources and methods of case ascertainment and control selection. Give the rationale for the choice of cases and controls<br><i>Cross-sectional study</i> —Give the eligibility criteria, and the sources and methods of selection of participants<br>(b) <i>Cohort study</i> —For matched studies, give matching criteria and number of exposed and unexposed (n/a)<br><i>Case-control study</i> —For matched studies, give matching criteria and the number of controls per case |
| Variables                    | 7       | Clearly define all outcomes, exposures, predictors, potential confounders, and effect modifiers. Give diagnostic criteria, if applicable (Page 4 to 7)                                                                                                                                                                                                                                                                                                                                                                                                                                                                                                                                                               |
| Data sources/<br>measurement | 8*      | For each variable of interest, give sources of data and details of methods of assessment (measurement). Describe comparability of assessment methods if there is more than one group (Page 4 to 7)                                                                                                                                                                                                                                                                                                                                                                                                                                                                                                                   |
| Bias                         | 9       | Describe any efforts to address potential sources of bias (n/a)                                                                                                                                                                                                                                                                                                                                                                                                                                                                                                                                                                                                                                                      |
| Study size                   | 10      | Explain how the study size was arrived at (n/a)                                                                                                                                                                                                                                                                                                                                                                                                                                                                                                                                                                                                                                                                      |
| Quantitative variables       | 11      | Explain how quantitative variables were handled in the analyses. If applicable, describe which groupings were chosen and why (Page 6 to 7)                                                                                                                                                                                                                                                                                                                                                                                                                                                                                                                                                                           |
| Statistical methods          | 12      | (a) Describe all statistical methods, including those used to control for confounding (Page 6 to 7)<br>(b) Describe any methods used to examine subgroups and interactions (n/a)<br>(c) Explain how missing data were addressed (n/a)<br>(d) <i>Cohort study</i> —If applicable, explain how loss to follow-up was addressed<br><i>Case-control study</i> —If applicable, explain how matching of cases and controls was addressed                                                                                                                                                                                                                                                                                   |

1  
2  
3  
4  
5  
6  
7  
8  
9  
10  
11  
12  
13  
14  
15  
16  
17  
18  
19  
20  
21  
22  
23  
24  
25  
26  
27  
28  
29  
30  
31  
32  
33  
34  
35  
36  
37  
38  
39  
40  
41  
42  
43  
44  
45  
46  
47  
48  
49  
50  
51  
52  
53  
54  
55  
56  
57  
58  
59  
60

*Cross-sectional study*—If applicable, describe analytical methods taking account of sampling strategy

---

(e) Describe any sensitivity analyses

Continued on next page

For peer review only

## Results

|                  |     |                                                                                                                                                                                                                                                                                                                                                                                                                                             |
|------------------|-----|---------------------------------------------------------------------------------------------------------------------------------------------------------------------------------------------------------------------------------------------------------------------------------------------------------------------------------------------------------------------------------------------------------------------------------------------|
| Participants     | 13* | (a) Report numbers of individuals at each stage of study—eg numbers potentially eligible, examined for eligibility, confirmed eligible, included in the study, completing follow-up, and analysed ( <a href="#">Page 7, para 1</a> )<br>(b) Give reasons for non-participation at each stage ( <a href="#">n/a</a> )<br>(c) Consider use of a flow diagram                                                                                  |
| Descriptive data | 14* | (a) Give characteristics of study participants (eg demographic, clinical, social) and information on exposures and potential confounders ( <a href="#">Page 7 and 8</a> )<br>(b) Indicate number of participants with missing data for each variable of interest<br>(c) <i>Cohort study</i> —Summarise follow-up time (eg, average and total amount)                                                                                        |
| Outcome data     | 15* | <i>Cohort study</i> —Report numbers of outcome events or summary measures over time ( <a href="#">Page 7 and 8</a> )<br><i>Case-control study</i> —Report numbers in each exposure category, or summary measures of exposure<br><i>Cross-sectional study</i> —Report numbers of outcome events or summary measures                                                                                                                          |
| Main results     | 16  | (a) Give unadjusted estimates and, if applicable, confounder-adjusted estimates and their precision (eg, 95% confidence interval). Make clear which confounders were adjusted for and why they were included ( <a href="#">Page 8 -9</a> )<br>(b) Report category boundaries when continuous variables were categorized<br>(c) If relevant, consider translating estimates of relative risk into absolute risk for a meaningful time period |
| Other analyses   | 17  | Report other analyses done—eg analyses of subgroups and interactions, and sensitivity analyses                                                                                                                                                                                                                                                                                                                                              |

## Discussion

|                  |    |                                                                                                                                                                                                              |
|------------------|----|--------------------------------------------------------------------------------------------------------------------------------------------------------------------------------------------------------------|
| Key results      | 18 | Summarise key results with reference to study objectives ( <a href="#">Page 9, last para</a> )                                                                                                               |
| Limitations      | 19 | Discuss limitations of the study, taking into account sources of potential bias or imprecision. Discuss both direction and magnitude of any potential bias ( <a href="#">Page 11</a> )                       |
| Interpretation   | 20 | Give a cautious overall interpretation of results considering objectives, limitations, multiplicity of analyses, results from similar studies, and other relevant evidence ( <a href="#">Page 10 to 11</a> ) |
| Generalisability | 21 | Discuss the generalisability (external validity) of the study results                                                                                                                                        |

## Other information

|         |    |                                                                                                                                                                                          |
|---------|----|------------------------------------------------------------------------------------------------------------------------------------------------------------------------------------------|
| Funding | 22 | Give the source of funding and the role of the funders for the present study and, if applicable, for the original study on which the present article is based ( <a href="#">Page 1</a> ) |
|---------|----|------------------------------------------------------------------------------------------------------------------------------------------------------------------------------------------|

\*Give information separately for cases and controls in case-control studies and, if applicable, for exposed and unexposed groups in cohort and cross-sectional studies.

**Note:** An Explanation and Elaboration article discusses each checklist item and gives methodological background and published examples of transparent reporting. The STROBE checklist is best used in conjunction with this article (freely available on the Web sites of PLoS Medicine at <http://www.plosmedicine.org/>, Annals of Internal Medicine at <http://www.annals.org/>, and Epidemiology at <http://www.epidem.com/>). Information on the STROBE Initiative is available at [www.strobe-statement.org](http://www.strobe-statement.org).



# BMJ Open

## 1 and 5 minutes Apgar scores and child developmental health at 5 years of age, a population-based cohort study in British Columbia, Canada

|                                 |                                                                                                                                                                                                                                                                                                                                                                           |
|---------------------------------|---------------------------------------------------------------------------------------------------------------------------------------------------------------------------------------------------------------------------------------------------------------------------------------------------------------------------------------------------------------------------|
| Journal:                        | <i>BMJ Open</i>                                                                                                                                                                                                                                                                                                                                                           |
| Manuscript ID                   | bmjopen-2018-027655.R1                                                                                                                                                                                                                                                                                                                                                    |
| Article Type:                   | Research                                                                                                                                                                                                                                                                                                                                                                  |
| Date Submitted by the Author:   | 06-Jan-2019                                                                                                                                                                                                                                                                                                                                                               |
| Complete List of Authors:       | Razaz, Neda; Karolinska Institutet, Cnattingius, Sven; Karolinska Institute, Department of Medicine, Solna Persson, Martina; Karolinska Institute Tedroff, Kristina; Karolinska Institutet, Women's and Children's Health Lisonkova, Sarka; University British Columbia, Obstetrics and Gynaecology Joseph, K; University of British Columbia, Obstetrics and Gynaecology |
| <b>Primary Subject Heading</b>: | Paediatrics                                                                                                                                                                                                                                                                                                                                                               |
| Secondary Subject Heading:      | Epidemiology                                                                                                                                                                                                                                                                                                                                                              |
| Keywords:                       | NEONATOLOGY, EPIDEMIOLOGY, Fetal medicine < OBSTETRICS, PAEDIATRICS, Developmental neurology & neurodisability < PAEDIATRICS                                                                                                                                                                                                                                              |
|                                 |                                                                                                                                                                                                                                                                                                                                                                           |

SCHOLARONE™  
Manuscripts

1  
2  
3  
4  
5  
6 **1 and 5 minutes Apgar scores and child developmental health at 5 years of age, a population-**  
7 **based cohort study in British Columbia, Canada**

8  
9 Neda Razaz, MPH, PhD;<sup>1</sup> Sven Cnattingius, MD, PhD;<sup>1</sup> Martina Persson, MD, PhD;<sup>1</sup> Kristina  
10 Tedroff, MD, PhD;<sup>2</sup> Sarka Lisonkova, MD, PhD;<sup>3</sup> K.S. Joseph, MD, PhD<sup>3</sup>

11  
12  
13 **Affiliation:** <sup>1</sup> Department of Medicine, Solna, Clinical Epidemiology Unit, Karolinska Institutet,  
14 Stockholm, Sweden. <sup>2</sup> Department of Women's and Children's Health, Neuropediatric unit,  
15 Karolinska Institutet, Stockholm, Sweden. <sup>3</sup> Department of Obstetrics & Gynaecology, School of  
16 Population and Public Health, University of British Columbia and the Children's and Women's  
17 Hospital of British Columbia, Vancouver, Canada

18  
19  
20 **Address correspondence to:** Dr. Neda Razaz, Clinical Epidemiology Unit, Department of  
21 Medicine Solna, Karolinska University Hospital, Karolinska Institutet, SE-171 76 Stockholm,  
22 Sweden. [[neda.razaz@gmail.com](mailto:neda.razaz@gmail.com)] +46 851776181

23  
24 **Funding statement:** No funding.

25  
26 **Role of the funder:** None.

27  
28  
29 **Financial Disclosure:** NR is supported by a postdoctoral fellowship award from the Canadian  
30 Institutes of Health Research (CIHR). KSJ is supported by the BC Children's Hospital Research  
31 Institute.

32  
33  
34 **Conflict of interest:** The authors have no potential conflicts of interest to disclose.

35  
36 **Short title:** Apgar scores and child developmental health

## ABSTRACT

**Objectives:** We investigated the associations between Apgar scores at 1 and 5 minutes, across the entire range of score values, and child developmental health at 5 years of age.

**Setting:** British Columbia, Canada.

**Participants:** All singleton term infants without major congenital anomalies born between 1993 and 2009, who had a developmental assessment in kindergarten between 1999 and 2014.

**Main outcomes and measures:** Developmental vulnerability on one or more domains of the Early Development Instrument and special needs requirements. Adjusted rate ratios (aRRs) and 95% confidence intervals (CIs) were estimated using log-linear regression.

**Results:** Of the 150,081 children in the study, 45,334 (30.2%) were developmentally vulnerable and 3,644 (2.5%) had special needs. There was an increasing trend in developmental vulnerability and special needs with decreasing 1-minute and 5-minute Apgar scores. Compared with children with an Apgar score of 10 at 5-minute, the aRR for developmental vulnerability increased steadily with decreasing Apgar score from 1.02 (95% CI 1.00-1.04) for an Apgar score of 9 to 1.88 (95% CI 1.27-2.77) for an Apgar score of one. Among children with 1-minute Apgar scores in the 7-10 range, changes in Apgar scores between 1 and 5 minutes were associated with significant differences in developmental vulnerability. Compared with children who had an Apgar score of 9 at 1-minute and 10 at 5-minute, children with an Apgar score of 9 at both 1 and 5 minutes had higher rates of developmental vulnerability (aRR 1.03, 95%CI 1.01-1.05). Compared with infants with an Apgar of 10 at both 1 and 5 minutes, infants with a 1-minute score of 10 and a 5-minute score of <10 had higher rates of developmental vulnerability (aRR 1.53, 95% CI 1.08-2.17).

**Conclusion:** Risks of adverse developmental health and having special needs at 5 years of age are inversely associated with 1-minute and 5-minute Apgar scores across their entire range.

1  
2  
3  
4  
5  
6  
7  
8  
9  
10  
11  
12  
13  
14  
15  
16  
17  
18  
19  
20  
21  
22  
23  
24  
25  
26  
27  
28  
29  
30  
31  
32  
33  
34  
35  
36  
37  
38  
39  
40  
41  
42  
43  
44  
45  
46  
47  
48  
49  
50  
51  
52  
53  
54  
55  
56  
57  
58  
59  
60

For peer review only

1  
2  
3 **Article Summary:**  
4

5 **Strengths and limitations of this study:**  
6

- 7
- 8 • Ability to access comprehensive health and education-related databases at the population  
9 level.  
10
  - 11 • Using a teacher reported instrument, no reliance was placed on parent or self-report of  
12 developmental health.  
13
  - 14 • There may be some individual differences in teachers' ability to evaluate developmental  
15 health on the Early Development Instrument.  
16
  - 17 • Study was restricted to the comparatively healthy subset of all term live births, as children  
18 with disabilities may not have enrolled in kindergarten.  
19  
20  
21  
22  
23  
24  
25  
26  
27  
28  
29  
30  
31  
32  
33  
34  
35  
36  
37  
38  
39  
40  
41  
42  
43  
44  
45  
46  
47  
48  
49  
50  
51  
52  
53  
54  
55  
56  
57  
58  
59  
60

## INTRODUCTION

In 1953, Virginia Apgar proposed a scoring system that enabled a rapid assessment of the clinical status of the newborn infant and identified infants requiring resuscitation on the basis of heart rate, respiration, color, muscle tone and reflex irritability.<sup>1</sup> Initially, the Apgar score at 1-minute was used to assess the need for immediate resuscitation. Subsequently, the Apgar score at 5-minute was shown to be a better predictor of neonatal survival than the Apgar score at 1-minute. Although the value of a low Apgar score for accurately predicting adverse neurologic outcomes at the individual level has been questioned,<sup>2,3</sup> low Apgar scores are well correlated with both short-term<sup>4</sup> and long-term outcomes, in both preterm and term infants.<sup>5-11</sup>

Only the lowest and more compromised Apgar scores have been conventionally regarded as predictive of maladaptive development and morbidity. Nevertheless, a few population-based studies have shown that risks of cerebral palsy, epilepsy, early developmental health status and need for special education are inversely associated with 5-minute Apgar scores in a dose-dependent manner across the entire range of scores.<sup>12-14</sup> Even children with an Apgar score of 9 at 5 or 10 minutes have an increased risk of adverse neurological outcomes compared with children with 5 or 10 minutes Apgar scores of 10.<sup>12,13</sup> Although approximately 65% to 85% of newborns receive a 1-minute or a 5-minute Apgar score in the 7 to 9 range,<sup>13</sup> there is a dearth of information on how this impacts a child's developmental health.

Changes in Apgar score values between 1 and 5 minutes, and between 5 and 10 minutes are known to influence risks of cerebral palsy and epilepsy.<sup>12,15,16</sup> Our recent population-based study demonstrated elevated risks of cerebral palsy and epilepsy among children with a 5-minute Apgar score of 7 or 8, even if their 10-minute Apgar score was 9 or 10.<sup>12</sup> Although it is recognized that

1  
2 changes in Apgar scores between 1 and 5 minutes are a useful measure of the response to  
3  
4 resuscitation, the long-term significance of changes in such Apgar scores within the “normal”  
5  
6 range (i.e., 7-10) is not clear.  
7  
8  
9

10  
11 In this population-based study, we investigated the associations between Apgar scores at 1 and 5  
12  
13 minutes across the entire range of score values, and developmental health at 5 years of age. We  
14  
15 also analyzed the effect of a change in Apgar scores from 1 to 5 minutes, including changes within  
16  
17 the normal range of Apgar scores. Specifically, we were interested in developmental health among  
18  
19 children with 1-minute Apgar score in the 7-9 range who received a score less than 10 at 5-minute.  
20  
21  
22  
23  
24

## 25 **METHODS**

26  
27 Information on the study population was obtained from several population-based linked health and  
28  
29 demographic databases in British Columbia. The anonymized linked data used in this study  
30  
31 included information from the Discharge Abstract Database<sup>17</sup> that comprised hospital admission  
32  
33 and discharge records; the Vital Statistics Birth and Clinical Births<sup>18</sup> databases, which contained  
34  
35 information on all births in the province, along with delivery and neonatal health status, including  
36  
37 diagnoses based on International Classification of Diseases (ICD 9 or ICD-10CA) codes; Census  
38  
39 GeoData, which provided socioeconomic status (SES) data expressed as average neighbourhood  
40  
41 income quintiles (based on Census information from Statistics Canada and quantified using postal  
42  
43 codes);<sup>19</sup> the Consolidation File,<sup>20</sup> which provided demographic information on study subjects and  
44  
45 confirmed residency in the province; and the Early Development Instrument (EDI)<sup>21</sup> data, which  
46  
47 provided information on early childhood developmental health, and were accessed through linkage  
48  
49 with the Human Early Learning Partnership.<sup>22</sup> The EDI has been routinely administered province-  
50  
51 wide in British Columbia every one to three years since the 1999/2000 school year, achieving at  
52  
53  
54  
55  
56  
57  
58  
59  
60

1  
2 least 85% participation of kindergarten children from each school district. Teachers completed the  
3 EDI for each child in their kindergarten class (age range 5-7 years) in February. The EDI is  
4 designed to tap five core areas of early childhood development:<sup>21,23</sup> physical health and well-being;  
5 social competence; emotional maturity; language and cognitive development; and communication  
6 skills and general knowledge (Supplementary Table 1).<sup>21</sup> It consists of 104 binary and Likert-scale  
7 items, from which scores between 0 and 10 are calculated for each domain. The EDI also records  
8 demographic information on each child and whether the child has identified special needs.  
9  
10  
11  
12  
13  
14  
15  
16  
17  
18  
19  
20

21 The study population included all singleton term ( $\geq 37$  weeks' gestation) infants born between April  
22 1, 1993 and December 31, 2009, who had documented 1-minute and 5-minute Apgar scores as well  
23 as a completed EDI assessment in kindergarten. Inclusion of infants with these birth dates meant  
24 that children were 5 to 7 years of age between 1999 and 2014 and part of the EDI assessment. The  
25 study population was restricted to infants without major congenital anomalies, identified using  
26 diagnosis codes from linked hospital records in the year after birth.  
27  
28  
29  
30  
31  
32  
33  
34  
35  
36

37 Apgar scores at 1 and 5 minutes were considered as the main exposures and examined both as  
38 discrete values from 0 to 10 and also as grouped categories (Apgar values of 0-3, 4-6, 7, 8, 9, and  
39 10). Children with an Apgar score of 0 at 1 or 5 minutes who did not have a diagnostic code for  
40 birth asphyxia [ICD-9: 768.5, 768.6 and 768.9; ICD-10: P21], or an intervention code for either  
41 resuscitation or ventilation (Canadian Classification of health interventions: 1.GZ.30, 1.GZ31,  
42 1.HZ.30, 1361, 1362, 1363, 1373, 1379, 1004) were excluded from the study (n=470), as  
43 information on these cases likely resulted from transcription errors.  
44  
45  
46  
47  
48  
49  
50  
51  
52  
53  
54

55 Developmental health included whether a child had special needs or was developmentally  
56  
57  
58  
59  
60



1  
2  
3 vulnerable as measured by the EDI. Children were categorized as being developmentally  
4  
5 vulnerable if their scores on the EDI fell below the 10<sup>th</sup> percentile value<sup>24</sup> in any of the five  
6  
7 domains, based on the national EDI cut-off scores.<sup>25</sup> The 10<sup>th</sup> percentile cut-off has been  
8  
9 recommended because it is usually higher than clinical cut-off points of 3% or 5% for diagnosing  
10  
11 developmental delay.<sup>21</sup> Developmentally vulnerable children may not manifest developmental  
12  
13 delays but may be at risk of experiencing challenges in school and society without additional  
14  
15 support and care.<sup>26</sup> Children with special needs were defined as requiring special assistance  
16  
17 because of chronic medically, physically, or intellectually disabling conditions.  
18  
19  
20  
21  
22

23  
24 Other independent variables included infant sex (male vs female), birth weight-for-gestational age,  
25  
26 age of the child in years at the time of EDI assessment, gestational age at birth in completed weeks  
27  
28 (37, 38, 39, 40, 41, and  $\geq 42$ ), birth order (1, 2, 3, and +4), marital status (married vs not married)  
29  
30 and socioeconomic status (SES). Birth weight-for-gestational age was categorized as: small (<10<sup>th</sup>  
31  
32 percentile), appropriate (10<sup>th</sup>-90<sup>th</sup> percentile) and large (>90<sup>th</sup> percentile) for gestational age.<sup>27</sup> Each  
33  
34 child's family income was derived from the median household income in the child's residential  
35  
36 area (based on postal code) obtained from the 2006 Canadian Census data.<sup>28-30</sup>  
37  
38  
39  
40  
41

42  
43 The frequency of each 5-minute Apgar score value was calculated within categories of maternal  
44  
45 and infant characteristics. Multivariable log-linear regression models with robust variance  
46  
47 estimates<sup>31</sup> was used to examine the association between Apgar score at 1 and 5 minutes and  
48  
49 developmental vulnerability and special needs. Results were expressed as crude and adjusted rate  
50  
51 ratios (aRR) with 95% confidence intervals (CI). Other variables included in the final models were  
52  
53 based on the literature<sup>24,32</sup> or statistical significance (P value <0.1). The full model included child's  
54  
55 sex, child's age at EDI completion, socioeconomic status, child's first language, birth weight-for-  
56  
57  
58  
59  
60

1  
2 gestational age, birth order, and gestational age. Interactions between Apgar scores and other  
3  
4 determinants were examined and stratified analyses were carried out when a significant interaction  
5  
6 was present. The University of British Columbia's Clinical Research Ethics Board approved the  
7  
8 study.  
9  
10

### 11 12 13 14 **Patient and public involvement** 15

16 No patients were involved in setting the research question or the outcome measures, nor were they  
17  
18 involved in developing plans for or implementation of the study. No patients were asked to advise  
19  
20 on interpretation of the findings.  
21  
22

### 23 24 25 **RESULTS** 26

27 There were 150,081 children (mean age = 5.7 years) with a gestational age at birth of  $\geq 37$  weeks,  
28  
29 without major malformations and complete Apgar and EDI data included in the study. Information  
30  
31 on special needs was available in 148,699 (99.1%) children. Five-minute Apgar scores showed a  
32  
33 U-shaped association with gestational age at birth, with low scores more frequent at 37 weeks and  
34  
35  $\geq 42$  weeks (Table 1). Low 5-minute Apgar scores were comparable for most characteristics but  
36  
37 more frequent among males, small-for-gestational age live births, children of mothers who were  
38  
39 nulliparous, not married and those with a low SES.  
40  
41  
42  
43

44  
45  
46 Overall, the prevalence of vulnerability in one or more domains of the EDI was 30.2%, with  
47  
48 physical and social domains having the highest rates of vulnerability at 15.2% and 12.7%,  
49  
50 respectively (Figure 1). There was an increasing trend in the rate of developmental vulnerability  
51  
52 with decreasing 1-minute and 5-minute Apgar scores (P for trend  $< 0.001$ ; Table 2). However, this  
53  
54 association was much more pronounced for the 5-minute Apgar score. Compared with children  
55  
56  
57  
58  
59  
60

1  
2  
3 with an Apgar score of 10 at 5-minute, children with a 5-minute Apgar score of 2 had a 57% higher  
4  
5 rate of developmental vulnerability (aRR 1.57, 95% CI 1.03-2.39). Similarly, children with a 5-  
6  
7 minute Apgar score of 7, 8 or 9 had significantly higher rates of developmental vulnerability  
8  
9 compared with children with a 5-minute Apgar score of 10 (aRR 1.08, 1.06 and 1.02 for Apgar 7, 8  
10  
11 and 9, respectively; Table 2). The association between 5-minute Apgar scores and developmental  
12  
13 vulnerability was mainly due to the higher rates of vulnerability in the language and emotional  
14  
15 domains of the EDI (Supplementary Table 2).  
16  
17

18  
19  
20  
21 In total, 3,644 (2.5%) children had special needs (Table 3). The proportion of children with special  
22  
23 needs increased linearly with decreasing 1-minute and 5-minute Apgar scores (P for trend <0.001).  
24  
25 Compared with children who had a 1-minute Apgar score of 10, those with an Apgar score of 2 at  
26  
27 1-minute had significantly higher adjusted rates of having special needs (aRR 1.72, 95% CI 1.19-  
28  
29 2.48), while those with an Apgar score of 5 at 1-minute had 1.39 times the rate of having special  
30  
31 needs (95% CI 1.05-1.85). Children with 5-minute Apgar scores in the 1 to 8 range had higher  
32  
33 adjusted rates for having special needs which consistently increased with decreasing 5-minute  
34  
35 Apgar score values: from 1.20 in children with an Apgar score of 8 at 5-minute to 5.13 among  
36  
37 those with an Apgar score of 1 at 5-minute. The adjusted risk ratios for having special needs among  
38  
39 children with 1 and 5 minutes Apgar scores in the 0-3 range had wide 95% confidence intervals  
40  
41 because of small numbers of children in these categories.  
42  
43  
44  
45  
46  
47

48  
49 Table 4 shows rates of developmental vulnerability in relation to changes in Apgar score from 1 to  
50  
51 5 minutes, among children whose 1-minute Apgar score was in the normal range (7 to 10). Among  
52  
53 children with a 1-minute Apgar score of 7, the rate of developmental vulnerability decreased in a  
54  
55 dose-response manner with greater improvement in the Apgar score from 1 to 5 minutes (P value  
56  
57  
58  
59  
60

1  
2 for dose response = 0.02). Larger reductions in developmental vulnerability with greater  
3  
4 improvements in 1 to 5 minutes Apgar scores were also evident among children with a 1-minute  
5  
6 Apgar score of 9 (P value for trend 0.009) but not among children with a 1-minute Apgar score of 8  
7  
8 (P for trend 0.36). Children with an Apgar score of 9 at 1-minute and 9 at 5-minute had higher rates  
9  
10 of developmental vulnerability compared with those who had Apgar scores of 9 at 1-minute and 10  
11  
12 at 5-minutes (aRR 1.03, 95% CI 1.01-1.05). Furthermore, compared with children who had Apgar  
13  
14 scores of 10 at both 1 and 5 minutes, children whose 1-minute Apgar score decreased from 10 to a  
15  
16 5-minute Apgar score of <10, had 1.53 times the rate of developmental vulnerability (aRR 1.53,  
17  
18 95% CI 1.08-2.17).  
19  
20  
21  
22  
23  
24

## 25 **DISCUSSION**

26  
27 In this population-based study, we found graded, continuously increasing risks of developmental  
28  
29 vulnerability and special needs at 5 years of age with decreasing 1- and 5-minute Apgar scores. A  
30  
31 low Apgar score at 5-minute was more strongly associated with developmental vulnerability and  
32  
33 special needs than a low Apgar score at 1-minute. In particular, children with “normal” 5-minute  
34  
35 Apgar scores of 7, 8 and 9 were more likely to have developmental vulnerability compared with  
36  
37 children with 5-minute Apgar scores of 10. Similarly, children who had Apgar scores of 7 or 8 at 5  
38  
39 minutes had higher risks of having special needs compared with those with a 5-minute Apgar score  
40  
41 of 10. Furthermore, children with a 1-minute Apgar score in the normal range (7 to 10) had an  
42  
43 increased risk of developmental vulnerability, if their Apgar score at 5-minute was <10.  
44  
45 Particularly noteworthy was a reduction in the Apgar score from 10 at 1-minute to 7-9 at 5-minute,  
46  
47 as this substantially increased the risk of developmental vulnerability.  
48  
49  
50  
51  
52  
53  
54  
55  
56  
57  
58  
59  
60

1  
2  
3 Our results confirm previous findings from a smaller cohort, which showed that developmental  
4  
5 adversity extended in a linear fashion across the full range of Apgar scores.<sup>13</sup> Both research and  
6  
7 clinical practice generally emphasize the increased risks of adverse outcomes associated with very  
8  
9 low and less common Apgar scores (i.e., <7 or <4). Our results suggest that the negative  
10  
11 association between Apgar score and developmental adversity or special needs extends across the  
12  
13 full range of scores. Consistent with our findings, previous studies have shown a significant linear  
14  
15 relationship between each one-point decrease in 5 and 10 minutes Apgar scores and increasing risk  
16  
17 of epilepsy, cerebral palsy, and needing education in a special school.<sup>12,14</sup> While profound perinatal  
18  
19 events can cause death or obvious neurological deficits, milder insults may sometimes cause subtle  
20  
21 cognitive impairment only detectable as the child grows older, and apparent only at a population  
22  
23 level.  
24  
25  
26  
27  
28  
29

30 Our study also showed that changes in Apgar scores from 1 to 5 minutes were associated with  
31  
32 developmental vulnerability. This is in agreement with previous studies showing that changes in  
33  
34 Apgar scores immediately after birth influence risks of cerebral palsy and epilepsy.<sup>12,15,16</sup> To our  
35  
36 knowledge, this is the first study that examined risks of developmental adversity in relation to  
37  
38 changes in Apgar scores from 1 to 5 minutes. Current guidelines define “normal” Apgar scores as 7  
39  
40 or more at 1-minute and 8 or more at 5-minute, indicating that the baby does not require assistance  
41  
42 if scores are within these ranges.<sup>33</sup> However, our results reveal that lower scores within the normal  
43  
44 range (7-9) and even a slight reduction in score from 10 at 1-minute to 9 at 5-minute are both  
45  
46 associated with a significant increase in the risk of developmental vulnerability. Similarly, infants  
47  
48 who have low Apgar scores for prolonged, or even brief periods are reported to have a higher risk  
49  
50 of poor IQ scores at age 18, even if the infants recover subsequently.<sup>6</sup> The higher developmental  
51  
52 vulnerability observed among infants whose optimal Apgar score (of 10) at 1-minute falls with  
53  
54  
55  
56  
57  
58  
59  
60

1  
2  
3 time after birth may be important clinically; such a progression may indicate problems with  
4  
5 circulatory, respiratory or central nervous system changes that are associated with birth.

6  
7 Deterioration in the Apgar score immediately after birth, therefore, warrants re-evaluation of the  
8  
9 infant and close clinical scrutiny in order to exclude congenital abnormalities and drug induced  
10  
11 depression of the central nervous system.  
12  
13

14  
15  
16 The strengths of our study included the ability to access comprehensive health and education-  
17  
18 related databases at the population level. By using a teacher reported instrument, no reliance was  
19  
20 placed on parent or self-report of developmental health. Nonetheless, there may be some individual  
21  
22 differences in teachers' ability to evaluate developmental health on the EDI.<sup>25</sup> Further, our study  
23  
24 was restricted to the comparatively healthy subset of all term live births, as children with  
25  
26 disabilities may not have enrolled in kindergarten or may have enrolled in special needs schools.  
27  
28 Furthermore, although the EDI has broad coverage across British Columbia, it is collected less  
29  
30 frequently in independent schools (30% coverage). Since parents who enroll their children in  
31  
32 independent schools tend to be more affluent, our study population may have under-represented  
33  
34 families at higher income. We recognize that the Apgar score as recorded in medical charts  
35  
36 represents routine clinical practice,<sup>34</sup> and is prone to interobserver variability,<sup>34</sup> specifically in  
37  
38 intubated newborn babies.<sup>35</sup> However, the quality of Apgar score values should not differ between  
39  
40 children with and without subsequent diagnosed developmental vulnerability. Nevertheless,  
41  
42 measurement errors inherent in routinely recorded Apgar scores (and possibly the EDI) may  
43  
44 potentially explain the lack of an evident dose-response relationship between Apgar scores and  
45  
46 developmental vulnerability. Lastly, we acknowledge that the incidence of adverse outcomes in the  
47  
48 setting of normal Apgar scores is rare and a low Apgar in the normal range is a poor predictor of  
49  
50 developmental vulnerability for the individual infant.  
51  
52  
53  
54  
55  
56  
57  
58  
59  
60

1  
2  
3  
4  
5 In summary, our study showed that the risk of developmental vulnerability and special needs at 5  
6 years of age was inversely associated with 1 and 5 minutes Apgar scores across their entire range.  
7  
8  
9 Furthermore, improvements in Apgar scores between 1 and 5 minutes among children with a 1-  
10 minute Apgar score of 7 or 9 were associated with a lower risk of developmental vulnerability.  
11  
12 These results provide clinicians with valuable prognostic information and the justification to  
13  
14 carefully monitor infants who are even mildly compromised at 1 and 5 minutes. Future studies  
15  
16 should examine the underlying mechanism by which Apgar score in the normal range could  
17  
18 influence long-term neurodevelopmental outcomes.  
19  
20  
21  
22  
23  
24  
25  
26  
27  
28  
29  
30  
31  
32  
33  
34  
35  
36  
37  
38  
39  
40  
41  
42  
43  
44  
45  
46  
47  
48  
49  
50  
51  
52  
53  
54  
55  
56  
57  
58  
59  
60

## Acknowledgment

**Funding support:** No funding.

**Role of the funder:** None.

### Contributor's statement:

Neda Razaz conceptualized and designed the study, analyzed the data, drafted the initial manuscript, and finalized the manuscript based on coauthor feedback. She had full access to all the data in the study and takes responsibility for the integrity of the data and the accuracy of the data analysis.

Sven Cnattingius, Martina Persson, Kristina Tedroff, and Sarka Lisonkova, reviewed and commented on the initial and final analyses, provided feedback on the initial draft of the manuscript and approved the final version of the manuscript.

KS Joseph assisted with conceptualization and design of the study, and reviewed and commented on the initial and final analyses, provided feedback on the initial draft of the manuscript and approved the final version of the manuscript.

**Financial disclosure:** NR is supported by a postdoctoral fellowship award from the Canadian Institutes of Health Research (CIHR). KSJ is supported by the BC Children's Hospital Research Institute.

**Conflict of interest:** None

**A data sharing statement:** No additional data available

**Disclosure:** All inferences, opinions, and conclusions drawn in this journal article are those of the authors, and do not reflect the opinions or policies of the Data Steward(s).



**REFERENCE:**

1. Apgar V. A proposal for a new method of evaluation of the newborn. *Current Research Anaesth* 1953;32:260-267.
2. Bharti B, Bharti S. A review of the Apgar score indicated that contextualization was required within the contemporary perinatal and neonatal care framework in different settings. *J Clin Epidemiol* 2005;58:121-129.
3. Newborn AAoPCoFa. The Apgar Score. *Pediatrics* 2015;136:819.
4. Li J, Cnattingus S, Gissler M, Vestergaard M, Obel C, Ahrensberg J, Olsen J. The 5-minute Apgar score as a predictor of childhood cancer: a population-based cohort study in five million children. *BMJ open* 2012;2.
5. Moore EA, Harris F, Laurens KR, Green MJ, Brinkman S, Lenroot RK, Carr VJ. Birth outcomes and academic achievement in childhood: A population record linkage study. *Journal of Early Childhood Research* 2014:1476718X13515425.
6. Odd DE, Rasmussen F, Gunnell D, Lewis G, Whitelaw A. A cohort study of low Apgar scores and cognitive outcomes. *Archives of Disease in Childhood-Fetal and Neonatal Edition* 2008;93:F115-F120.
7. Ehrenstein V, Pedersen L, Grijota M, Nielsen GL, Rothman KJ, Sørensen HT. Association of Apgar score at five minutes with long-term neurologic disability and cognitive function in a prevalence study of Danish conscripts. *BMC Pregnancy Childbirth* 2009;9:14.
8. Moster D, Lie R, Markestad T. Joint association of Apgar scores and early neonatal symptoms with minor disabilities at school age. *Archives of Disease in Childhood-Fetal and Neonatal Edition* 2002;86:F16-F21.
9. Marschik PB, Einspieler C, Garzarolli B, Prechtel HF. Events at early development: Are they associated with early word production and neurodevelopmental abilities at the preschool age? *Early Hum Dev* 2007;83:107-114.
10. Krebs L, Langhoff-Roos J, Thorngren-Jerneck K. Long-term outcome in term breech infants with low Apgar score—a population-based follow-up. *European Journal of Obstetrics & Gynecology and Reproductive Biology* 2001;100:5-8.
11. Cnattingius S, Norman M, Granath F, Petersson G, Stephansson O, Frisell T. Apgar Score Components at 5 Minutes: Risks and Prediction of Neonatal Mortality. *Paediatr Perinat Epidemiol* 2017;31:328-337.
12. Persson M, Razaz N, Tedroff K, Joseph KS, Cnattingius S. Five and 10 minute Apgar scores and risks of cerebral palsy and epilepsy: population based cohort study in Sweden. *BMJ* 2018;360.
13. Razaz N, Boyce WT, Brownell M, Jutte D, Tremlett H, Marrie RA, Joseph KS. Five-minute Apgar score as a marker for developmental vulnerability at 5 years of age. *Archives of Disease in Childhood - Fetal and Neonatal Edition* 2016;101:F114-F120.
14. Stuart A, Olausson PO, Källen K. Apgar scores at 5 minutes after birth in relation to school performance at 16 years of age. *Obstet Gynecol* 2011;118:201-208.
15. Sun Y, Vestergaard M, Pedersen CB, Christensen J, Olsen J. Apgar scores and long-term risk of epilepsy. *Epidemiology (Cambridge, Mass)* 2006;17:296-301.
16. Moster D, Lie RT, Irgens LM, Bjerkedal T, Markestad T. The association of Apgar score with subsequent death and cerebral palsy: A population-based study in term infants. *The Journal of pediatrics* 2001;138:798-803.

17. British Columbia Ministry of Health [creator] [2012]: Discharge Abstract Database (Hospital Separations). Population Data BC [publisher];Data Extract. MOH (2012).
18. British Columbia Vital Statistics Agency [creator] (2012): Vital Statistics Births. Population Data BC [publisher];Data Extract BC Vital Statistics Agency (2012).
19. Statistics Canada [creator] (2009): Statistics Canada Income Band Data. Catalogue Number: 13C0016. Population Data BC [publisher]; Population Data BC (2017).
20. British Columbia Ministry of Health [creator] [2012]: Consolidation File (MSP Registration & Premium Billing). Population Data BC [publisher];Data Extract. MOH (2012).
21. Janus M, Offord DR. Development and psychometric properties of the early development instrument (EDI): A measure of children's school readiness. *Can J Behav Sci* 2007;39:1-22.
22. Human Early Learning Partnership [creator] (2012): Early Development Instrument. Population Data BC [publisher];Data Extract. Human Early Learning Partnership. Vancouver, BC: University of British Columbia, School of Population and Public Health (2012).
23. Duncan GJ, Dowsett CJ, Claessens A, Magnuson K, Huston AC, Klebanov P, Pagani LS, Feinstein L, Engel M, Brooks-Gunn J. School readiness and later achievement. *Dev Psychol* 2007;43:1428.
24. Janus M, Duku E. The School Entry Gap: Socioeconomic, Family, and Health Factors Associated with Children's School Readiness to Learn. *Early Education* 2007;18:375-403.
25. Measuring in support of early childhood development: The Normative II report [online] 2012; The Offord Centre for Child Studies Available at: [http://www.offordcentre.com/readiness/files/updated\\_normative\\_II.pdf](http://www.offordcentre.com/readiness/files/updated_normative_II.pdf). Accessed April 1, 2013.
26. Brinkman S, Sayers M, Goldfeld S, Kline J. Population monitoring of language and cognitive development in Australia: The Australian Early Development Index. *Int J Speech Lang Pathol* 2009;11:419-430.
27. Kramer MS, Platt RW, Wen SW, Joseph K, Allen A, Abrahamowicz M, Blondel B, Bréart G. A new and improved population-based Canadian reference for birth weight for gestational age. *Pediatrics* 2001;108:e35-e35.
28. Martens P. Health Inequities in Manitoba: Is the Socioeconomic Gap in Health Widening Or Narrowing Over Time? Winnipeg: Manitoba Centre for Health Policy, University of Manitoba, 2010.
29. Mustard C, Derksen S, Berthelot J, Wolfson M. Assessing ecological proxies for household income: a comparison of household income and neighborhood level income measures in the study of population health status. *Health and Place* 1999;5:157-171.
30. Krieger N. Overcoming the absence of socioeconomic data in medical records: Validation and application of a census-based methodology. *Am J Public Health* 1992;82:703-710.
31. Zou G. A Modified Poisson Regression Approach to Prospective Studies with Binary Data. *Am J Epidemiol* 2004;159:702-706.
32. Santos R, Brownell MD, Ekuma O, Mayer T, Soodeen RA. The Early Development Instrument (EDI) in Manitoba: Linking Socioeconomic Adversity and Biological Vulnerability at Birth to Children's Outcomes at Age 5. Winnipeg, MB: Manitoba Centre for Health Policy, University of Manitoba, 2012.
33. Pediatrics AAo. The APGAR score. *Adv Neonatal Care* 2006;6:220-223.
34. O'Donnell CP, Kamlin COF, Davis PG, Carlin JB, Morley CJ. Interobserver variability of the 5-minute Apgar score. *The Journal of pediatrics* 2006;149:486-489.
35. Lopriore E, van Burk GF, Walther FJ, de Beaufort AJ. Correct use of the Apgar score for resuscitated and intubated newborn babies: questionnaire study. *BMJ* 2004;329:143-144.

1  
2  
3  
4  
5  
6  
7  
8  
9  
10  
11  
12  
13  
14  
15  
16  
17  
18  
19  
20  
21  
22  
23  
24  
25  
26  
27  
28  
29  
30  
31  
32  
33  
34  
35  
36  
37  
38  
39  
40  
41  
42  
43  
44  
45  
46  
47  
48  
49  
50  
51  
52  
53  
54  
55  
56  
57  
58  
59  
60**Table 1. Maternal and birth characteristics according to Apgar score at five minutes among singleton term live births, British Columbia, 1993-2009**

| Maternal and birth characteristics | Total          | Apgar 0-3<br>(n=147) | Apgar 4-6<br>(n=1328) | Apgar 7<br>(n=2375) | Apgar 8<br>(n=7666) | Apgar 9<br>(n=101191) | Apgar 10<br>(n=37374) |
|------------------------------------|----------------|----------------------|-----------------------|---------------------|---------------------|-----------------------|-----------------------|
|                                    | No. (%)        | %                    | %                     | %                   | %                   | %                     | %                     |
| Total                              | 150081 (100)   |                      |                       |                     |                     |                       |                       |
| Maternal age (years)               |                |                      |                       |                     |                     |                       |                       |
| ≤19                                | 6170 (4.11)    | 0.15                 | 1.41                  | 1.93                | 5.80                | 64.17                 | 26.55                 |
| 20-24                              | 24637 (16.42)  | 0.09                 | 1.11                  | 1.77                | 5.88                | 64.83                 | 26.32                 |
| 25-29                              | 43832 (29.21)  | 0.10                 | 0.88                  | 1.64                | 5.19                | 66.66                 | 25.54                 |
| 30-34                              | 47332 (31.54)  | 0.10                 | 0.80                  | 1.50                | 4.76                | 68.45                 | 24.39                 |
| ≥35                                | 28081 (18.71)  | 0.09                 | 0.72                  | 1.39                | 4.73                | 69.89                 | 23.17                 |
| Missing                            | 29 (0.02)      | 0                    | <17.24                | <17.24              | <17.24              | 58.62                 | 31.03                 |
| Socioeconomic status               |                |                      |                       |                     |                     |                       |                       |
| 5th quintile [highest]             | 27519 (18.34)  | 0.10                 | 0.90                  | 1.64                | 5.00                | 66.88                 | 25.47                 |
| 4th quintile                       | 31282 (20.84)  | 0.11                 | 0.83                  | 1.69                | 5.38                | 66.79                 | 25.21                 |
| 3rd quintile                       | 30939 (20.61)  | 0.10                 | 0.86                  | 1.65                | 5.18                | 67.47                 | 24.74                 |
| 2nd quintile                       | 31266 (20.83)  | 0.06                 | 0.84                  | 1.48                | 5.08                | 67.73                 | 24.80                 |
| 1st quintile [lowest]              | 28889 (19.25)  | 0.12                 | 1.00                  | 1.45                | 4.88                | 68.25                 | 24.30                 |
| Missing                            | 186 (0.12)     | 0                    | <2.69                 | <2.69               | 3.23                | 66.13                 | 28.49                 |
| Married                            |                |                      |                       |                     |                     |                       |                       |
| Yes                                | 103099 (68.70) | 0.09                 | 0.78                  | 1.47                | 4.73                | 68.43                 | 24.49                 |
| No                                 | 43374 (28.90)  | 0.12                 | 1.13                  | 1.85                | 6.01                | 64.93                 | 25.95                 |
| Missing                            | 3608 (2.40)    | 0.17                 | 0.89                  | 1.47                | 4.93                | 68.63                 | 23.92                 |
| Infant's sex                       |                |                      |                       |                     |                     |                       |                       |
| Female                             | 73809 (49.18)  | 0.08                 | 0.78                  | 1.46                | 4.91                | 67.17                 | 25.61                 |
| Male                               | 76272 (50.82)  | 0.12                 | 0.99                  | 1.70                | 5.30                | 67.67                 | 24.22                 |
| Birth order                        |                |                      |                       |                     |                     |                       |                       |
| 1                                  | 67516 (44.99)  | 0.12                 | 1.25                  | 2.09                | 6.13                | 67.92                 | 22.49                 |
| 2                                  | 56025 (37.33)  | 0.09                 | 0.63                  | 1.24                | 4.32                | 67.51                 | 26.22                 |
| 3                                  | 19239 (12.82)  | 0.07                 | 0.46                  | 1.05                | 4.13                | 66.66                 | 27.63                 |
| ≥4                                 | 7301 (4.86)    | <0.07                | 0.56                  | 0.99                | 4.34                | 64.17                 | 29.91                 |
| Gestational age                    |                |                      |                       |                     |                     |                       |                       |
| 37 weeks                           | 8966 (5.97)    | 0.10                 | 1.08                  | 2.02                | 6.88                | 68.02                 | 21.89                 |
| 38 weeks                           | 25821 (17.20)  | 0.05                 | 0.74                  | 1.37                | 4.67                | 68.21                 | 24.96                 |

|    |                                            |                |             |             |             |             |             |             |
|----|--------------------------------------------|----------------|-------------|-------------|-------------|-------------|-------------|-------------|
| 1  |                                            |                |             |             |             |             |             |             |
| 2  |                                            |                |             |             |             |             |             |             |
| 3  | 39 weeks                                   | 37408 (34.03)  | 0.09        | 0.76        | 1.32        | 4.36        | 68.57       | 24.89       |
| 4  | 40 weeks                                   | 51079 (34.03)  | 0.10        | 0.82        | 1.65        | 5.05        | 66.31       | 26.08       |
| 5  | 41 weeks                                   | 25040 (16.68)  | 0.15        | 1.22        | 1.87        | 6.08        | 67.38       | 23.29       |
| 6  |                                            |                |             |             |             |             |             |             |
| 7  | 42-44 weeks                                | 1767 (1.18)    | <0.28       | 1.58        | 2.09        | 6.51        | 61.35       | 28.3        |
| 8  |                                            |                |             |             |             |             |             |             |
| 9  | Birth weight-for-gestational age           |                |             |             |             |             |             |             |
| 10 | Appropriate                                | 121035 (80.65) | 0.09        | 0.84        | 1.51        | 4.96        | 67.42       | 25.18       |
| 11 | Small                                      | 11581 (7.72)   | 0.19        | 1.35        | 2.20        | 6.16        | 67.04       | 23.06       |
| 12 | Large                                      | 17445 (11.62)  | 0.08        | 0.85        | 1.65        | 5.47        | 67.76       | 24.18       |
| 13 |                                            |                |             |             |             |             |             |             |
| 14 | Missing                                    | 20 (0.01)      | <25.00      | <25.00      | 0           | 0           | 40.00       | 50.00       |
| 15 |                                            |                |             |             |             |             |             |             |
| 16 | Child's age at EDI data collection (years) |                |             |             |             |             |             |             |
| 17 |                                            |                |             |             |             |             |             |             |
| 18 | Means (SD)                                 | 5.70 (0.32)    | 5.67 (0.30) | 5.65 (0.30) | 5.66 (0.30) | 5.66 (0.30) | 5.65 (0.30) | 5.65 (0.30) |

19  
20  
21  
22  
23  
24  
25  
26  
27  
28  
29  
30  
31  
32  
33  
34  
35  
36  
37  
38  
39  
40  
41  
42  
43  
44  
45  
46  
47  
48  
49  
50  
51  
52  
53  
54  
55  
56  
57  
58  
59  
60

**Table 2. Apgar scores at one and five minutes and rate ratios for developmental vulnerability among singleton term live births, British Columbia, Canada**

| Apgar Score           | Total No. of children | No. with outcome | %           | Developmental vulnerability |                  |
|-----------------------|-----------------------|------------------|-------------|-----------------------------|------------------|
|                       |                       |                  |             | Crude                       | Adjusted*        |
| <b>1-Min Apgar</b>    | <b>150081</b>         | <b>45334</b>     | <b>30.2</b> |                             |                  |
| 0                     | 24                    | 9                | 37.5        | 1.25 (0.74–2.10)            | 1.08 (0.64–1.83) |
| 1                     | 469                   | 161              | 34.3        | 1.15 (1.00–1.31)            | 1.16 (1.02–1.32) |
| 2                     | 1060                  | 329              | 31.0        | 1.04 (0.93–1.15)            | 1.03 (0.93–1.14) |
| 3                     | 1760                  | 546              | 31.0        | 1.04 (0.95–1.13)            | 1.03 (0.95–1.13) |
| 4                     | 2582                  | 814              | 31.5        | 1.05 (0.97–1.14)            | 1.07 (0.99–1.15) |
| 5                     | 4069                  | 1261             | 31.0        | 1.03 (0.96–1.11)            | 1.05 (0.98–1.12) |
| 6                     | 6975                  | 2124             | 30.5        | 1.02 (0.95–1.08)            | 1.04 (0.98–1.11) |
| 7                     | 12019                 | 3648             | 30.4        | 1.01 (0.95–1.08)            | 1.03 (0.97–1.09) |
| 8                     | 38671                 | 11666            | 30.2        | 1.01 (0.95–1.06)            | 1.02 (0.96–1.08) |
| 9                     | 79369                 | 23852            | 30.1        | 1.00 (0.95–1.06)            | 1.00 (0.95–1.06) |
| 10                    | 3083                  | 924              | 30.0        | 1.00 (Reference)            | 1.00 (Reference) |
| P for trend           |                       |                  |             |                             | <0.001           |
| Per one unit of Apgar |                       |                  |             |                             | 0.99 (0.98-0.99) |
| <b>5-Min Apgar</b>    |                       |                  |             |                             |                  |
| 0                     | 20                    | 7                | 35.0        | 1.18 (0.65–2.15)            | 1.16 (0.62–2.17) |
| 1                     | 16                    | 9                | 56.3        | 1.90 (1.24–2.93)            | 1.88 (1.27–2.77) |
| 2                     | 28                    | 13               | 46.4        | 1.57 (1.05–2.34)            | 1.57 (1.03–2.39) |
| 3                     | 83                    | 30               | 36.2        | 1.22 (0.92–1.63)            | 1.25 (0.93–1.67) |
| 4                     | 106                   | 43               | 40.6        | 1.37 (1.09–1.73)            | 1.33 (1.06–1.67) |
| 5                     | 290                   | 85               | 29.3        | 0.99 (0.83–1.19)            | 0.98 (0.82–1.17) |
| 6                     | 932                   | 306              | 32.8        | 1.11 (1.01–1.22)            | 1.08 (0.99–1.18) |
| 7                     | 2375                  | 740              | 31.2        | 1.05 (0.99–1.12)            | 1.08 (1.01–1.14) |
| 8                     | 7666                  | 2387             | 31.1        | 1.05 (1.02–1.09)            | 1.06 (1.02–1.10) |
| 9                     | 101191                | 30668            | 30.3        | 1.03 (1.01–1.04)            | 1.02 (1.00–1.04) |
| 10                    | 37374                 | 11046            | 29.6        | 1.00 (Reference)            | 1.00 (Reference) |
| P for trend           |                       |                  |             |                             | <0.001           |
| Per one unit of Apgar |                       |                  |             |                             | 0.98 (0.97-0.99) |

\*Adjusted for child's sex (male vs female), child's age at EDI completion (years), socioeconomic status (1st quintile, 2nd quintile, 3rd quintile, 4th quintile vs 5th quintile) child's first language (other vs English), birth order (2, 3, +4 vs 1), birth weight-for-gestational age (large, small vs appropriate), gestational age (weeks).

**Table 3. Apgar score at one and five minutes and rate ratios for special needs status among singleton term live births in British Columbia, Canada**

| Apgar Score           | Total No. of children | No. with outcome | %          | Special Needs       |                  |
|-----------------------|-----------------------|------------------|------------|---------------------|------------------|
|                       |                       |                  |            | Rate Ratio (95% CI) |                  |
|                       |                       |                  |            | Crude               | Adjusted*        |
| <b>1-Min Apgar</b>    | <b>148699</b>         | <b>3644</b>      | <b>2.5</b> |                     |                  |
| 0                     | 22                    | <5               | 4.6        | 1.94 (0.28–13.4)    | 1.44 (0.23–8.97) |
| 1                     | 463                   | 26               | 5.6        | 2.40 (1.55–3.72)    | 2.23 (1.44–3.46) |
| 2                     | 1054                  | 45               | 4.3        | 1.82 (1.26–2.63)    | 1.72 (1.19–2.48) |
| 3                     | 1743                  | 53               | 3.0        | 1.30 (0.91–1.84)    | 1.23 (0.86–1.74) |
| 4                     | 2554                  | 69               | 2.7        | 1.15 (0.83–1.60)    | 1.09 (0.79–1.52) |
| 5                     | 4032                  | 136              | 3.4        | 1.44 (1.09–1.91)    | 1.39 (1.05–1.85) |
| 6                     | 6894                  | 191              | 2.8        | 1.18 (0.90–1.55)    | 1.16 (0.89–1.52) |
| 7                     | 11903                 | 298              | 2.5        | 1.07 (0.83–1.38)    | 1.06 (0.82–1.37) |
| 8                     | 38300                 | 946              | 2.5        | 1.06 (0.83–1.34)    | 1.07 (0.84–1.35) |
| 9                     | 78701                 | 1808             | 2.3        | 0.98 (0.78–1.24)    | 1.00 (0.79–1.26) |
| 10                    | 3033                  | 71               | 2.3        | 1.00 (Reference)    | 1.00 (Reference) |
| P for trend           |                       |                  |            |                     | <0.001           |
| Per one unit of Apgar |                       |                  |            |                     | 0.99 (0.98-0.99) |
| <b>5-Min Apgar</b>    |                       |                  |            |                     |                  |
| 0                     | 17                    | <5               | <29.4      | 2.51 (0.37–16.8)    | 2.59 (0.41–16.3) |
| 1                     | 15                    | <5               | <33.3      | 5.69 (1.56–20.7)    | 5.13 (1.45–18.1) |
| 2                     | 28                    | <5               | <17.9      | 6.10 (2.46–15.2)    | 5.17 (2.01–13.3) |
| 3                     | 83                    | 9                | 10.8       | 4.63 (2.49–8.61)    | 3.78 (2.03–7.02) |
| 4                     | 103                   | 7                | 6.8        | 2.90 (1.41–5.95)    | 2.59 (1.25–5.35) |
| 5                     | 289                   | 8                | 2.8        | 1.18 (0.59–2.35)    | 1.10 (0.56–2.16) |
| 6                     | 928                   | 36               | 3.9        | 1.66 (1.19–2.30)    | 1.49 (1.07–2.06) |
| 7                     | 2342                  | 74               | 3.2        | 1.35 (1.07–1.70)    | 1.28 (1.01–1.61) |
| 8                     | 7597                  | 225              | 3.0        | 1.26 (1.09–1.46)    | 1.20 (1.03–1.38) |
| 9                     | 100281                | 2411             | 2.4        | 1.03 (0.95–1.11)    | 1.01 (0.94–1.09) |
| 10                    | 37016                 | 867              | 2.3        | 1.00 (Reference)    | 1.00 (Reference) |
| P for trend           |                       |                  |            |                     | <0.001           |
| Per one unit of Apgar |                       |                  |            |                     | 0.98 (0.97-0.99) |

\*Adjusted for child's sex (male vs female), child's age at EDI completion (years), socioeconomic status (1st quintile, 2nd quintile, 3rd quintile, 4th quintile vs 5th quintile) child's first language (other vs English), birth order (2, 3, +4 vs 1), birth weight-for-gestational age (large, small vs appropriate), gestational age (weeks).

**Table 4. Rate ratios for developmental vulnerability according to combination of Apgar scores at one and five minutes, singleton term live births, British Columbia, Canada**

| 1-min Apgar | 5-min Apgar | Total No. of children | No. with outcome (%) | Developmental vulnerability |                  |             |
|-------------|-------------|-----------------------|----------------------|-----------------------------|------------------|-------------|
|             |             |                       |                      | Crude                       | Adjusted*        | P for trend |
| 7           | <7          | 20                    | 9 (45.0)             | 1.62 (0.99-2.65)            | 1.34 (0.80-2.25) |             |
| 7           | 7           | 172                   | 56 (32.6)            | 1.18 (0.93-1.48)            | 1.18 (0.94-1.47) |             |
| 7           | 8           | 1987                  | 629 (31.7)           | 1.14 (1.02-1.28)            | 1.12 (1.01-1.23) |             |
| 7           | 9           | 8700                  | 2637 (30.3)          | 1.09 (0.99-1.20)            | 1.08 (0.99-1.19) |             |
| 7           | 10          | 1140                  | 317 (27.8)           | 1.00 (Reference)            | 1.00 (Reference) | 0.024       |
| 8           | <8          | 66                    | 17 (25.8)            | 0.85 (0.56-1.28)            | 0.71 (0.47-1.07) |             |
| 8           | 8           | 1337                  | 420 (31.4)           | 1.03 (0.94-1.13)            | 1.01 (0.92-1.10) |             |
| 8           | 9           | 33255                 | 10007 (30.1)         | 0.99 (0.94-1.04)            | 0.97 (0.93-1.02) |             |
| 8           | 10          | 4013                  | 1222 (30.5)          | 1.00 (Reference)            | 1.00 (Reference) | 0.36        |
| 9           | <9          | 140                   | 48 (34.3)            | 1.17 (0.93-1.47)            | 1.10 (0.88-1.38) |             |
| 9           | 9           | 50976                 | 15501 (30.4)         | 1.03 (1.01-1.06)            | 1.03 (1.01-1.05) |             |
| 9           | 10          | 28253                 | 8303 (29.4)          | 1.00 (Reference)            | 1.00 (Reference) | 0.009       |
| 10          | <10         | 26                    | 13 (50.0)            | 1.68 (1.14-2.47)            | 1.53 (1.08-2.17) |             |
| 10          | 10          | 3057                  | 911 (29.8)           | 1.00 (Reference)            | 1.00 (Reference) | 0.016†      |

\*Adjusted for child's sex (male vs female), child's age at EDI completion (years), socioeconomic status (1st quintile, 2nd quintile, 3rd quintile, 4th quintile vs 5th quintile) child's first language (others vs English), birth order (2, 3, +4 vs 1), birth weight-for gestational age (large, small vs appropriate), gestational age (weeks).

† P value for difference in rates.

1  
2  
3  
4  
5  
6  
7  
8  
9  
10  
11  
12  
13  
14  
15  
16  
17  
18  
19  
20  
21  
22  
23  
24  
25  
26  
27  
28  
29  
30  
31  
32  
33  
34  
35  
36  
37  
38  
39  
40  
41  
42  
43  
44  
45  
46  
47  
48  
49  
50  
51  
52  
53  
54  
55  
56  
57  
58  
59  
60

**Figure 1 Legend:** Rates of vulnerability within the five Early Development Instrument domains by Apgar score at 5-minute, British Columbia, Canada

For peer review only



**Figure 1:** Rates of vulnerability within the five Early Development Instrument domains by Apgar score at 5-minute, British Columbia, Canada



**Supplementary Table 1. Five domains of the Early Development Instrument**

| EDI domains                                | Characteristics addressed                                                                                                                                                                  |
|--------------------------------------------|--------------------------------------------------------------------------------------------------------------------------------------------------------------------------------------------|
| Physical health and well-being             | Children's fine and gross motor skills, energy levels, fatigue and clumsiness                                                                                                              |
| Social competence                          | Self-confidence, tolerance, ability to get along with other children, to accept responsibility for their own actions, to work independently                                                |
| Emotional maturity                         | Children's general emotional health and maturity. It also identifies minor problems with aggression, restlessness, distractibility or inattentiveness as well as excessive regular sadness |
| Language and cognitive skills              | Mastery of the basics of reading and writing, interest in books, and numerical skills                                                                                                      |
| Communication skills and general knowledge | Children's general knowledge, their ability to articulate clearly and their ability to understand and communicate in English                                                               |

**Supplementary Table 2. Apgar score at one and five minutes and rate ratios for vulnerability in each domain of the EDI, among singleton term live births in British Columbia, Canada**

| Apgar Score        | Physical health domain |        |                  | Social domain    |        |                  | Emotional domain |        |                  |
|--------------------|------------------------|--------|------------------|------------------|--------|------------------|------------------|--------|------------------|
|                    | No. with outcome       | %      | Adjusted*        | No. with outcome | %      | Adjusted*        | No. with outcome | %      | Adjusted*        |
| <b>1-Min Apgar</b> |                        |        |                  |                  |        |                  |                  |        |                  |
| 0                  | <5                     | <20.83 | 0.90 (0.37–2.19) | <5               | <20.83 | 1.01 (0.40–2.51) | <5               | <20.83 | 0.71 (0.25–1.96) |
| 1                  | 88                     | 18.76  | 1.24 (1.02–1.52) | 82               | 17.48  | 1.30 (1.05–1.61) | 83               | 17.7   | 1.25 (1.01–1.54) |
| 2                  | 179                    | 16.89  | 1.09 (0.93–1.27) | 142              | 13.40  | 0.97 (0.82–1.16) | 147              | 13.87  | 0.96 (0.81–1.14) |
| 3                  | 283                    | 16.08  | 1.06 (0.93–1.21) | 246              | 13.98  | 1.03 (0.89–1.19) | 273              | 15.51  | 1.09 (0.95–1.25) |
| 4                  | 410                    | 15.88  | 1.06 (0.94–1.19) | 349              | 13.52  | 1.02 (0.89–1.16) | 370              | 14.33  | 1.03 (0.91–1.18) |
| 5                  | 644                    | 15.83  | 1.04 (0.93–1.16) | 569              | 13.98  | 1.06 (0.94–1.19) | 563              | 13.84  | 1.01 (0.90–1.13) |
| 6                  | 1076                   | 15.43  | 1.02 (0.93–1.13) | 925              | 13.26  | 1.02 (0.92–1.14) | 932              | 13.36  | 1.00 (0.89–1.11) |
| 7                  | 1889                   | 15.72  | 1.03 (0.94–1.13) | 1555             | 12.94  | 1.00 (0.90–1.11) | 1500             | 12.48  | 0.94 (0.85–1.04) |
| 8                  | 5876                   | 15.19  | 1.01 (0.93–1.10) | 4993             | 12.91  | 1.01 (0.92–1.11) | 4836             | 12.51  | 0.96 (0.87–1.05) |
| 9                  | 11839                  | 14.92  | 0.99 (0.91–1.08) | 9858             | 12.42  | 0.97 (0.89–1.07) | 9608             | 12.11  | 0.94 (0.86–1.03) |
| 10                 | 472                    | 15.31  | 1.00 (Reference) | 393              | 12.75  | 1.00 (Reference) | 399              | 12.94  | 1.00 (Reference) |
| <b>5-Min Apgar</b> |                        |        |                  |                  |        |                  |                  |        |                  |
| 0                  | <5                     | <25.00 | 0.66 (0.17–2.60) | <5               | <25.00 | 1.13 (0.44–2.9)  | <5               | <25.00 | 1.13 (0.44–2.88) |
| 1                  | 6                      | 37.5   | 2.42 (1.28–4.59) | <5               | <31.25 | 1.42 (0.58–3.52) | <5               | <31.25 | 1.92 (0.89–4.11) |
| 2                  | 9                      | 32.14  | 2.22 (1.23–4.01) | 7                | 25.00  | 1.87 (0.99–3.53) | 6                | 21.43  | 1.60 (0.83–3.07) |
| 3                  | 21                     | 25.30  | 1.75 (1.22–2.51) | 15               | 18.07  | 1.37 (0.87–2.17) | 12               | 14.46  | 1.08 (0.65–1.78) |
| 4                  | 25                     | 23.58  | 1.56 (1.12–2.18) | 18               | 16.98  | 1.26 (0.84–1.90) | 18               | 16.98  | 1.19 (0.77–1.82) |
| 5                  | 46                     | 15.86  | 1.06 (0.81–1.37) | 34               | 11.72  | 0.86 (0.63–1.19) | 33               | 11.38  | 0.84 (0.61–1.17) |
| 6                  | 164                    | 17.60  | 1.13 (0.99–1.30) | 159              | 17.06  | 1.26 (1.10–1.44) | 167              | 17.92  | 1.33 (1.16–1.52) |
| 7                  | 377                    | 15.87  | 1.08 (0.98–1.19) | 319              | 13.43  | 1.05 (0.95–1.16) | 336              | 14.15  | 1.11 (1.00–1.23) |
| 8                  | 1237                   | 16.14  | 1.08 (1.02–1.14) | 1014             | 13.23  | 1.04 (0.97–1.10) | 1021             | 13.32  | 1.06 (1.00–1.13) |
| 9                  | 15272                  | 15.09  | 1.03 (1.00–1.06) | 12904            | 12.75  | 1.02 (0.99–1.06) | 12641            | 12.49  | 1.04 (1.01–1.07) |
| 10                 | 5601                   | 14.99  | 1.00 (Reference) | 4640             | 12.42  | 1.00 (Reference) | 4473             | 11.97  | 1.00 (Reference) |

**Supplementary Table 2 (cont.). Apgar score at one and five minutes and rate ratios for each domain of the EDI, among singleton term live births in British Columbia, Canada**

| Apgar Score        | Language domain  |        |                  | Communication domain |              |                  |
|--------------------|------------------|--------|------------------|----------------------|--------------|------------------|
|                    | No. with outcome | %      | Adjusted*        | No. with outcome     | %            | Adjusted*        |
| <b>1-Min Apgar</b> |                  |        |                  | <b>18335</b>         | <b>12.18</b> |                  |
| 0                  | 5                | 20.83  | 1.85 (0.81–4.25) | <5                   | <20.83       | 1.27 (0.50–3.22) |
| 1                  | 60               | 12.79  | 1.42 (1.10–1.82) | 54                   | 11.51        | 1.07 (0.83–1.39) |
| 2                  | 106              | 10.00  | 1.05 (0.86–1.29) | 131                  | 12.36        | 1.12 (0.93–1.35) |
| 3                  | 174              | 9.89   | 1.07 (0.90–1.27) | 203                  | 11.53        | 1.05 (0.90–1.23) |
| 4                  | 269              | 10.42  | 1.14 (0.98–1.32) | 291                  | 11.27        | 1.04 (0.90–1.19) |
| 5                  | 435              | 10.69  | 1.14 (1.00–1.31) | 486                  | 11.94        | 1.10 (0.97–1.24) |
| 6                  | 733              | 10.51  | 1.13 (1.00–1.28) | 803                  | 11.51        | 1.07 (0.96–1.20) |
| 7                  | 1255             | 10.44  | 1.10 (0.98–1.23) | 1440                 | 11.98        | 1.08 (0.97–1.20) |
| 8                  | 3830             | 9.90   | 1.04 (0.93–1.16) | 4711                 | 12.18        | 1.04 (0.95–1.15) |
| 9                  | 7621             | 9.60   | 0.99 (0.89–1.10) | 9779                 | 12.32        | 1.00 (0.91–1.10) |
| 10                 | 305              | 9.89   | 1.00 (Reference) | 372                  | 12.07        | 1.00 (Reference) |
| <b>5-Min Apgar</b> |                  |        |                  |                      |              |                  |
| 0                  | 6                | 30.00  | 3.13 (1.52–6.44) | <5                   | <25.00       | 1.27 (0.43–3.70) |
| 1                  | <5               | <31.25 | 1.23 (0.38–3.92) | <5                   | <31.25       | 1.75 (0.74–4.13) |
| 2                  | 5                | 17.86  | 1.95 (0.86–4.43) | 7                    | 25.00        | 2.19 (1.09–4.41) |
| 3                  | 13               | 15.66  | 1.79 (1.11–2.91) | 14                   | 16.87        | 1.63 (1.00–2.68) |
| 4                  | 14               | 13.21  | 1.44 (0.89–2.34) | 15                   | 14.15        | 1.33 (0.84–2.12) |
| 5                  | 29               | 10.00  | 1.11 (0.78–1.57) | 29                   | 10.00        | 0.94 (0.67–1.33) |
| 6                  | 96               | 10.30  | 1.09 (0.90–1.31) | 107                  | 11.48        | 1.03 (0.87–1.23) |
| 7                  | 243              | 10.23  | 1.14 (1.01–1.29) | 255                  | 10.74        | 1.04 (0.92–1.16) |
| 8                  | 809              | 10.55  | 1.13 (1.06–1.22) | 895                  | 11.67        | 1.07 (1.00–1.14) |
| 9                  | 9939             | 9.82   | 1.04 (1.00–1.07) | 12595                | 12.45        | 1.03 (1.00–1.06) |
| 10                 | 3637             | 9.73   | 1.00 (Reference) | 4351                 | 11.64        | 1.00 (Reference) |

\*Adjusted for child's sex (male vs female), child's age at EDI completion (years), socioeconomic status (1st quintile, 2nd quintile, 3rd quintile, 4th quintile vs 5th quintile) child's first language (others vs English), birth order (2, 3, +4 vs 1), birth weight-for-gestational age (large, small vs appropriate), gestational age (weeks).

## STROBE Statement—checklist of items that should be included in reports of observational studies

|                              | Item No | Recommendation                                                                                                                                                                                                                                                                                                                                                                                                                                                                                                                                                                                                                                                                                                       |
|------------------------------|---------|----------------------------------------------------------------------------------------------------------------------------------------------------------------------------------------------------------------------------------------------------------------------------------------------------------------------------------------------------------------------------------------------------------------------------------------------------------------------------------------------------------------------------------------------------------------------------------------------------------------------------------------------------------------------------------------------------------------------|
| <b>Title and abstract</b>    | 1       | (a) Indicate the study's design with a commonly used term in the title or the abstract (Page 1 and 2)<br>(b) Provide in the abstract an informative and balanced summary of what was done and what was found (Page 2)                                                                                                                                                                                                                                                                                                                                                                                                                                                                                                |
| <b>Introduction</b>          |         |                                                                                                                                                                                                                                                                                                                                                                                                                                                                                                                                                                                                                                                                                                                      |
| Background/rationale         | 2       | Explain the scientific background and rationale for the investigation being reported (Page 3, paragraph 1 and 2)                                                                                                                                                                                                                                                                                                                                                                                                                                                                                                                                                                                                     |
| Objectives                   | 3       | State specific objectives, including any prespecified hypotheses (Page 4, paragraph 2)                                                                                                                                                                                                                                                                                                                                                                                                                                                                                                                                                                                                                               |
| <b>Methods</b>               |         |                                                                                                                                                                                                                                                                                                                                                                                                                                                                                                                                                                                                                                                                                                                      |
| Study design                 | 4       | Present key elements of study design early in the paper (Page 4, para 1)                                                                                                                                                                                                                                                                                                                                                                                                                                                                                                                                                                                                                                             |
| Setting                      | 5       | Describe the setting, locations, and relevant dates, including periods of recruitment, exposure, follow-up, and data collection (Page 6 to 9)                                                                                                                                                                                                                                                                                                                                                                                                                                                                                                                                                                        |
| Participants                 | 6       | (a) <i>Cohort study</i> —Give the eligibility criteria, and the sources and methods of selection of participants. Describe methods of follow-up (Page 4 to 7)<br><i>Case-control study</i> —Give the eligibility criteria, and the sources and methods of case ascertainment and control selection. Give the rationale for the choice of cases and controls<br><i>Cross-sectional study</i> —Give the eligibility criteria, and the sources and methods of selection of participants<br>(b) <i>Cohort study</i> —For matched studies, give matching criteria and number of exposed and unexposed (n/a)<br><i>Case-control study</i> —For matched studies, give matching criteria and the number of controls per case |
| Variables                    | 7       | Clearly define all outcomes, exposures, predictors, potential confounders, and effect modifiers. Give diagnostic criteria, if applicable (Page 4 to 7)                                                                                                                                                                                                                                                                                                                                                                                                                                                                                                                                                               |
| Data sources/<br>measurement | 8*      | For each variable of interest, give sources of data and details of methods of assessment (measurement). Describe comparability of assessment methods if there is more than one group (Page 4 to 7)                                                                                                                                                                                                                                                                                                                                                                                                                                                                                                                   |
| Bias                         | 9       | Describe any efforts to address potential sources of bias (n/a)                                                                                                                                                                                                                                                                                                                                                                                                                                                                                                                                                                                                                                                      |
| Study size                   | 10      | Explain how the study size was arrived at (n/a)                                                                                                                                                                                                                                                                                                                                                                                                                                                                                                                                                                                                                                                                      |
| Quantitative variables       | 11      | Explain how quantitative variables were handled in the analyses. If applicable, describe which groupings were chosen and why (Page 6 to 7)                                                                                                                                                                                                                                                                                                                                                                                                                                                                                                                                                                           |
| Statistical methods          | 12      | (a) Describe all statistical methods, including those used to control for confounding (Page 6 to 7)<br>(b) Describe any methods used to examine subgroups and interactions (n/a)<br>(c) Explain how missing data were addressed (n/a)<br>(d) <i>Cohort study</i> —If applicable, explain how loss to follow-up was addressed<br><i>Case-control study</i> —If applicable, explain how matching of cases and controls was addressed                                                                                                                                                                                                                                                                                   |

1  
2  
3  
4  
5  
6  
7  
8  
9  
10  
11  
12  
13  
14  
15  
16  
17  
18  
19  
20  
21  
22  
23  
24  
25  
26  
27  
28  
29  
30  
31  
32  
33  
34  
35  
36  
37  
38  
39  
40  
41  
42  
43  
44  
45  
46  
47  
48  
49  
50  
51  
52  
53  
54  
55  
56  
57  
58  
59  
60

*Cross-sectional study*—If applicable, describe analytical methods taking account of sampling strategy

---

(e) Describe any sensitivity analyses

Continued on next page

For peer review only

## Results

|                  |     |                                                                                                                                                                                                                                                                                                                                                                                                                                             |
|------------------|-----|---------------------------------------------------------------------------------------------------------------------------------------------------------------------------------------------------------------------------------------------------------------------------------------------------------------------------------------------------------------------------------------------------------------------------------------------|
| Participants     | 13* | (a) Report numbers of individuals at each stage of study—eg numbers potentially eligible, examined for eligibility, confirmed eligible, included in the study, completing follow-up, and analysed ( <a href="#">Page 7, para 1</a> )<br>(b) Give reasons for non-participation at each stage ( <a href="#">n/a</a> )<br>(c) Consider use of a flow diagram                                                                                  |
| Descriptive data | 14* | (a) Give characteristics of study participants (eg demographic, clinical, social) and information on exposures and potential confounders ( <a href="#">Page 7 and 8</a> )<br>(b) Indicate number of participants with missing data for each variable of interest<br>(c) <i>Cohort study</i> —Summarise follow-up time (eg, average and total amount)                                                                                        |
| Outcome data     | 15* | <i>Cohort study</i> —Report numbers of outcome events or summary measures over time ( <a href="#">Page 7 and 8</a> )<br><i>Case-control study</i> —Report numbers in each exposure category, or summary measures of exposure<br><i>Cross-sectional study</i> —Report numbers of outcome events or summary measures                                                                                                                          |
| Main results     | 16  | (a) Give unadjusted estimates and, if applicable, confounder-adjusted estimates and their precision (eg, 95% confidence interval). Make clear which confounders were adjusted for and why they were included ( <a href="#">Page 8 -9</a> )<br>(b) Report category boundaries when continuous variables were categorized<br>(c) If relevant, consider translating estimates of relative risk into absolute risk for a meaningful time period |
| Other analyses   | 17  | Report other analyses done—eg analyses of subgroups and interactions, and sensitivity analyses                                                                                                                                                                                                                                                                                                                                              |

## Discussion

|                  |    |                                                                                                                                                                                                              |
|------------------|----|--------------------------------------------------------------------------------------------------------------------------------------------------------------------------------------------------------------|
| Key results      | 18 | Summarise key results with reference to study objectives ( <a href="#">Page 9, last para</a> )                                                                                                               |
| Limitations      | 19 | Discuss limitations of the study, taking into account sources of potential bias or imprecision. Discuss both direction and magnitude of any potential bias ( <a href="#">Page 11</a> )                       |
| Interpretation   | 20 | Give a cautious overall interpretation of results considering objectives, limitations, multiplicity of analyses, results from similar studies, and other relevant evidence ( <a href="#">Page 10 to 11</a> ) |
| Generalisability | 21 | Discuss the generalisability (external validity) of the study results                                                                                                                                        |

## Other information

|         |    |                                                                                                                                                                                          |
|---------|----|------------------------------------------------------------------------------------------------------------------------------------------------------------------------------------------|
| Funding | 22 | Give the source of funding and the role of the funders for the present study and, if applicable, for the original study on which the present article is based ( <a href="#">Page 1</a> ) |
|---------|----|------------------------------------------------------------------------------------------------------------------------------------------------------------------------------------------|

\*Give information separately for cases and controls in case-control studies and, if applicable, for exposed and unexposed groups in cohort and cross-sectional studies.

**Note:** An Explanation and Elaboration article discusses each checklist item and gives methodological background and published examples of transparent reporting. The STROBE checklist is best used in conjunction with this article (freely available on the Web sites of PLoS Medicine at <http://www.plosmedicine.org/>, Annals of Internal Medicine at <http://www.annals.org/>, and Epidemiology at <http://www.epidem.com/>). Information on the STROBE Initiative is available at [www.strobe-statement.org](http://www.strobe-statement.org).

# BMJ Open

## 1-minute and 5-minute Apgar scores and child developmental health at 5 years of age, a population-based cohort study in British Columbia, Canada

|                                 |                                                                                                                                                                                                                                                                                                                                                                           |
|---------------------------------|---------------------------------------------------------------------------------------------------------------------------------------------------------------------------------------------------------------------------------------------------------------------------------------------------------------------------------------------------------------------------|
| Journal:                        | <i>BMJ Open</i>                                                                                                                                                                                                                                                                                                                                                           |
| Manuscript ID                   | bmjopen-2018-027655.R2                                                                                                                                                                                                                                                                                                                                                    |
| Article Type:                   | Research                                                                                                                                                                                                                                                                                                                                                                  |
| Date Submitted by the Author:   | 27-Feb-2019                                                                                                                                                                                                                                                                                                                                                               |
| Complete List of Authors:       | Razaz, Neda; Karolinska Institutet, Cnattingius, Sven; Karolinska Institute, Department of Medicine, Solna Persson, Martina; Karolinska Institute Tedroff, Kristina; Karolinska Institutet, Women's and Children's Health Lisonkova, Sarka; University British Columbia, Obstetrics and Gynaecology Joseph, K; University of British Columbia, Obstetrics and Gynaecology |
| <b>Primary Subject Heading</b>: | Paediatrics                                                                                                                                                                                                                                                                                                                                                               |
| Secondary Subject Heading:      | Epidemiology                                                                                                                                                                                                                                                                                                                                                              |
| Keywords:                       | NEONATOLOGY, EPIDEMIOLOGY, Fetal medicine < OBSTETRICS, PAEDIATRICS, Developmental neurology & neurodisability < PAEDIATRICS                                                                                                                                                                                                                                              |
|                                 |                                                                                                                                                                                                                                                                                                                                                                           |

SCHOLARONE™  
Manuscripts



1  
2  
3  
4  
5  
6 **1-minute and 5-minute Apgar scores and child developmental health at 5 years of age, a**  
7 **population-based cohort study in British Columbia, Canada**

8  
9 Neda Razaz, MPH, PhD;<sup>1</sup> Sven Cnattingius, MD, PhD;<sup>1</sup> Martina Persson, MD, PhD;<sup>1</sup> Kristina  
10 Tedroff, MD, PhD;<sup>2</sup> Sarka Lisonkova, MD, PhD;<sup>3</sup> K.S. Joseph, MD, PhD<sup>3</sup>

11  
12  
13 **Affiliation:** <sup>1</sup> Department of Medicine, Solna, Clinical Epidemiology Unit, Karolinska Institutet,  
14 Stockholm, Sweden. <sup>2</sup> Department of Women's and Children's Health, Neuropediatric unit,  
15 Karolinska Institutet, Stockholm, Sweden. <sup>3</sup> Department of Obstetrics & Gynaecology, School of  
16 Population and Public Health, University of British Columbia and the Children's and Women's  
17 Hospital of British Columbia, Vancouver, Canada

18  
19  
20 **Address correspondence to:** Dr. Neda Razaz, Clinical Epidemiology Unit, Department of  
21 Medicine Solna, Karolinska University Hospital, Karolinska Institutet, SE-171 76 Stockholm,  
22 Sweden. [[neda.razaz@gmail.com](mailto:neda.razaz@gmail.com)] +46 851776181

23  
24 **Funding statement:** No funding.

25  
26 **Role of the funder:** None.

27  
28  
29 **Financial Disclosure:** NR is supported by a postdoctoral fellowship award from the Canadian  
30 Institutes of Health Research (CIHR). KSJ is supported by the BC Children's Hospital Research  
31 Institute.

32  
33  
34 **Conflict of interest:** The authors have no potential conflicts of interest to disclose.

35  
36 **Short title:** Apgar scores and child developmental health

## ABSTRACT

**Objectives:** We investigated the associations between Apgar scores at 1 and 5 minutes, across the entire range of score values, and child developmental health at 5 years of age.

**Setting:** British Columbia, Canada.

**Participants:** All singleton term infants without major congenital anomalies born between 1993 and 2009, who had a developmental assessment in kindergarten between 1999 and 2014.

**Main outcomes and measures:** Developmental vulnerability on one or more domains of the Early Development Instrument and special needs requirements. Adjusted rate ratios (aRRs) and 95% confidence intervals (CIs) were estimated using log-linear regression.

**Results:** Of the 150,081 children in the study, 45,334 (30.2%) were developmentally vulnerable and 3,644 (2.5%) had special needs. There was an increasing trend in developmental vulnerability and special needs with decreasing 1-minute and 5-minute Apgar scores. Compared with children with an Apgar score of 10 at 5 minutes, the aRR for developmental vulnerability increased steadily with decreasing Apgar score from 1.02 (95%CI 1.00-1.04) for an Apgar score of 9 to 1.57 (95%CI 1.03-2.39) for an Apgar score of two. Among children with 1-minute Apgar scores in the 7-10 range, changes in Apgar scores between 1- and 5-minute were associated with significant differences in developmental vulnerability. Compared with children who had an Apgar score of 9 at 1-minute and 10 at 5-minute, children with an Apgar score of 9 at both 1- and 5-minute had higher rates of developmental vulnerability (aRR 1.03, 95%CI 1.01-1.05). Compared with infants with an Apgar of 10 at both 1 and 5 minutes, infants with a 1-minute score of 10 and a 5-minute score of <10 had higher rates of developmental vulnerability (aRR 1.53, 95%CI 1.08-2.17).

**Conclusion:** Risks of adverse developmental health and having special needs at 5 years of age are inversely associated with 1-minute and 5-minute Apgar scores across their entire range.

1  
2  
3 **Article Summary:**  
4

5 **Strengths and limitations of this study:**  
6

- 7
- 8 • Ability to access comprehensive health and education-related databases at the population  
9 level.  
10
  - 11 • Using a teacher reported instrument, no reliance was placed on parent or self-report of  
12 developmental health.  
13
  - 14 • There may be some individual differences in teachers' ability to evaluate developmental  
15 health on the Early Development Instrument.  
16
  - 17 • Study was restricted to the comparatively healthy subset of all term live births, as children  
18 with severe disabilities may not have enrolled in kindergarten.  
19  
20  
21  
22  
23  
24  
25  
26  
27  
28  
29  
30  
31  
32  
33  
34  
35  
36  
37  
38  
39  
40  
41  
42  
43  
44  
45  
46  
47  
48  
49  
50  
51  
52  
53  
54  
55  
56  
57  
58  
59  
60

## INTRODUCTION

In 1953, Virginia Apgar proposed a scoring system that enabled a rapid assessment of the clinical status of the newborn infant and identified infants requiring resuscitation on the basis of heart rate, respiration, color, muscle tone and reflex irritability.<sup>1</sup> Initially, the Apgar score at 1 minute was used to assess the need for immediate resuscitation. Subsequently, the Apgar score at 5 minutes was shown to be a better predictor of neonatal survival than the Apgar score at 1 minute. Although the value of a low Apgar score for accurately predicting adverse neurologic outcomes at the individual level has been questioned,<sup>2,3</sup> low Apgar scores are well correlated with both short-term<sup>4</sup> and long-term outcomes, in both preterm and term infants.<sup>5-11</sup>

Only the lowest and more compromised Apgar scores have been conventionally regarded as predictive of maladaptive development and morbidity. Nevertheless, a few population-based studies have shown that risks of cerebral palsy, epilepsy, early developmental health status and need for special education are inversely associated with 5-minute Apgar scores in a dose-dependent manner across the entire range of scores.<sup>12-14</sup> Even children with an Apgar score of 9 at 5 or 10 minutes have an increased risk of adverse neurological outcomes compared with children with 5- or 10-minute Apgar scores of 10.<sup>12,13</sup> Although approximately 65% to 85% of newborns receive a 1-minute or a 5-minute Apgar score in the 7 to 9 range,<sup>13</sup> there is a dearth of information on how this impacts a child's developmental health.

Changes in Apgar score values between 1 and 5 minutes, and between 5 and 10 minutes are known to influence risks of cerebral palsy and epilepsy.<sup>12,15,16</sup> Our recent population-based study demonstrated elevated risks of cerebral palsy and epilepsy among children with a 5-minute Apgar score of 7 or 8, even if their 10-minute Apgar score was 9 or 10.<sup>12</sup> Although it is recognized that

1  
2 changes in Apgar scores between 1 and 5 minutes are a useful measure of the response to  
3  
4 resuscitation, the long-term significance of changes in such Apgar scores within the “normal”  
5  
6 range (i.e., 7-10) is not clear.  
7  
8  
9

10  
11 In this population-based study, we investigated the associations between Apgar scores at 1 and 5  
12  
13 minutes across the entire range of score values, and developmental health at 5 years of age. We  
14  
15 also analyzed the effect of a change in Apgar scores from 1 to 5 minutes, including changes within  
16  
17 the normal range of Apgar scores. Specifically, we were interested in developmental health among  
18  
19 children with 1-minute Apgar scores in the 7-9 range who received a score less than 10 at 5  
20  
21 minutes.  
22  
23  
24  
25  
26  
27

## 28 **METHODS**

29  
30 The study was based on all singleton term infants without major congenital anomalies born  
31  
32 between 1993 and 2009, who had a developmental assessment in kindergarten between 1999 and  
33  
34 2014. Information on the study population was obtained from several population-based linked  
35  
36 health and demographic databases in British Columbia. The anonymized linked data used in this  
37  
38 study included information from the Discharge Abstract Database<sup>17</sup> that comprised hospital  
39  
40 admission and discharge records; the Vital Statistics Birth and Clinical Births<sup>18</sup> databases, which  
41  
42 contained information on all births in the province, along with delivery and neonatal health status,  
43  
44 including diagnoses based on International Classification of Diseases (ICD 9 or ICD-10CA) codes;  
45  
46 Census GeoData, which provided socioeconomic status (SES) data expressed as average  
47  
48 neighbourhood income quintiles (based on Census information from Statistics Canada and  
49  
50 quantified using postal codes);<sup>19</sup> the Consolidation File,<sup>20</sup> which provided demographic  
51  
52 information on study subjects and confirmed residency in the province; and the Early Development  
53  
54  
55  
56  
57  
58  
59  
60

1  
2 Instrument (EDI)<sup>21</sup> data, which provided information on early childhood developmental health, and  
3  
4 were accessed through linkage with the Human Early Learning Partnership.<sup>22</sup> The EDI has been  
5  
6 routinely administered province-wide in British Columbia every one to three years since the  
7  
8 1999/2000 school year, achieving at least 85% participation of kindergarten children from each  
9  
10 school district. Teachers completed the EDI for each child in their kindergarten class (age range 5-  
11  
12 7 years) in February. The EDI is designed to tap five core areas of early childhood development:<sup>21-</sup>  
13  
14 <sup>23</sup> physical health and well-being; social competence; emotional maturity; language and cognitive  
15  
16 development; and communication skills and general knowledge (Supplementary Table 1).<sup>21</sup> It  
17  
18 consists of 104 binary and Likert-scale items, from which scores between 0 and 10 are calculated  
19  
20 for each domain. The EDI also records demographic information on each child and whether the  
21  
22 child has identified special needs.  
23  
24  
25  
26  
27  
28  
29

30 The study population included all singleton term ( $\geq 37$  weeks' gestation) infants born between April  
31  
32 1, 1993 and December 31, 2009, who had documented 1-minute and 5-minute Apgar scores as well  
33  
34 as a completed EDI assessment in kindergarten. Inclusion of infants with these birth dates meant  
35  
36 that children were 5 to 7 years of age between 1999 and 2014 and part of the EDI assessment. The  
37  
38 study population was restricted to infants without major congenital anomalies, identified using  
39  
40 diagnosis codes from linked hospital records in the year after birth.  
41  
42  
43  
44  
45

46 Apgar scores at 1 and 5 minutes were considered as the main exposures and examined both as  
47  
48 discrete values from 0 to 10 and also as grouped categories (Apgar values of 0-3, 4-6, 7, 8, 9, and  
49  
50 10). Children with an Apgar score of 0 at 1 or 5 minutes who did not have a diagnostic code for  
51  
52 birth asphyxia [ICD-9: 768.5, 768.6 and 768.9; ICD-10: P21], or an intervention code for either  
53  
54 resuscitation or ventilation (Canadian Classification of health interventions: 1.GZ.30, 1.GZ31,  
55  
56  
57  
58  
59

1  
2  
3 1.HZ.30, 1361, 1362, 1363, 1373, 1379, 1004) were excluded from the study (n=470), as  
4  
5 information on these cases likely resulted from transcription errors.  
6  
7  
8

9  
10 Developmental health assessment included whether a child had special needs or was  
11  
12 developmentally vulnerable as measured by the EDI. Children were categorized as being  
13  
14 developmentally vulnerable if their scores on the EDI fell below the 10<sup>th</sup> percentile value<sup>24</sup> in any  
15  
16 of the five domains, based on the national EDI cut-off scores.<sup>25</sup> The 10<sup>th</sup> percentile cut-off has been  
17  
18 recommended because it is higher and hence more sensitive than clinical cut-off points of 3% or  
19  
20 5% for diagnosing developmental delay.<sup>21</sup> Developmentally vulnerable children may not manifest  
21  
22 developmental delays but may be at risk of experiencing challenges in school and society without  
23  
24 additional support and care.<sup>26</sup> Children with special needs were defined as requiring special  
25  
26 assistance because of chronic medical, physical, or intellectually disabling conditions.  
27  
28  
29  
30  
31

32  
33 Other independent variables examined included infant sex (male vs female), birth weight-for-  
34  
35 gestational age, age of the child in years at the time of EDI assessment, gestational age at birth in  
36  
37 completed weeks (37, 38, 39, 40, 41, and  $\geq 42$ ), birth order (1, 2, 3, and +4), marital status (married  
38  
39 vs not married) and socioeconomic status (quintiles). Birth weight-for-gestational age was  
40  
41 categorized as: small (<10<sup>th</sup> percentile), appropriate (10<sup>th</sup>-90<sup>th</sup> percentile) and large (>90<sup>th</sup>  
42  
43 percentile) for gestational age.<sup>27</sup> Each child's family income was derived from the median  
44  
45 household income in the child's residential area (based on postal code) obtained from the 2006  
46  
47 Canadian Census data.<sup>28-30</sup>  
48  
49  
50  
51  
52

53  
54 The frequency of each 5-minute Apgar score value was calculated within categories of maternal  
55  
56 and infant characteristics. Multivariable log-linear regression models with robust variance  
57  
58  
59  
60

1  
2  
3 estimates<sup>31</sup> was used to examine the association between Apgar scores at 1 and 5 minutes and  
4  
5 developmental vulnerability and special needs. Results were expressed as crude and adjusted rate  
6  
7 ratios (aRR) with 95% confidence intervals (CI). Other variables included in the final models were  
8  
9 based on the literature<sup>24 32</sup> or statistical significance (P value <0.10). The full model included  
10  
11 child's sex, child's age at EDI completion, socioeconomic status, child's first language, birth  
12  
13 weight-for-gestational age, birth order, and gestational age. Interactions between Apgar scores and  
14  
15 other determinants were examined and stratified analyses were carried out when a significant  
16  
17 interaction was present. The University of British Columbia's Clinical Research Ethics Board  
18  
19 approved the study.  
20  
21  
22  
23  
24  
25

### 26 **Patient and public involvement**

27  
28 No patients were involved in setting the research question or the outcome measures, nor were they  
29  
30 involved in developing plans for or implementation of the study. No patients were asked to advise  
31  
32 on interpretation of the findings.  
33  
34  
35  
36

### 37 **RESULTS**

38  
39 There were 150,081 children (mean age = 5.7 years) with a gestational age at birth of  $\geq 37$  weeks,  
40  
41 without major malformations and complete Apgar and EDI data included in the study. Information  
42  
43 on special needs was available in 148,699 (99.1%) children. Five-minute Apgar scores showed a  
44  
45 U-shaped association with gestational age at birth, with low scores more frequent at 37 weeks and  
46  
47  $\geq 42$  weeks (Table 1). Low 5-minute Apgar scores were comparable for most characteristics but  
48  
49 more frequent among males, small-for-gestational age live births, children of mothers who were  
50  
51 nulliparous, not married and those with a low socioeconomic status.  
52  
53  
54  
55  
56  
57  
58  
59  
60



1  
2 Overall, the prevalence of vulnerability in one or more domains of the EDI was 30.2%, with  
3  
4 physical and social domains having the highest rates of vulnerability at 15.2% and 12.7%,  
5  
6 respectively (Figure 1). There was an increasing trend in the rate of developmental vulnerability  
7  
8 with decreasing 1-minute and 5-minute Apgar scores (P for trend <0.001; Table 2). However, this  
9  
10 association was much more pronounced for the 5-minute Apgar score. Compared with children  
11  
12 with an Apgar score of 10 at 5 minutes, children with a 5-minute Apgar score of 2 had a 57%  
13  
14 higher rate of developmental vulnerability (aRR 1.57, 95% CI 1.03-2.39). Similarly, children with  
15  
16 a 5-minute Apgar score of 7, 8 or 9 had significantly higher rates of developmental vulnerability  
17  
18 compared with children with a 5-minute Apgar score of 10 (aRR 1.08, 1.06 and 1.02 for Apgar 7, 8  
19  
20 and 9, respectively; Table 2). The association between 5-minute Apgar scores and developmental  
21  
22 vulnerability was mainly due to the higher rates of vulnerability in the language and emotional  
23  
24 domains of the EDI (Supplementary Table 2).  
25  
26  
27  
28  
29  
30  
31

32 In total, 3,644 (2.5%) children had special needs (Table 3). The proportion of children with special  
33  
34 needs increased linearly with decreasing 1-minute and 5-minute Apgar scores (P for trend <0.001).  
35  
36 Compared with children who had a 1-minute Apgar score of 10, those with an Apgar score of 2 at 1  
37  
38 minute had significantly higher adjusted rates of having special needs (aRR 1.72, 95% CI 1.19-  
39  
40 2.48), while those with an Apgar score of 5 at 1 minute had 1.39 times the rate of having special  
41  
42 needs (95% CI 1.05-1.85). Children with 5-minute Apgar scores in the 1 to 8 range had higher  
43  
44 adjusted rates for having special needs, which consistently increased with decreasing 5-minute  
45  
46 Apgar score values: from 1.20 in children with an Apgar score of 8 at 5-minute to 5.13 among  
47  
48 those with an Apgar score of 1 at 5-minute. The adjusted rate ratios for having special needs among  
49  
50 children with 1- and 5-minute Apgar scores in the 0-3 range had wide 95% confidence intervals  
51  
52 because of small numbers of children in these categories.  
53  
54  
55  
56  
57  
58  
59  
60

1  
2  
3  
4  
5 Table 4 shows rates of developmental vulnerability in relation to changes in Apgar score from 1 to  
6  
7 5 minutes, among children whose 1-minute Apgar score was in the normal range (7 to 10). Among  
8  
9 children with a 1-minute Apgar score of 7, the rate of developmental vulnerability decreased in a  
10  
11 dose-response manner with greater improvement in the Apgar score from 1 to 5 minutes (P value  
12  
13 for dose response = 0.02). Larger reductions in developmental vulnerability with greater  
14  
15 improvements in 1- to 5-minute Apgar scores were also evident among children with a 1-minute  
16  
17 Apgar score of 9 (P value for trend 0.009) but not among children with a 1-minute Apgar score of 8  
18  
19 (P value for trend 0.36). Children with an Apgar score of 9 at 1 minute and 9 at 5 minutes had  
20  
21 higher rates of developmental vulnerability compared with those who had Apgar scores of 9 at 1  
22  
23 minute and 10 at 5 minutes (aRR 1.03, 95% CI 1.01-1.05). Furthermore, compared with children  
24  
25 who had Apgar scores of 10 at both 1 and 5 minutes, children whose 1-minute Apgar score  
26  
27 decreased from 10 to a 5-minute Apgar score of <10, had 1.53 times the rate of developmental  
28  
29 vulnerability (aRR 1.53, 95% CI 1.08-2.17).  
30  
31  
32  
33  
34  
35  
36

## 37 DISCUSSION

38  
39 In this population-based study, we found graded, continuously increasing risks of developmental  
40  
41 vulnerability and special needs at 5 years of age with decreasing 1- and 5-minute Apgar scores. A  
42  
43 low Apgar score at 5 minutes was more strongly associated with developmental vulnerability and  
44  
45 special needs than a low Apgar score at 1 minute. In particular, children with “normal” 5-minute  
46  
47 Apgar scores of 7, 8 and 9 were more likely to have developmental vulnerability compared with  
48  
49 children with 5-minute Apgar scores of 10. Similarly, children who had Apgar scores of 7 or 8 at 5  
50  
51 minutes had higher risks of having special needs compared with those with a 5-minute Apgar score  
52  
53 of 10. Furthermore, children with a 1-minute Apgar score in the normal range (7 to 10) had an  
54  
55  
56  
57  
58  
59  
60

1  
2 increased risk of developmental vulnerability, if their Apgar score at 5 minutes was <10.

3  
4 Particularly noteworthy was a reduction in the Apgar score from 10 at 1 minute to 7-9 at 5 minutes,  
5  
6 as this substantially increased the risk of developmental vulnerability.  
7  
8  
9

10  
11 Our results confirm previous findings from a smaller cohort, which showed that developmental  
12  
13 adversity extended in a linear fashion across the full range of Apgar scores.<sup>13</sup> Both research and  
14  
15 clinical practice generally emphasize the increased risks of adverse outcomes associated with very  
16  
17 low and less common Apgar scores (i.e., <7 or <4). Our results suggest that the negative  
18  
19 association between Apgar score and developmental adversity or special needs extends across the  
20  
21 full range of scores. Consistent with our findings, previous studies have shown a significant linear  
22  
23 relationship between each one-point decrease in 5 and 10 minutes Apgar scores and increasing risk  
24  
25 of epilepsy, cerebral palsy, and needing education in a special school.<sup>12 14</sup> While profound perinatal  
26  
27 events can cause death or obvious neurological deficits, milder insults may sometimes cause subtle  
28  
29 cognitive impairment only detectable as the child grows older, and apparent only at a population  
30  
31 level.  
32  
33  
34  
35  
36  
37  
38

39 Our study also showed that changes in Apgar scores from 1 to 5 minutes were associated with  
40  
41 developmental vulnerability. This is in agreement with previous studies showing that changes in  
42  
43 Apgar scores immediately after birth influence risks of cerebral palsy and epilepsy.<sup>12 15 16</sup> To our  
44  
45 knowledge, this is the first study that examined risks of developmental adversity in relation to  
46  
47 changes in Apgar scores from 1 to 5 minutes. Current guidelines define “normal” Apgar scores as 7  
48  
49 or more at 1 minute and 8 or more at 5 minutes, indicating that the baby does not require assistance  
50  
51 if scores are within these ranges.<sup>33</sup> However, our results reveal that lower scores within the normal  
52  
53 range (7-9) and even a slight reduction in score from 10 at 1 minute to 9 at 5 minutes are both  
54  
55  
56  
57  
58  
59  
60

1  
2 associated with a significant increase in the risk of developmental vulnerability. Similarly, infants  
3 who have low Apgar scores for prolonged, or even brief periods are reported to have a higher risk  
4 of poor IQ scores at age 18, even if the infants recover subsequently.<sup>6</sup> The higher developmental  
5 vulnerability observed among infants whose optimal Apgar score (of 10) at 1 minute falls with  
6 time after birth may be important clinically; such a progression may indicate problems with  
7 physiologic circulatory, respiratory or central nervous system changes that follow delivery.  
8 Deterioration in the Apgar score immediately after birth, therefore, warrants re-evaluation of the  
9 infant and close clinical scrutiny in order to exclude congenital abnormalities and drug induced  
10 depression of the central nervous system.  
11  
12  
13  
14  
15  
16  
17  
18  
19  
20  
21  
22  
23  
24  
25

26 The strengths of our study included the ability to access comprehensive health and education-  
27 related databases at the population level. By using a teacher reported instrument, no reliance was  
28 placed on parent or self-report of developmental health. Nonetheless, there may be some individual  
29 differences in teachers' ability to evaluate developmental health on the EDI.<sup>25</sup> Further, our study  
30 was restricted to the comparatively healthy subset of all term live births, as children with severe  
31 disabilities may not have enrolled in kindergarten or may have enrolled in special needs schools.  
32 Furthermore, although the EDI has broad coverage across British Columbia, it is collected less  
33 frequently in independent schools (30% coverage). We recognize that the Apgar score as recorded  
34 in medical charts represents routine clinical practice,<sup>34</sup> and is prone to interobserver variability,<sup>34</sup>  
35 specifically in intubated newborn babies.<sup>35</sup> However, the quality of Apgar score values should not  
36 differ between children with and without subsequent diagnosed developmental vulnerability.  
37 Nevertheless, measurement errors inherent in routinely recorded Apgar scores (and possibly the  
38 EDI) may potentially explain the lack of an evident dose-response relationship between Apgar  
39 scores and developmental vulnerability. Lastly, we acknowledge that the incidence of adverse  
40  
41  
42  
43  
44  
45  
46  
47  
48  
49  
50  
51  
52  
53  
54  
55  
56  
57  
58  
59  
60

1  
2 outcomes in the setting of normal Apgar scores is rare and a low Apgar in the normal range is a  
3  
4 poor predictor of developmental vulnerability for the individual infant.  
5  
6  
7

8  
9 In summary, our study showed that the risk of developmental vulnerability and special needs at 5  
10 years of age was inversely associated with 1- and 5-minute Apgar scores across their entire range.  
11  
12 Furthermore, improvements in Apgar scores between 1 and 5 minutes among children with a 1-  
13 minute Apgar score of 7 to 9 were associated with a lower risk of developmental vulnerability.  
14  
15 These results provide clinicians with valuable prognostic information and the justification to  
16  
17 carefully monitor infants who are even mildly compromised at 1 and 5 minutes. Future studies  
18  
19 should examine the underlying mechanism by which Apgar scores in the normal range could  
20  
21 influence long-term neurodevelopmental outcomes.  
22  
23  
24  
25  
26  
27  
28  
29  
30  
31  
32  
33  
34  
35  
36  
37  
38  
39  
40  
41  
42  
43  
44  
45  
46  
47  
48  
49  
50  
51  
52  
53  
54  
55  
56  
57  
58  
59  
60

## Acknowledgment

**Funding support:** No funding.

**Role of the funder:** None.

### Contributor's statement:

Neda Razaz conceptualized and designed the study, analyzed the data, drafted the initial manuscript, and finalized the manuscript based on coauthor feedback. She had full access to all the data in the study and takes responsibility for the integrity of the data and the accuracy of the data analysis.

Sven Chattingius, Martina Persson, Kristina Tedroff, and Sarka Lisonkova, reviewed and commented on the initial and final analyses, provided feedback on the initial draft of the manuscript and approved the final version of the manuscript.

KS Joseph assisted with conceptualization and design of the study, and reviewed and commented on the initial and final analyses, provided feedback on the initial draft of the manuscript and approved the final version of the manuscript.

**Financial disclosure:** NR is supported by a postdoctoral fellowship award from the Canadian Institutes of Health Research (CIHR). KSJ is supported by the BC Children's Hospital Research Institute.

**Conflict of interest:** None

**A data sharing statement:** No additional data available

**Disclosure:** All inferences, opinions, and conclusions drawn in this journal article are those of the authors, and do not reflect the opinions or policies of the Data Steward(s).

**REFERENCE:**

1. Apgar V. A proposal for a new method of evaluation of the newborn. *Current Research Anaesth* 1953;32:260-67.
2. Bharti B, Bharti S. A review of the Apgar score indicated that contextualization was required within the contemporary perinatal and neonatal care framework in different settings. *J Clin Epidemiol* 2005;58(2):121-29.
3. Newborn AAoPCoFa. The Apgar Score. *Pediatrics* 2015;136(4):819.
4. Li J, Cnattingus S, Gissler M, et al. The 5-minute Apgar score as a predictor of childhood cancer: a population-based cohort study in five million children. *BMJ open* 2012;2(4)
5. Moore EA, Harris F, Laurens KR, et al. Birth outcomes and academic achievement in childhood: A population record linkage study. *Journal of Early Childhood Research* 2014:1476718X13515425.
6. Odd DE, Rasmussen F, Gunnell D, et al. A cohort study of low Apgar scores and cognitive outcomes. *Archives of Disease in Childhood-Fetal and Neonatal Edition* 2008;93(2):F115-F20.
7. Ehrenstein V, Pedersen L, Grijsota M, et al. Association of Apgar score at five minutes with long-term neurologic disability and cognitive function in a prevalence study of Danish conscripts. *BMC Pregnancy Childbirth* 2009;9(1):14.
8. Marschik PB, Einspieler C, Garzarolli B, et al. Events at early development: Are they associated with early word production and neurodevelopmental abilities at the preschool age? *Early Hum Dev* 2007;83(2):107-14.
9. Krebs L, Langhoff-Roos J, Thorngren-Jerneck K. Long-term outcome in term breech infants with low Apgar score—a population-based follow-up. *European Journal of Obstetrics & Gynecology and Reproductive Biology* 2001;100(1):5-8.
10. Cnattingius S, Norman M, Granath F, et al. Apgar Score Components at 5 Minutes: Risks and Prediction of Neonatal Mortality. *Paediatr Perinat Epidemiol* 2017;31(4):328-37.
11. Tweed EJ, Mackay DF, Nelson SM, et al. Five-minute Apgar score and educational outcomes: retrospective cohort study of 751 369 children. *Archives of Disease in Childhood-Fetal and Neonatal Edition* 2016;101(2):F121-F26.
12. Persson M, Razaz N, Tedroff K, et al. Five and 10 minute Apgar scores and risks of cerebral palsy and epilepsy: population based cohort study in Sweden. *BMJ* 2018;360 doi: 10.1136/bmj.k207
13. Razaz N, Boyce WT, Brownell M, et al. Five-minute Apgar score as a marker for developmental vulnerability at 5 years of age. *Archives of Disease in Childhood - Fetal and Neonatal Edition* 2016;101(2):F114-F20. doi: 10.1136/archdischild-2015-308458
14. Stuart A, Olausson PO, Källen K. Apgar scores at 5 minutes after birth in relation to school performance at 16 years of age. *Obstet Gynecol* 2011;118(2, Part 1):201-08.
15. Sun Y, Vestergaard M, Pedersen CB, et al. Apgar scores and long-term risk of epilepsy. *Epidemiology (Cambridge, Mass)* 2006;17(3):296-301. doi: 10.1097/01.ede.0000208478.47401.b6 [published Online First: 2006/03/30]
16. Moster D, Lie RT, Irgens LM, et al. The association of Apgar score with subsequent death and cerebral palsy: A population-based study in term infants. *The Journal of pediatrics* 2001;138(6):798-803. doi: 10.1067/mpd.2001.114694 [published Online First: 2001/06/08]



17. British Columbia Ministry of Health [creator] [2012]: Discharge Abstract Database (Hospital Separations). *Population Data BC [publisher];Data Extract. MOH* (2012)(<http://www.popdata.bc.ca/data>)
18. British Columbia Vital Statistics Agency [creator] (2012): Vital Statistics Births. *Population Data BC [publisher];Data Extract BC Vital Statistics Agency* (2012)(<http://www.popdata.bc.ca/data>)
19. Statistics Canada [creator] (2009): Statistics Canada Income Band Data. Catalogue Number: 13C0016. *Population Data BC [publisher]; Population Data BC* (2017)(<http://www.popdata.bc.ca/data>)
20. British Columbia Ministry of Health [creator] [2012]: Consolidation File (MSP Registration & Premium Billing). *Population Data BC [publisher];Data Extract. MOH* (2012)(<http://www.popdata.bc.ca/data>)
21. Janus M, Offord DR. Development and psychometric properties of the early development instrument (EDI): A measure of children's school readiness. *Can J Behav Sci* 2007;39(1):1-22.
22. Human Early Learning Partnership [creator] (2012): Early Development Instrument. *Population Data BC [publisher];Data Extract. Human Early Learning Partnership. Vancouver, BC: University of British Columbia, School of Population and Public Health* (2012).( <http://www.popdata.bc.ca/data>)
23. Duncan GJ, Dowsett CJ, Claessens A, et al. School readiness and later achievement. *Dev Psychol* 2007;43(6):1428.
24. Janus M, Duku E. The School Entry Gap: Socioeconomic, Family, and Health Factors Associated with Children's School Readiness to Learn. *Early Education* 2007;18(3):375-403.
25. Measuring in support of early childhood development: The Normative II report [Report ]. The Offord Centre for Child Studies 2012 [Available from: [http://www.offordcentre.com/readiness/files/updated\\_normative\\_II.pdf](http://www.offordcentre.com/readiness/files/updated_normative_II.pdf) accessed April 1, 2013.
26. Brinkman S, Sayers M, Goldfeld S, et al. Population monitoring of language and cognitive development in Australia: The Australian Early Development Index. *Int J Speech Lang Pathol* 2009;11(5):419-30.
27. Kramer MS, Platt RW, Wen SW, et al. A new and improved population-based Canadian reference for birth weight for gestational age. *Pediatrics* 2001;108(2):e35-e35.
28. Martens P. Health Inequities in Manitoba: Is the Socioeconomic Gap in Health Widening Or Narrowing Over Time? Winnipeg: Manitoba Centre for Health Policy, University of Manitoba, 2010.
29. Mustard C, Derksen S, Berthelot J, et al. Assessing ecological proxies for household income: a comparison of household income and neighborhood level income measures in the study of population health status. *Health and Place* 1999;5:157-71.
30. Krieger N. Overcoming the absence of socioeconomic data in medical records: Validation and application of a census-based methodology. *Am J Public Health* 1992;82:703-10.
31. Zou G. A Modified Poisson Regression Approach to Prospective Studies with Binary Data. *Am J Epidemiol* 2004;159(7):702-06. doi: 10.1093/aje/kwh090
32. Santos R, Brownell MD, Ekuma O, et al. The Early Development Instrument (EDI) in Manitoba: Linking Socioeconomic Adversity and Biological Vulnerability at Birth to Children's Outcomes at Age 5. Winnipeg, MB: Manitoba Centre for Health Policy, University of Manitoba, 2012.



- 1
- 2
- 3 33. Pediatrics AAo. The APGAR score. *Adv Neonatal Care* 2006;6(4):220-23.
- 4 34. O'Donnell CP, Kamlin COF, Davis PG, et al. Interobserver variability of the 5-minute Apgar
- 5 score. *The Journal of pediatrics* 2006;149(4):486-89.
- 6 35. Lopriore E, van Burk GF, Walther FJ, et al. Correct use of the Apgar score for resuscitated and
- 7 intubated newborn babies: questionnaire study. *BMJ* 2004;329(7458):143-44.
- 8
- 9
- 10
- 11
- 12
- 13
- 14
- 15
- 16
- 17
- 18
- 19
- 20
- 21
- 22
- 23
- 24
- 25
- 26
- 27
- 28
- 29
- 30
- 31
- 32
- 33
- 34
- 35
- 36
- 37
- 38
- 39
- 40
- 41
- 42
- 43
- 44
- 45
- 46
- 47
- 48
- 49
- 50
- 51
- 52
- 53
- 54
- 55
- 56
- 57
- 58
- 59
- 60

For peer review only

**Table 1. Maternal and birth characteristics according to Apgar score at five minutes among singleton term live births, British Columbia, 1993-2009**

| Maternal and birth characteristics | Total          | Apgar 0-3<br>(n=147) | Apgar 4-6<br>(n=1328) | Apgar 7<br>(n=2375) | Apgar 8<br>(n=7666) | Apgar 9<br>(n=101191) | Apgar 10<br>(n=37374) |
|------------------------------------|----------------|----------------------|-----------------------|---------------------|---------------------|-----------------------|-----------------------|
|                                    | No. (%)        | %                    | %                     | %                   | %                   | %                     | %                     |
| Total                              | 150081 (100)   |                      |                       |                     |                     |                       |                       |
| Maternal age (years)               |                |                      |                       |                     |                     |                       |                       |
| ≤19                                | 6170 (4.11)    | 0.15                 | 1.41                  | 1.93                | 5.80                | 64.17                 | 26.55                 |
| 20-24                              | 24637 (16.42)  | 0.09                 | 1.11                  | 1.77                | 5.88                | 64.83                 | 26.32                 |
| 25-29                              | 43832 (29.21)  | 0.10                 | 0.88                  | 1.64                | 5.19                | 66.66                 | 25.54                 |
| 30-34                              | 47332 (31.54)  | 0.10                 | 0.80                  | 1.50                | 4.76                | 68.45                 | 24.39                 |
| ≥35                                | 28081 (18.71)  | 0.09                 | 0.72                  | 1.39                | 4.73                | 69.89                 | 23.17                 |
| Missing                            | 29 (0.02)      | 0                    | <17.24                | <17.24              | <17.24              | 58.62                 | 31.03                 |
| Socioeconomic status               |                |                      |                       |                     |                     |                       |                       |
| 5th quintile [highest]             | 27519 (18.34)  | 0.10                 | 0.90                  | 1.64                | 5.00                | 66.88                 | 25.47                 |
| 4th quintile                       | 31282 (20.84)  | 0.11                 | 0.83                  | 1.69                | 5.38                | 66.79                 | 25.21                 |
| 3rd quintile                       | 30939 (20.61)  | 0.10                 | 0.86                  | 1.65                | 5.18                | 67.47                 | 24.74                 |
| 2nd quintile                       | 31266 (20.83)  | 0.06                 | 0.84                  | 1.48                | 5.08                | 67.73                 | 24.80                 |
| 1st quintile [lowest]              | 28889 (19.25)  | 0.12                 | 1.00                  | 1.45                | 4.88                | 68.25                 | 24.30                 |
| Missing                            | 186 (0.12)     | 0                    | <2.69                 | <2.69               | 3.23                | 66.13                 | 28.49                 |
| Married                            |                |                      |                       |                     |                     |                       |                       |
| Yes                                | 103099 (68.70) | 0.09                 | 0.78                  | 1.47                | 4.73                | 68.43                 | 24.49                 |
| No                                 | 43374 (28.90)  | 0.12                 | 1.13                  | 1.85                | 6.01                | 64.93                 | 25.95                 |
| Missing                            | 3608 (2.40)    | 0.17                 | 0.89                  | 1.47                | 4.93                | 68.63                 | 23.92                 |
| Infant's sex                       |                |                      |                       |                     |                     |                       |                       |
| Female                             | 73809 (49.18)  | 0.08                 | 0.78                  | 1.46                | 4.91                | 67.17                 | 25.61                 |
| Male                               | 76272 (50.82)  | 0.12                 | 0.99                  | 1.70                | 5.30                | 67.67                 | 24.22                 |
| Birth order                        |                |                      |                       |                     |                     |                       |                       |
| 1                                  | 67516 (44.99)  | 0.12                 | 1.25                  | 2.09                | 6.13                | 67.92                 | 22.49                 |
| 2                                  | 56025 (37.33)  | 0.09                 | 0.63                  | 1.24                | 4.32                | 67.51                 | 26.22                 |
| 3                                  | 19239 (12.82)  | 0.07                 | 0.46                  | 1.05                | 4.13                | 66.66                 | 27.63                 |
| ≥4                                 | 7301 (4.86)    | <0.07                | 0.56                  | 0.99                | 4.34                | 64.17                 | 29.91                 |
| Gestational age                    |                |                      |                       |                     |                     |                       |                       |
| 37 weeks                           | 8966 (5.97)    | 0.10                 | 1.08                  | 2.02                | 6.88                | 68.02                 | 21.89                 |

|    |                                            |                |             |             |             |             |             |             |
|----|--------------------------------------------|----------------|-------------|-------------|-------------|-------------|-------------|-------------|
| 1  |                                            |                |             |             |             |             |             |             |
| 2  |                                            |                |             |             |             |             |             |             |
| 3  | 38 weeks                                   | 25821 (17.20)  | 0.05        | 0.74        | 1.37        | 4.67        | 68.21       | 24.96       |
| 4  | 39 weeks                                   | 37408 (34.03)  | 0.09        | 0.76        | 1.32        | 4.36        | 68.57       | 24.89       |
| 5  | 40 weeks                                   | 51079 (34.03)  | 0.10        | 0.82        | 1.65        | 5.05        | 66.31       | 26.08       |
| 6  |                                            |                |             |             |             |             |             |             |
| 7  | 41 weeks                                   | 25040 (16.68)  | 0.15        | 1.22        | 1.87        | 6.08        | 67.38       | 23.29       |
| 8  | 42-44 weeks                                | 1767 (1.18)    | <0.28       | 1.58        | 2.09        | 6.51        | 61.35       | 28.3        |
| 9  |                                            |                |             |             |             |             |             |             |
| 10 | Birth weight-for-gestational age           |                |             |             |             |             |             |             |
| 11 | Appropriate                                | 121035 (80.65) | 0.09        | 0.84        | 1.51        | 4.96        | 67.42       | 25.18       |
| 12 | Small                                      | 11581 (7.72)   | 0.19        | 1.35        | 2.20        | 6.16        | 67.04       | 23.06       |
| 13 | Large                                      | 17445 (11.62)  | 0.08        | 0.85        | 1.65        | 5.47        | 67.76       | 24.18       |
| 14 |                                            |                |             |             |             |             |             |             |
| 15 | Missing                                    | 20 (0.01)      | <25.00      | <25.00      | 0           | 0           | 40.00       | 50.00       |
| 16 |                                            |                |             |             |             |             |             |             |
| 17 |                                            |                |             |             |             |             |             |             |
| 18 | Child's age at EDI data collection (years) |                |             |             |             |             |             |             |
| 19 | Means (SD)                                 | 5.70 (0.32)    | 5.67 (0.30) | 5.65 (0.30) | 5.66 (0.30) | 5.66 (0.30) | 5.65 (0.30) | 5.65 (0.30) |
| 20 |                                            |                |             |             |             |             |             |             |
| 21 |                                            |                |             |             |             |             |             |             |
| 22 |                                            |                |             |             |             |             |             |             |
| 23 |                                            |                |             |             |             |             |             |             |
| 24 |                                            |                |             |             |             |             |             |             |
| 25 |                                            |                |             |             |             |             |             |             |
| 26 |                                            |                |             |             |             |             |             |             |
| 27 |                                            |                |             |             |             |             |             |             |
| 28 |                                            |                |             |             |             |             |             |             |
| 29 |                                            |                |             |             |             |             |             |             |
| 30 |                                            |                |             |             |             |             |             |             |
| 31 |                                            |                |             |             |             |             |             |             |
| 32 |                                            |                |             |             |             |             |             |             |
| 33 |                                            |                |             |             |             |             |             |             |
| 34 |                                            |                |             |             |             |             |             |             |
| 35 |                                            |                |             |             |             |             |             |             |
| 36 |                                            |                |             |             |             |             |             |             |
| 37 |                                            |                |             |             |             |             |             |             |
| 38 |                                            |                |             |             |             |             |             |             |
| 39 |                                            |                |             |             |             |             |             |             |
| 40 |                                            |                |             |             |             |             |             |             |
| 41 |                                            |                |             |             |             |             |             |             |
| 42 |                                            |                |             |             |             |             |             |             |
| 43 |                                            |                |             |             |             |             |             |             |
| 44 |                                            |                |             |             |             |             |             |             |
| 45 |                                            |                |             |             |             |             |             |             |
| 46 |                                            |                |             |             |             |             |             |             |
| 47 |                                            |                |             |             |             |             |             |             |
| 48 |                                            |                |             |             |             |             |             |             |
| 49 |                                            |                |             |             |             |             |             |             |
| 50 |                                            |                |             |             |             |             |             |             |
| 51 |                                            |                |             |             |             |             |             |             |
| 52 |                                            |                |             |             |             |             |             |             |
| 53 |                                            |                |             |             |             |             |             |             |
| 54 |                                            |                |             |             |             |             |             |             |
| 55 |                                            |                |             |             |             |             |             |             |
| 56 |                                            |                |             |             |             |             |             |             |
| 57 |                                            |                |             |             |             |             |             |             |
| 58 |                                            |                |             |             |             |             |             |             |
| 59 |                                            |                |             |             |             |             |             |             |
| 60 |                                            |                |             |             |             |             |             |             |

**Table 2. Apgar scores at one and five minutes and rate ratios for developmental vulnerability among singleton term live births, British Columbia, Canada**

| Apgar Score           | Total No. of children | No. with outcome | %           | Developmental vulnerability |                  |
|-----------------------|-----------------------|------------------|-------------|-----------------------------|------------------|
|                       |                       |                  |             | Crude                       | Adjusted*        |
| <b>1-Min Apgar</b>    | <b>150081</b>         | <b>45334</b>     | <b>30.2</b> |                             |                  |
| 0                     | 24                    | 9                | 37.5        | 1.25 (0.74–2.10)            | 1.08 (0.64–1.83) |
| 1                     | 469                   | 161              | 34.3        | 1.15 (1.00–1.31)            | 1.16 (1.02–1.32) |
| 2                     | 1060                  | 329              | 31.0        | 1.04 (0.93–1.15)            | 1.03 (0.93–1.14) |
| 3                     | 1760                  | 546              | 31.0        | 1.04 (0.95–1.13)            | 1.03 (0.95–1.13) |
| 4                     | 2582                  | 814              | 31.5        | 1.05 (0.97–1.14)            | 1.07 (0.99–1.15) |
| 5                     | 4069                  | 1261             | 31.0        | 1.03 (0.96–1.11)            | 1.05 (0.98–1.12) |
| 6                     | 6975                  | 2124             | 30.5        | 1.02 (0.95–1.08)            | 1.04 (0.98–1.11) |
| 7                     | 12019                 | 3648             | 30.4        | 1.01 (0.95–1.08)            | 1.03 (0.97–1.09) |
| 8                     | 38671                 | 11666            | 30.2        | 1.01 (0.95–1.06)            | 1.02 (0.96–1.08) |
| 9                     | 79369                 | 23852            | 30.1        | 1.00 (0.95–1.06)            | 1.00 (0.95–1.06) |
| 10                    | 3083                  | 924              | 30.0        | 1.00 (Reference)            | 1.00 (Reference) |
| P for trend           |                       |                  |             |                             | <0.001           |
| Per one unit of Apgar |                       |                  |             |                             | 0.99 (0.98-0.99) |
| <b>5-Min Apgar</b>    |                       |                  |             |                             |                  |
| 0                     | 20                    | 7                | 35.0        | 1.18 (0.65–2.15)            | 1.16 (0.62–2.17) |
| 1                     | 16                    | 9                | 56.3        | 1.90 (1.24–2.93)            | 1.88 (1.27–2.77) |
| 2                     | 28                    | 13               | 46.4        | 1.57 (1.05–2.34)            | 1.57 (1.03–2.39) |
| 3                     | 83                    | 30               | 36.2        | 1.22 (0.92–1.63)            | 1.25 (0.93–1.67) |
| 4                     | 106                   | 43               | 40.6        | 1.37 (1.09–1.73)            | 1.33 (1.06–1.67) |
| 5                     | 290                   | 85               | 29.3        | 0.99 (0.83–1.19)            | 0.98 (0.82–1.17) |
| 6                     | 932                   | 306              | 32.8        | 1.11 (1.01–1.22)            | 1.08 (0.99–1.18) |
| 7                     | 2375                  | 740              | 31.2        | 1.05 (0.99–1.12)            | 1.08 (1.01–1.14) |
| 8                     | 7666                  | 2387             | 31.1        | 1.05 (1.02–1.09)            | 1.06 (1.02–1.10) |
| 9                     | 101191                | 30668            | 30.3        | 1.03 (1.01–1.04)            | 1.02 (1.00–1.04) |
| 10                    | 37374                 | 11046            | 29.6        | 1.00 (Reference)            | 1.00 (Reference) |
| P for trend           |                       |                  |             |                             | <0.001           |
| Per one unit of Apgar |                       |                  |             |                             | 0.98 (0.97-0.99) |

\*Adjusted for child's sex (male vs female), child's age at EDI completion (years), socioeconomic status (1st quintile, 2nd quintile, 3rd quintile, 4th quintile vs 5th quintile) child's first language (other vs English), birth order (2, 3, +4 vs 1), birth weight-for-gestational age (large, small vs appropriate), gestational age (weeks).

**Table 3. Apgar score at one and five minutes and rate ratios for special needs status among singleton term live births in British Columbia, Canada**

| Apgar Score           | Total No. of children | No. with outcome | %          | Special Needs       |                  |
|-----------------------|-----------------------|------------------|------------|---------------------|------------------|
|                       |                       |                  |            | Rate Ratio (95% CI) |                  |
|                       |                       |                  |            | Crude               | Adjusted*        |
| <b>1-Min Apgar</b>    | <b>148699</b>         | <b>3644</b>      | <b>2.5</b> |                     |                  |
| 0                     | 22                    | <5               | 4.6        | 1.94 (0.28–13.4)    | 1.44 (0.23–8.97) |
| 1                     | 463                   | 26               | 5.6        | 2.40 (1.55–3.72)    | 2.23 (1.44–3.46) |
| 2                     | 1054                  | 45               | 4.3        | 1.82 (1.26–2.63)    | 1.72 (1.19–2.48) |
| 3                     | 1743                  | 53               | 3.0        | 1.30 (0.91–1.84)    | 1.23 (0.86–1.74) |
| 4                     | 2554                  | 69               | 2.7        | 1.15 (0.83–1.60)    | 1.09 (0.79–1.52) |
| 5                     | 4032                  | 136              | 3.4        | 1.44 (1.09–1.91)    | 1.39 (1.05–1.85) |
| 6                     | 6894                  | 191              | 2.8        | 1.18 (0.90–1.55)    | 1.16 (0.89–1.52) |
| 7                     | 11903                 | 298              | 2.5        | 1.07 (0.83–1.38)    | 1.06 (0.82–1.37) |
| 8                     | 38300                 | 946              | 2.5        | 1.06 (0.83–1.34)    | 1.07 (0.84–1.35) |
| 9                     | 78701                 | 1808             | 2.3        | 0.98 (0.78–1.24)    | 1.00 (0.79–1.26) |
| 10                    | 3033                  | 71               | 2.3        | 1.00 (Reference)    | 1.00 (Reference) |
| P for trend           |                       |                  |            |                     | <0.001           |
| Per one unit of Apgar |                       |                  |            |                     | 0.99 (0.98-0.99) |
| <b>5-Min Apgar</b>    |                       |                  |            |                     |                  |
| 0                     | 17                    | <5               | <29.4      | 2.51 (0.37–16.8)    | 2.59 (0.41–16.3) |
| 1                     | 15                    | <5               | <33.3      | 5.69 (1.56–20.7)    | 5.13 (1.45–18.1) |
| 2                     | 28                    | <5               | <17.9      | 6.10 (2.46–15.2)    | 5.17 (2.01–13.3) |
| 3                     | 83                    | 9                | 10.8       | 4.63 (2.49–8.61)    | 3.78 (2.03–7.02) |
| 4                     | 103                   | 7                | 6.8        | 2.90 (1.41–5.95)    | 2.59 (1.25–5.35) |
| 5                     | 289                   | 8                | 2.8        | 1.18 (0.59–2.35)    | 1.10 (0.56–2.16) |
| 6                     | 928                   | 36               | 3.9        | 1.66 (1.19–2.30)    | 1.49 (1.07–2.06) |
| 7                     | 2342                  | 74               | 3.2        | 1.35 (1.07–1.70)    | 1.28 (1.01–1.61) |
| 8                     | 7597                  | 225              | 3.0        | 1.26 (1.09–1.46)    | 1.20 (1.03–1.38) |
| 9                     | 100281                | 2411             | 2.4        | 1.03 (0.95–1.11)    | 1.01 (0.94–1.09) |
| 10                    | 37016                 | 867              | 2.3        | 1.00 (Reference)    | 1.00 (Reference) |
| P for trend           |                       |                  |            |                     | <0.001           |
| Per one unit of Apgar |                       |                  |            |                     | 0.98 (0.97-0.99) |

\*Adjusted for child's sex (male vs female), child's age at EDI completion (years), socioeconomic status (1st quintile, 2nd quintile, 3rd quintile, 4th quintile vs 5th quintile) child's first language (other vs English), birth order (2, 3, +4 vs 1), birth weight-for-gestational age (large, small vs appropriate), gestational age (weeks).

**Table 4. Rate ratios for developmental vulnerability according to combination of Apgar scores at one and five minutes, singleton term live births, British Columbia, Canada**

| 1-min Apgar | 5-min Apgar | Total No. of children | No. with outcome (%) | Developmental vulnerability |                  |             |
|-------------|-------------|-----------------------|----------------------|-----------------------------|------------------|-------------|
|             |             |                       |                      | Crude                       | Adjusted*        | P for trend |
| 7           | <7          | 20                    | 9 (45.0)             | 1.62 (0.99-2.65)            | 1.34 (0.80-2.25) |             |
| 7           | 7           | 172                   | 56 (32.6)            | 1.18 (0.93-1.48)            | 1.18 (0.94-1.47) |             |
| 7           | 8           | 1987                  | 629 (31.7)           | 1.14 (1.02-1.28)            | 1.12 (1.01-1.23) |             |
| 7           | 9           | 8700                  | 2637 (30.3)          | 1.09 (0.99-1.20)            | 1.08 (0.99-1.19) |             |
| 7           | 10          | 1140                  | 317 (27.8)           | 1.00 (Reference)            | 1.00 (Reference) | 0.024       |
| 8           | <8          | 66                    | 17 (25.8)            | 0.85 (0.56-1.28)            | 0.71 (0.47-1.07) |             |
| 8           | 8           | 1337                  | 420 (31.4)           | 1.03 (0.94-1.13)            | 1.01 (0.92-1.10) |             |
| 8           | 9           | 33255                 | 10007 (30.1)         | 0.99 (0.94-1.04)            | 0.97 (0.93-1.02) |             |
| 8           | 10          | 4013                  | 1222 (30.5)          | 1.00 (Reference)            | 1.00 (Reference) | 0.36        |
| 9           | <9          | 140                   | 48 (34.3)            | 1.17 (0.93-1.47)            | 1.10 (0.88-1.38) |             |
| 9           | 9           | 50976                 | 15501 (30.4)         | 1.03 (1.01-1.06)            | 1.03 (1.01-1.05) |             |
| 9           | 10          | 28253                 | 8303 (29.4)          | 1.00 (Reference)            | 1.00 (Reference) | 0.009       |
| 10          | <10         | 26                    | 13 (50.0)            | 1.68 (1.14-2.47)            | 1.53 (1.08-2.17) |             |
| 10          | 10          | 3057                  | 911 (29.8)           | 1.00 (Reference)            | 1.00 (Reference) | 0.016†      |

\*Adjusted for child's sex (male vs female), child's age at EDI completion (years), socioeconomic status (1st quintile, 2nd quintile, 3rd quintile, 4th quintile vs 5th quintile) child's first language (others vs English), birth order (2, 3, +4 vs 1), birth weight-for gestational age (large, small vs appropriate), gestational age (weeks).

† P value for difference in rates.

1  
2  
3  
4  
5  
6  
7  
8  
9  
10  
11  
12  
13  
14  
15  
16  
17  
18  
19  
20  
21  
22  
23  
24  
25  
26  
27  
28  
29  
30  
31  
32  
33  
34  
35  
36  
37  
38  
39  
40  
41  
42  
43  
44  
45  
46  
47  
48  
49  
50  
51  
52  
53  
54  
55  
56  
57  
58  
59  
60

**Figure 1 Legend:** Rates of vulnerability within the five Early Development Instrument domains by Apgar score at 5 minutes, British Columbia, Canada

For peer review only

**Figure 1:** Rates of vulnerability within the five Early Development Instrument domains by Apgar score at 5-minute, British Columbia, Canada





**Supplementary Table 1. Five domains of the Early Development Instrument**

| EDI domains                                | Characteristics addressed                                                                                                                                                                  |
|--------------------------------------------|--------------------------------------------------------------------------------------------------------------------------------------------------------------------------------------------|
| Physical health and well-being             | Children's fine and gross motor skills, energy levels, fatigue and clumsiness                                                                                                              |
| Social competence                          | Self-confidence, tolerance, ability to get along with other children, to accept responsibility for their own actions, to work independently                                                |
| Emotional maturity                         | Children's general emotional health and maturity. It also identifies minor problems with aggression, restlessness, distractibility or inattentiveness as well as excessive regular sadness |
| Language and cognitive skills              | Mastery of the basics of reading and writing, interest in books, and numerical skills                                                                                                      |
| Communication skills and general knowledge | Children's general knowledge, their ability to articulate clearly and their ability to understand and communicate in English                                                               |

**Supplementary Table 2. Apgar score at one and five minutes and rate ratios for vulnerability in each domain of the EDI, among singleton term live births in British Columbia, Canada**

| Apgar Score        | Physical health domain |        |                  | Social domain    |        |                  | Emotional domain |        |                  |
|--------------------|------------------------|--------|------------------|------------------|--------|------------------|------------------|--------|------------------|
|                    | No. with outcome       | %      | Adjusted*        | No. with outcome | %      | Adjusted*        | No. with outcome | %      | Adjusted*        |
| <b>1-Min Apgar</b> |                        |        |                  |                  |        |                  |                  |        |                  |
| 0                  | <5                     | <20.83 | 0.90 (0.37–2.19) | <5               | <20.83 | 1.01 (0.40–2.51) | <5               | <20.83 | 0.71 (0.25–1.96) |
| 1                  | 88                     | 18.76  | 1.24 (1.02–1.52) | 82               | 17.48  | 1.30 (1.05–1.61) | 83               | 17.7   | 1.25 (1.01–1.54) |
| 2                  | 179                    | 16.89  | 1.09 (0.93–1.27) | 142              | 13.40  | 0.97 (0.82–1.16) | 147              | 13.87  | 0.96 (0.81–1.14) |
| 3                  | 283                    | 16.08  | 1.06 (0.93–1.21) | 246              | 13.98  | 1.03 (0.89–1.19) | 273              | 15.51  | 1.09 (0.95–1.25) |
| 4                  | 410                    | 15.88  | 1.06 (0.94–1.19) | 349              | 13.52  | 1.02 (0.89–1.16) | 370              | 14.33  | 1.03 (0.91–1.18) |
| 5                  | 644                    | 15.83  | 1.04 (0.93–1.16) | 569              | 13.98  | 1.06 (0.94–1.19) | 563              | 13.84  | 1.01 (0.90–1.13) |
| 6                  | 1076                   | 15.43  | 1.02 (0.93–1.13) | 925              | 13.26  | 1.02 (0.92–1.14) | 932              | 13.36  | 1.00 (0.89–1.11) |
| 7                  | 1889                   | 15.72  | 1.03 (0.94–1.13) | 1555             | 12.94  | 1.00 (0.90–1.11) | 1500             | 12.48  | 0.94 (0.85–1.04) |
| 8                  | 5876                   | 15.19  | 1.01 (0.93–1.10) | 4993             | 12.91  | 1.01 (0.92–1.11) | 4836             | 12.51  | 0.96 (0.87–1.05) |
| 9                  | 11839                  | 14.92  | 0.99 (0.91–1.08) | 9858             | 12.42  | 0.97 (0.89–1.07) | 9608             | 12.11  | 0.94 (0.86–1.03) |
| 10                 | 472                    | 15.31  | 1.00 (Reference) | 393              | 12.75  | 1.00 (Reference) | 399              | 12.94  | 1.00 (Reference) |
| <b>5-Min Apgar</b> |                        |        |                  |                  |        |                  |                  |        |                  |
| 0                  | <5                     | <25.00 | 0.66 (0.17–2.60) | <5               | <25.00 | 1.13 (0.44–2.9)  | <5               | <25.00 | 1.13 (0.44–2.88) |
| 1                  | 6                      | 37.5   | 2.42 (1.28–4.59) | <5               | <31.25 | 1.42 (0.58–3.52) | <5               | <31.25 | 1.92 (0.89–4.11) |
| 2                  | 9                      | 32.14  | 2.22 (1.23–4.01) | 7                | 25.00  | 1.87 (0.99–3.53) | 6                | 21.43  | 1.60 (0.83–3.07) |
| 3                  | 21                     | 25.30  | 1.75 (1.22–2.51) | 15               | 18.07  | 1.37 (0.87–2.17) | 12               | 14.46  | 1.08 (0.65–1.78) |
| 4                  | 25                     | 23.58  | 1.56 (1.12–2.18) | 18               | 16.98  | 1.26 (0.84–1.90) | 18               | 16.98  | 1.19 (0.77–1.82) |
| 5                  | 46                     | 15.86  | 1.06 (0.81–1.37) | 34               | 11.72  | 0.86 (0.63–1.19) | 33               | 11.38  | 0.84 (0.61–1.17) |
| 6                  | 164                    | 17.60  | 1.13 (0.99–1.30) | 159              | 17.06  | 1.26 (1.10–1.44) | 167              | 17.92  | 1.33 (1.16–1.52) |
| 7                  | 377                    | 15.87  | 1.08 (0.98–1.19) | 319              | 13.43  | 1.05 (0.95–1.16) | 336              | 14.15  | 1.11 (1.00–1.23) |
| 8                  | 1237                   | 16.14  | 1.08 (1.02–1.14) | 1014             | 13.23  | 1.04 (0.97–1.10) | 1021             | 13.32  | 1.06 (1.00–1.13) |
| 9                  | 15272                  | 15.09  | 1.03 (1.00–1.06) | 12904            | 12.75  | 1.02 (0.99–1.06) | 12641            | 12.49  | 1.04 (1.01–1.07) |
| 10                 | 5601                   | 14.99  | 1.00 (Reference) | 4640             | 12.42  | 1.00 (Reference) | 4473             | 11.97  | 1.00 (Reference) |

**Supplementary Table 2 (cont.). Apgar score at one and five minutes and rate ratios for each domain of the EDI, among singleton term live births in British Columbia, Canada**

| Apgar Score        | Language domain  |        |                  | Communication domain |              |                  |
|--------------------|------------------|--------|------------------|----------------------|--------------|------------------|
|                    | No. with outcome | %      | Adjusted*        | No. with outcome     | %            | Adjusted*        |
| <b>1-Min Apgar</b> |                  |        |                  | <b>18335</b>         | <b>12.18</b> |                  |
| 0                  | 5                | 20.83  | 1.85 (0.81–4.25) | <5                   | <20.83       | 1.27 (0.50–3.22) |
| 1                  | 60               | 12.79  | 1.42 (1.10–1.82) | 54                   | 11.51        | 1.07 (0.83–1.39) |
| 2                  | 106              | 10.00  | 1.05 (0.86–1.29) | 131                  | 12.36        | 1.12 (0.93–1.35) |
| 3                  | 174              | 9.89   | 1.07 (0.90–1.27) | 203                  | 11.53        | 1.05 (0.90–1.23) |
| 4                  | 269              | 10.42  | 1.14 (0.98–1.32) | 291                  | 11.27        | 1.04 (0.90–1.19) |
| 5                  | 435              | 10.69  | 1.14 (1.00–1.31) | 486                  | 11.94        | 1.10 (0.97–1.24) |
| 6                  | 733              | 10.51  | 1.13 (1.00–1.28) | 803                  | 11.51        | 1.07 (0.96–1.20) |
| 7                  | 1255             | 10.44  | 1.10 (0.98–1.23) | 1440                 | 11.98        | 1.08 (0.97–1.20) |
| 8                  | 3830             | 9.90   | 1.04 (0.93–1.16) | 4711                 | 12.18        | 1.04 (0.95–1.15) |
| 9                  | 7621             | 9.60   | 0.99 (0.89–1.10) | 9779                 | 12.32        | 1.00 (0.91–1.10) |
| 10                 | 305              | 9.89   | 1.00 (Reference) | 372                  | 12.07        | 1.00 (Reference) |
| <b>5-Min Apgar</b> |                  |        |                  |                      |              |                  |
| 0                  | 6                | 30.00  | 3.13 (1.52–6.44) | <5                   | <25.00       | 1.27 (0.43–3.70) |
| 1                  | <5               | <31.25 | 1.23 (0.38–3.92) | <5                   | <31.25       | 1.75 (0.74–4.13) |
| 2                  | 5                | 17.86  | 1.95 (0.86–4.43) | 7                    | 25.00        | 2.19 (1.09–4.41) |
| 3                  | 13               | 15.66  | 1.79 (1.11–2.91) | 14                   | 16.87        | 1.63 (1.00–2.68) |
| 4                  | 14               | 13.21  | 1.44 (0.89–2.34) | 15                   | 14.15        | 1.33 (0.84–2.12) |
| 5                  | 29               | 10.00  | 1.11 (0.78–1.57) | 29                   | 10.00        | 0.94 (0.67–1.33) |
| 6                  | 96               | 10.30  | 1.09 (0.90–1.31) | 107                  | 11.48        | 1.03 (0.87–1.23) |
| 7                  | 243              | 10.23  | 1.14 (1.01–1.29) | 255                  | 10.74        | 1.04 (0.92–1.16) |
| 8                  | 809              | 10.55  | 1.13 (1.06–1.22) | 895                  | 11.67        | 1.07 (1.00–1.14) |
| 9                  | 9939             | 9.82   | 1.04 (1.00–1.07) | 12595                | 12.45        | 1.03 (1.00–1.06) |
| 10                 | 3637             | 9.73   | 1.00 (Reference) | 4351                 | 11.64        | 1.00 (Reference) |

\*Adjusted for child's sex (male vs female), child's age at EDI completion (years), socioeconomic status (1st quintile, 2nd quintile, 3rd quintile, 4th quintile vs 5th quintile) child's first language (others vs English), birth order (2, 3, +4 vs 1), birth weight-for-gestational age (large, small vs appropriate), gestational age (weeks).

## STROBE Statement—checklist of items that should be included in reports of observational studies

|                              | Item No | Recommendation                                                                                                                                                                                                                                                                                                                                                                                                                                                                                                                                                                                                                                                                                                       |
|------------------------------|---------|----------------------------------------------------------------------------------------------------------------------------------------------------------------------------------------------------------------------------------------------------------------------------------------------------------------------------------------------------------------------------------------------------------------------------------------------------------------------------------------------------------------------------------------------------------------------------------------------------------------------------------------------------------------------------------------------------------------------|
| <b>Title and abstract</b>    | 1       | (a) Indicate the study's design with a commonly used term in the title or the abstract (Page 1 and 2)<br>(b) Provide in the abstract an informative and balanced summary of what was done and what was found (Page 2)                                                                                                                                                                                                                                                                                                                                                                                                                                                                                                |
| <b>Introduction</b>          |         |                                                                                                                                                                                                                                                                                                                                                                                                                                                                                                                                                                                                                                                                                                                      |
| Background/rationale         | 2       | Explain the scientific background and rationale for the investigation being reported (Page 3, paragraph 1 and 2)                                                                                                                                                                                                                                                                                                                                                                                                                                                                                                                                                                                                     |
| Objectives                   | 3       | State specific objectives, including any prespecified hypotheses (Page 4, paragraph 2)                                                                                                                                                                                                                                                                                                                                                                                                                                                                                                                                                                                                                               |
| <b>Methods</b>               |         |                                                                                                                                                                                                                                                                                                                                                                                                                                                                                                                                                                                                                                                                                                                      |
| Study design                 | 4       | Present key elements of study design early in the paper (Page 4, para 1)                                                                                                                                                                                                                                                                                                                                                                                                                                                                                                                                                                                                                                             |
| Setting                      | 5       | Describe the setting, locations, and relevant dates, including periods of recruitment, exposure, follow-up, and data collection (Page 6 to 9)                                                                                                                                                                                                                                                                                                                                                                                                                                                                                                                                                                        |
| Participants                 | 6       | (a) <i>Cohort study</i> —Give the eligibility criteria, and the sources and methods of selection of participants. Describe methods of follow-up (Page 4 to 7)<br><i>Case-control study</i> —Give the eligibility criteria, and the sources and methods of case ascertainment and control selection. Give the rationale for the choice of cases and controls<br><i>Cross-sectional study</i> —Give the eligibility criteria, and the sources and methods of selection of participants<br>(b) <i>Cohort study</i> —For matched studies, give matching criteria and number of exposed and unexposed (n/a)<br><i>Case-control study</i> —For matched studies, give matching criteria and the number of controls per case |
| Variables                    | 7       | Clearly define all outcomes, exposures, predictors, potential confounders, and effect modifiers. Give diagnostic criteria, if applicable (Page 4 to 7)                                                                                                                                                                                                                                                                                                                                                                                                                                                                                                                                                               |
| Data sources/<br>measurement | 8*      | For each variable of interest, give sources of data and details of methods of assessment (measurement). Describe comparability of assessment methods if there is more than one group (Page 4 to 7)                                                                                                                                                                                                                                                                                                                                                                                                                                                                                                                   |
| Bias                         | 9       | Describe any efforts to address potential sources of bias (n/a)                                                                                                                                                                                                                                                                                                                                                                                                                                                                                                                                                                                                                                                      |
| Study size                   | 10      | Explain how the study size was arrived at (n/a)                                                                                                                                                                                                                                                                                                                                                                                                                                                                                                                                                                                                                                                                      |
| Quantitative variables       | 11      | Explain how quantitative variables were handled in the analyses. If applicable, describe which groupings were chosen and why (Page 6 to 7)                                                                                                                                                                                                                                                                                                                                                                                                                                                                                                                                                                           |
| Statistical methods          | 12      | (a) Describe all statistical methods, including those used to control for confounding (Page 6 to 7)<br>(b) Describe any methods used to examine subgroups and interactions (n/a)<br>(c) Explain how missing data were addressed (n/a)<br>(d) <i>Cohort study</i> —If applicable, explain how loss to follow-up was addressed<br><i>Case-control study</i> —If applicable, explain how matching of cases and controls was addressed                                                                                                                                                                                                                                                                                   |

1  
2  
3  
4  
5  
6  
7  
8  
9  
10  
11  
12  
13  
14  
15  
16  
17  
18  
19  
20  
21  
22  
23  
24  
25  
26  
27  
28  
29  
30  
31  
32  
33  
34  
35  
36  
37  
38  
39  
40  
41  
42  
43  
44  
45  
46  
47  
48  
49  
50  
51  
52  
53  
54  
55  
56  
57  
58  
59  
60

*Cross-sectional study*—If applicable, describe analytical methods taking account of sampling strategy

---

(e) Describe any sensitivity analyses

Continued on next page

For peer review only

## Results

|                  |     |                                                                                                                                                                                                                                            |
|------------------|-----|--------------------------------------------------------------------------------------------------------------------------------------------------------------------------------------------------------------------------------------------|
| Participants     | 13* | (a) Report numbers of individuals at each stage of study—eg numbers potentially eligible, examined for eligibility, confirmed eligible, included in the study, completing follow-up, and analysed ( <a href="#">Page 7, para 1</a> )       |
|                  |     | (b) Give reasons for non-participation at each stage ( <a href="#">n/a</a> )                                                                                                                                                               |
|                  |     | (c) Consider use of a flow diagram                                                                                                                                                                                                         |
| Descriptive data | 14* | (a) Give characteristics of study participants (eg demographic, clinical, social) and information on exposures and potential confounders ( <a href="#">Page 7 and 8</a> )                                                                  |
|                  |     | (b) Indicate number of participants with missing data for each variable of interest                                                                                                                                                        |
|                  |     | (c) <i>Cohort study</i> —Summarise follow-up time (eg, average and total amount)                                                                                                                                                           |
| Outcome data     | 15* | <i>Cohort study</i> —Report numbers of outcome events or summary measures over time ( <a href="#">Page 7 and 8</a> )                                                                                                                       |
|                  |     | <i>Case-control study</i> —Report numbers in each exposure category, or summary measures of exposure                                                                                                                                       |
|                  |     | <i>Cross-sectional study</i> —Report numbers of outcome events or summary measures                                                                                                                                                         |
| Main results     | 16  | (a) Give unadjusted estimates and, if applicable, confounder-adjusted estimates and their precision (eg, 95% confidence interval). Make clear which confounders were adjusted for and why they were included ( <a href="#">Page 8 -9</a> ) |
|                  |     | (b) Report category boundaries when continuous variables were categorized                                                                                                                                                                  |
|                  |     | (c) If relevant, consider translating estimates of relative risk into absolute risk for a meaningful time period                                                                                                                           |
| Other analyses   | 17  | Report other analyses done—eg analyses of subgroups and interactions, and sensitivity analyses                                                                                                                                             |

## Discussion

|                  |    |                                                                                                                                                                                                              |
|------------------|----|--------------------------------------------------------------------------------------------------------------------------------------------------------------------------------------------------------------|
| Key results      | 18 | Summarise key results with reference to study objectives ( <a href="#">Page 9, last para</a> )                                                                                                               |
| Limitations      | 19 | Discuss limitations of the study, taking into account sources of potential bias or imprecision. Discuss both direction and magnitude of any potential bias ( <a href="#">Page 11</a> )                       |
| Interpretation   | 20 | Give a cautious overall interpretation of results considering objectives, limitations, multiplicity of analyses, results from similar studies, and other relevant evidence ( <a href="#">Page 10 to 11</a> ) |
| Generalisability | 21 | Discuss the generalisability (external validity) of the study results                                                                                                                                        |

## Other information

|         |    |                                                                                                                                                                                          |
|---------|----|------------------------------------------------------------------------------------------------------------------------------------------------------------------------------------------|
| Funding | 22 | Give the source of funding and the role of the funders for the present study and, if applicable, for the original study on which the present article is based ( <a href="#">Page 1</a> ) |
|---------|----|------------------------------------------------------------------------------------------------------------------------------------------------------------------------------------------|

\*Give information separately for cases and controls in case-control studies and, if applicable, for exposed and unexposed groups in cohort and cross-sectional studies.

**Note:** An Explanation and Elaboration article discusses each checklist item and gives methodological background and published examples of transparent reporting. The STROBE checklist is best used in conjunction with this article (freely available on the Web sites of PLoS Medicine at <http://www.plosmedicine.org/>, Annals of Internal Medicine at <http://www.annals.org/>, and Epidemiology at <http://www.epidem.com/>). Information on the STROBE Initiative is available at [www.strobe-statement.org](http://www.strobe-statement.org).
