# Supplementary material for: One-minute and five-minute Apgar scores and child developmental health at 5 years of age: a population-based cohort study in British Columbia, Canada
Source: PubMed Central journal article supplement — BMJ Open. 2019 May 9;9(5):e027655. doi: 10.1136/bmjopen-2018-027655 (PMC6528022; doi:10.1136/bmjopen-2018-027655), 2019-05-09
Supplement: bmjopen-2018-027655supp001.pdf [file bmjopen-2018-027655supp001.pdf]

**Supplementary Table 1. Five domains of the Early Development Instrument**

---

| EDI domains                                | Characteristics addressed                                                                                                                                                                  |
|--------------------------------------------|--------------------------------------------------------------------------------------------------------------------------------------------------------------------------------------------|
| Physical health and well-being             | Children’s fine and gross motor skills, energy levels, fatigue and clumsiness                                                                                                              |
| Social competence                          | Self-confidence, tolerance, ability to get along with other children, to accept responsibility for their own actions, to work independently                                                |
| Emotional maturity                         | Children’s general emotional health and maturity. It also identifies minor problems with aggression, restlessness, distractibility or inattentiveness as well as excessive regular sadness |
| Language and cognitive skills              | Mastery of the basics of reading and writing, interest in books, and numerical skills                                                                                                      |
| Communication skills and general knowledge | Children’s general knowledge, their ability to articulate clearly and their ability to understand and communicate in English                                                               |

---

**Supplementary Table 2. Apgar score at one and five minutes and rate ratios for vulnerability in each domain of the EDI, among singleton term live births in British Columbia, Canada**

| Apgar Score        | Physical health domain |        |                  | Social domain    |        |                  | Emotional domain |        |                  |
|--------------------|------------------------|--------|------------------|------------------|--------|------------------|------------------|--------|------------------|
|                    | No. with outcome       | %      | Adjusted*        | No. with outcome | %      | Adjusted*        | No. with outcome | %      | Adjusted*        |
| <b>1-Min Apgar</b> |                        |        |                  |                  |        |                  |                  |        |                  |
| 0                  | <5                     | <20.83 | 0.90 (0.37–2.19) | <5               | <20.83 | 1.01 (0.40–2.51) | <5               | <20.83 | 0.71 (0.25–1.96) |
| 1                  | 88                     | 18.76  | 1.24 (1.02–1.52) | 82               | 17.48  | 1.30 (1.05–1.61) | 83               | 17.7   | 1.25 (1.01–1.54) |
| 2                  | 179                    | 16.89  | 1.09 (0.93–1.27) | 142              | 13.40  | 0.97 (0.82–1.16) | 147              | 13.87  | 0.96 (0.81–1.14) |
| 3                  | 283                    | 16.08  | 1.06 (0.93–1.21) | 246              | 13.98  | 1.03 (0.89–1.19) | 273              | 15.51  | 1.09 (0.95–1.25) |
| 4                  | 410                    | 15.88  | 1.06 (0.94–1.19) | 349              | 13.52  | 1.02 (0.89–1.16) | 370              | 14.33  | 1.03 (0.91–1.18) |
| 5                  | 644                    | 15.83  | 1.04 (0.93–1.16) | 569              | 13.98  | 1.06 (0.94–1.19) | 563              | 13.84  | 1.01 (0.90–1.13) |
| 6                  | 1076                   | 15.43  | 1.02 (0.93–1.13) | 925              | 13.26  | 1.02 (0.92–1.14) | 932              | 13.36  | 1.00 (0.89–1.11) |
| 7                  | 1889                   | 15.72  | 1.03 (0.94–1.13) | 1555             | 12.94  | 1.00 (0.90–1.11) | 1500             | 12.48  | 0.94 (0.85–1.04) |
| 8                  | 5876                   | 15.19  | 1.01 (0.93–1.10) | 4993             | 12.91  | 1.01 (0.92–1.11) | 4836             | 12.51  | 0.96 (0.87–1.05) |
| 9                  | 11839                  | 14.92  | 0.99 (0.91–1.08) | 9858             | 12.42  | 0.97 (0.89–1.07) | 9608             | 12.11  | 0.94 (0.86–1.03) |
| 10                 | 472                    | 15.31  | 1.00 (Reference) | 393              | 12.75  | 1.00 (Reference) | 399              | 12.94  | 1.00 (Reference) |
| <b>5-Min Apgar</b> |                        |        |                  |                  |        |                  |                  |        |                  |
| 0                  | <5                     | <25.00 | 0.66 (0.17–2.60) | <5               | <25.00 | 1.13 (0.44–2.9)  | <5               | <25.00 | 1.13 (0.44–2.88) |
| 1                  | 6                      | 37.5   | 2.42 (1.28–4.59) | <5               | <31.25 | 1.42 (0.58–3.52) | <5               | <31.25 | 1.92 (0.89–4.11) |
| 2                  | 9                      | 32.14  | 2.22 (1.23–4.01) | 7                | 25.00  | 1.87 (0.99–3.53) | 6                | 21.43  | 1.60 (0.83–3.07) |
| 3                  | 21                     | 25.30  | 1.75 (1.22–2.51) | 15               | 18.07  | 1.37 (0.87–2.17) | 12               | 14.46  | 1.08 (0.65–1.78) |
| 4                  | 25                     | 23.58  | 1.56 (1.12–2.18) | 18               | 16.98  | 1.26 (0.84–1.90) | 18               | 16.98  | 1.19 (0.77–1.82) |
| 5                  | 46                     | 15.86  | 1.06 (0.81–1.37) | 34               | 11.72  | 0.86 (0.63–1.19) | 33               | 11.38  | 0.84 (0.61–1.17) |
| 6                  | 164                    | 17.60  | 1.13 (0.99–1.30) | 159              | 17.06  | 1.26 (1.10–1.44) | 167              | 17.92  | 1.33 (1.16–1.52) |
| 7                  | 377                    | 15.87  | 1.08 (0.98–1.19) | 319              | 13.43  | 1.05 (0.95–1.16) | 336              | 14.15  | 1.11 (1.00–1.23) |
| 8                  | 1237                   | 16.14  | 1.08 (1.02–1.14) | 1014             | 13.23  | 1.04 (0.97–1.10) | 1021             | 13.32  | 1.06 (1.00–1.13) |
| 9                  | 15272                  | 15.09  | 1.03 (1.00–1.06) | 12904            | 12.75  | 1.02 (0.99–1.06) | 12641            | 12.49  | 1.04 (1.01–1.07) |
| 10                 | 5601                   | 14.99  | 1.00 (Reference) | 4640             | 12.42  | 1.00 (Reference) | 4473             | 11.97  | 1.00 (Reference) |

**Supplementary Table 2 (cont.). Apgar score at one and five minutes and rate ratios for each domain of the EDI, among singleton term live births in British Columbia, Canada**

| Apgar Score        | Language domain  |        |                  | Communication domain |              |                  |
|--------------------|------------------|--------|------------------|----------------------|--------------|------------------|
|                    | No. with outcome | %      | Adjusted*        | No. with outcome     | %            | Adjusted*        |
| <b>1-Min Apgar</b> |                  |        |                  | <b>18335</b>         | <b>12.18</b> |                  |
| 0                  | 5                | 20.83  | 1.85 (0.81–4.25) | <5                   | <20.83       | 1.27 (0.50–3.22) |
| 1                  | 60               | 12.79  | 1.42 (1.10–1.82) | 54                   | 11.51        | 1.07 (0.83–1.39) |
| 2                  | 106              | 10.00  | 1.05 (0.86–1.29) | 131                  | 12.36        | 1.12 (0.93–1.35) |
| 3                  | 174              | 9.89   | 1.07 (0.90–1.27) | 203                  | 11.53        | 1.05 (0.90–1.23) |
| 4                  | 269              | 10.42  | 1.14 (0.98–1.32) | 291                  | 11.27        | 1.04 (0.90–1.19) |
| 5                  | 435              | 10.69  | 1.14 (1.00–1.31) | 486                  | 11.94        | 1.10 (0.97–1.24) |
| 6                  | 733              | 10.51  | 1.13 (1.00–1.28) | 803                  | 11.51        | 1.07 (0.96–1.20) |
| 7                  | 1255             | 10.44  | 1.10 (0.98–1.23) | 1440                 | 11.98        | 1.08 (0.97–1.20) |
| 8                  | 3830             | 9.90   | 1.04 (0.93–1.16) | 4711                 | 12.18        | 1.04 (0.95–1.15) |
| 9                  | 7621             | 9.60   | 0.99 (0.89–1.10) | 9779                 | 12.32        | 1.00 (0.91–1.10) |
| 10                 | 305              | 9.89   | 1.00 (Reference) | 372                  | 12.07        | 1.00 (Reference) |
| <b>5-Min Apgar</b> |                  |        |                  |                      |              |                  |
| 0                  | 6                | 30.00  | 3.13 (1.52–6.44) | <5                   | <25.00       | 1.27 (0.43–3.70) |
| 1                  | <5               | <31.25 | 1.23 (0.38–3.92) | <5                   | <31.25       | 1.75 (0.74–4.13) |
| 2                  | 5                | 17.86  | 1.95 (0.86–4.43) | 7                    | 25.00        | 2.19 (1.09–4.41) |
| 3                  | 13               | 15.66  | 1.79 (1.11–2.91) | 14                   | 16.87        | 1.63 (1.00–2.68) |
| 4                  | 14               | 13.21  | 1.44 (0.89–2.34) | 15                   | 14.15        | 1.33 (0.84–2.12) |
| 5                  | 29               | 10.00  | 1.11 (0.78–1.57) | 29                   | 10.00        | 0.94 (0.67–1.33) |
| 6                  | 96               | 10.30  | 1.09 (0.90–1.31) | 107                  | 11.48        | 1.03 (0.87–1.23) |
| 7                  | 243              | 10.23  | 1.14 (1.01–1.29) | 255                  | 10.74        | 1.04 (0.92–1.16) |
| 8                  | 809              | 10.55  | 1.13 (1.06–1.22) | 895                  | 11.67        | 1.07 (1.00–1.14) |
| 9                  | 9939             | 9.82   | 1.04 (1.00–1.07) | 12595                | 12.45        | 1.03 (1.00–1.06) |
| 10                 | 3637             | 9.73   | 1.00 (Reference) | 4351                 | 11.64        | 1.00 (Reference) |

\*Adjusted for child's sex (male vs female), child's age at EDI completion (years), socioeconomic status (1st quintile, 2nd quintile, 3rd quintile, 4th quintile vs 5th quintile) child's first language (others vs English), birth order (2, 3, +4 vs 1), birth weight-for-gestational age (large, small vs appropriate), gestational age (weeks).
